# Supplementary material for: Synthesis and reactivity of 1-sulfonylcyclooctatriazoles
Source: Royal Society of Chemistry journal article supplement (doi:10.1039/d2cc03648g), 2022-01-01
Supplement: d2cc03648g1.pdf [file d2cc03648g1.pdf]

# Synthesis and Reactivity of 1-Sulfonylcyclooctatriazoles

## Supporting Information

Matthew B. Williams, Ruairaidh J. Wells and Alistair Boyer

# Contents

|                                                        |    |
|--------------------------------------------------------|----|
| Contents.....                                          | 2  |
| CAUTION .....                                          | 3  |
| General Experimental Considerations .....              | 3  |
| Experimental Protocols and Compound Data.....          | 4  |
| General Procedure 1 .....                              | 7  |
| General Procedure 2 .....                              | 10 |
| Optimisation and <i>ee</i> Data .....                  | 14 |
| NMR Spectra .....                                      | 25 |
| Optimised Structures and Thermochemical Analyses ..... | 54 |
| GS1 .....                                              | 55 |
| GS2 .....                                              | 56 |
| GS3 .....                                              | 57 |
| GS4 .....                                              | 58 |
| TS1.....                                               | 59 |
| TS2.....                                               | 61 |
| TS3.....                                               | 63 |
| References .....                                       | 65 |

## CAUTION

**NITROGEN-RICH COMPOUNDS, SUCH AS AZIDES AND TRIAZOLES, CAN DECOMPOSE VIOLENTLY WITH THE LOSS OF NITROGEN GAS.**

**Although no problems were encountered in the course of this study, appropriate precautions should be taken.**

## **General Experimental Considerations**

NMR spectra were recorded on 400 and 500 MHz Bruker spectrometers. Chemical shifts are given in ppm and the spectra are calibrated to the residual  $^1\text{H}$  and  $^{13}\text{C}$  signals of the solvents.  $^{13}\text{C}$  NMR spectra were collected with complete proton decoupling and assignments were made using COSY, HSQC, HMBC and NOESY experiments. Samples were melted directly from the procedures described.

High-resolution mass spectra were obtained on Agilent 6546 LC/Q-TOF and Bruker microTOFq instruments by Analytical Services at the University of Glasgow School of Chemistry.

IR spectra were recorded using spectrometers fitted with an ATR device.

$\text{CH}_2\text{Cl}_2$ , THF and toluene were purified on a PureSolv PM500 and other reagents were used as received.

Reactions were monitored by thin layer chromatography (TLC) using Merck TLC silica gel 60 F254 aluminum-foil baked plates. Compounds were visualized by UV light at nm or by staining with potassium permanganate.

Column chromatography was performed using a Teledyne ISCO Combiflash Rf+ System using Redisep Rf silica cartridges.

Enantiomeric excess was determined by integration of HPLC traces using chiral stationary phase Daicel Chiralpak AD-H column (0.46  $\varnothing$   $\times$  25 cm) using a Shimadzu Prominence System (LC20AD) with Oven (CTO20AC, 25  $^\circ\text{C}$ ) and diode array detector (SPDM20A).

## Experimental Protocols and Compound Data

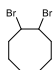

### 1,2-Dibromocyclooctane (**S1**)

*cis*-Cyclooctene (50.8 mL, 390 mmol, 1.0 equiv.) was dissolved in dichloromethane (200 mL) and cooled to  $-40\text{ }^{\circ}\text{C}$  (acetone, dry ice). A solution of bromine (20.0 mL, 390 mmol, 1.0 equiv.) in dichloromethane (40 mL) was added dropwise until a persistent yellow colour was observed. The reaction was quenched by the addition of saturated aqueous sodium thiosulfate (80 mL) and the aqueous phase extracted with dichloromethane ( $3 \times 80\text{ mL}$ ). The combined organic layers were dried ( $\text{MgSO}_4$ ), filtered and concentrated *in vacuo* to give the title compound (97.2 g, 92%) as a colourless oil. The crude product was used without further purification.  $^1\text{H}$  NMR (500 MHz,  $25.0\text{ }^{\circ}\text{C}$ ,  $\text{CDCl}_3$ )  $\delta$  4.61–4.56 (2 H, m, CH), 2.45–2.38 (2 H, m,  $\text{CH}_2$ ), 2.13–2.06 (2 H, m,  $\text{CH}_2$ ), 1.90–1.81 (2 H, m,  $\text{CH}_2$ ), 1.72–1.65 (2 H, m,  $\text{CH}_2$ ), 1.64–1.55 (2 H, m,  $\text{CH}_2$ ) and 1.51–1.41 (2 H, m,  $\text{CH}_2$ ). Recorded data consistent with previous values.<sup>[1]</sup>

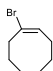

### (*E*)-1-Bromocyclooctene (**S2**)

In a flame-dried flask under argon,  $\text{KOtBu}$  (59.5 g, 531 mmol, 1.5 equiv.) was suspended in THF (200 mL) and the suspension was cooled to  $0\text{ }^{\circ}\text{C}$  (ice bath). A solution of 1,2-dibromocyclooctane **S1** (95.2 g, 353 mmol, 1.0 equiv.) in THF (40 mL) was added dropwise over 30 min. Then the reaction mixture was stirred at ambient temperature for 1 h and the reaction was quenched by the addition of ice-cold saturated aqueous ammonium chloride (160 mL). The THF was removed *in vacuo* and the aqueous phase extracted with dichloromethane ( $3 \times 80\text{ mL}$ ). The combined organic layers were dried ( $\text{MgSO}_4$ ), filtered and concentrated *in vacuo*. The residue was purified by Kugelrohr bulb to bulb distillation ( $110\text{ }^{\circ}\text{C}$ , 15.0 mbar) to afford the title compound (48.6 g, 73%) as an orange oil.  $^1\text{H}$  NMR (500 MHz,  $25.0\text{ }^{\circ}\text{C}$ ,  $\text{CDCl}_3$ )  $\delta$  6.03 (1 H, t,  $J = 8.5\text{ Hz}$ , =CH), 2.64–2.59 (2 H, m,  $\text{CH}_2$ ), 2.12–2.07 (2 H, m,  $\text{CH}_2$ ), 1.66–1.61 (2 H, m,  $\text{CH}_2$ ) and 1.58–1.47 (6 H, m,  $\text{CH}_2$ );  $^{13}\text{C}\{^1\text{H}\}$  NMR (126 MHz,  $25.0\text{ }^{\circ}\text{C}$ ,  $\text{CDCl}_3$ )  $\delta$  131.7 (=CH), 124.8 (=C), 35.1 ( $\text{CH}_2$ ), 29.8 ( $\text{CH}_2$ ), 28.6 ( $\text{CH}_2$ ), 27.5 ( $\text{CH}_2$ ), 26.4 ( $\text{CH}_2$ ) and 25.5 ( $\text{CH}_2$ ). Recorded data consistent with previous values.<sup>[1]</sup>

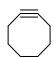

### Cyclooctyne (**18**)

In a flame-dried flask under argon, a solution of diisopropylamine (26.8 mL, 191 mmol, 1.0 equiv.) in THF (90 mL) was cooled to  $-25\text{ }^{\circ}\text{C}$  (dry ice, acetone) and  $n\text{BuLi}$  (2.5 M solution in hexanes, 76.4 mL, 191 mmol, 1.0 equiv.) was added dropwise. 1-Bromocyclooct-1-ene **S2** (36.1 g, 191 mmol, 1.0 equiv.) was added in one portion and a dark orange colour was immediately observed. The reaction was allowed to warm up to  $15\text{ }^{\circ}\text{C}$  over 45 min and stirred at this temperature for a further 3 h by which point the reaction mixture had turned pale yellow. The reaction was quenched by the addition of ice-cold HCl (2 M aq., 95.0 mL) and the aqueous phase was extracted with pentane ( $5 \times 20\text{ mL}$ ). The combined organic layers were washed with water and brine; dried ( $\text{MgSO}_4$ ) and carefully concentrated *in vacuo* ( $0\text{ }^{\circ}\text{C}$ , ice bath,  $\sim 100\text{ mbar}$ ). The residue was purified by distillation (Vigreux column) to afford the title compound (6.31 g, 31%) as a colourless oil. b.pt.  $56\text{ }^{\circ}\text{C}$ , 18 mbar;  $\nu_{\text{max}}$ (film)  $2928\text{ cm}^{-1}$ ;  $^1\text{H}$  NMR (500 MHz,  $-3.3\text{ }^{\circ}\text{C}$ ,  $\text{CDCl}_3$ )  $\delta$  2.19–2.14 (4 H, m,  $2 \times \text{CH}_2$ ), 1.89–1.83 (4 H, m,  $2 \times \text{CH}_2$ ) and 1.65–1.60 (4 H, m,  $2 \times \text{CH}_2$ );  $^{13}\text{C}\{^1\text{H}\}$  NMR (126 MHz,  $25.0\text{ }^{\circ}\text{C}$ ,  $\text{CDCl}_3$ )  $\delta$  94.7 ( $2 \times \text{C}\equiv\text{C}$ ), 34.7 ( $2 \times \text{CH}_2$ ), 29.8 ( $2 \times \text{CH}_2$ ) and 21.0 ( $2 \times \text{CH}_2$ ). Recorded data consistent with previous values.<sup>[1]</sup>

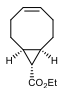

**Ethyl (1*R*\*,8*S*\*,9*r*\*,*Z*)-bicyclo[6.1.0]non-4-ene-9-carboxylate (S3)**

In a flame-dried flask, cyclooctadiene (55.4 mL, 452 mmol, 8.0 equiv.) and Rh<sub>2</sub>(OAc)<sub>4</sub> (1.00 g, 4 mol %) were dissolved in dichloromethane (40 mL). A solution of ethyl diazoacetate (85 wt% in dichloromethane, 7.58 g, 56.5 mmol, 1.0 equiv.) in dichloromethane (20 mL) was added dropwise over 6 h. The reaction mixture was concentrated *in vacuo* and filtered through a short pad of silica (eluting with hexane followed by 20% EtOAc in hexane). The filtrate was concentrated *in vacuo* and the residue was purified by flash column chromatography (SiO<sub>2</sub>, gradient from 1 to 3% EtOAc in petroleum ether) to give the (1*R*\*,8*S*\*,9*s*\*,*Z*)-diastereomer (3.74 g, 34%) as a colourless oil (data not presented) followed by the (1*R*\*,8*S*\*,9*r*\*,*Z*)-diastereomer (4.08 g, 37%) as a colourless oil.  $\nu_{\max}$ (film) 2980, 2933, 1721, 1307, 1184 and 1153 cm<sup>-1</sup>; <sup>1</sup>H NMR (400 MHz, 24.9 °C, CDCl<sub>3</sub>)  $\delta$  5.68–5.59 (2.0 H, m, =CH), 4.10 (2 H, q, *J* = 7.1 Hz, Et CH<sub>2</sub>), 2.35–2.25 (2 H, m, CH<sub>2</sub>), 2.24–2.15 (2 H, m, CH<sub>2</sub>), 2.13–2.04 (2 H, m, CH<sub>2</sub>), 1.60–1.52 (2 H, m, cyclopropane CH), 1.53–1.42 (2 H, m, CH<sub>2</sub>), 1.25 (3 H, t, *J* = 7.1 Hz, Et CH<sub>3</sub>) and 1.18 (1 H, t, *J* = 4.5 Hz, cyclopropane CH); <sup>13</sup>C{<sup>1</sup>H} NMR (101 MHz, 24.9 °C, CDCl<sub>3</sub>)  $\delta$  174.4 (C=O), 129.9 (2 × =CH), 60.2 (Et CH<sub>2</sub>), 28.3 (2 × CH<sub>2</sub>), 27.9 (cyclopropane CH), 27.7 (2 × cyclopropane CH), 26.6 (2 × CH<sub>2</sub>) and 14.3 (Et CH<sub>3</sub>); HRMS (ESI-TOF) *m/z*: [M+Na]<sup>+</sup> Calcd for C<sub>12</sub>H<sub>18</sub>NaO<sub>2</sub><sup>+</sup> 217.1199; Found 217.1200. Recorded data consistent with previous values.<sup>[2]</sup>

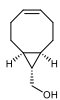

**(1*R*\*,8*S*\*,9*r*\*,*Z*)-Bicyclo[6.1.0]non-4-en-9-ylmethanol (S4)**

In a flame-dried flask under argon, LiAlH<sub>4</sub> (1.48 g, 38.9 mmol, 1.0 equiv.) was suspended in diethyl ether (200 mL) and cooled to 0 °C (ice bath). A solution of ester **S3** (7.64 g, 38.9 mmol, 1.0 equiv.) in diethyl ether (20 mL) was added dropwise over 10 min. The reaction mixture was stirred for 15 min and then the reaction was quenched by the addition of water (1.5 mL), 1 M aqueous NaOH (1.5 mL) and water (4.5 mL). MgSO<sub>4</sub> was added and the reaction allowed to stir for 15 min before being filtrated and concentrated *in vacuo* to afford the title compound (5.92 g, >98%) as a colourless oil. The crude product was used without further purification.  $\nu_{\max}$ (film) 3304, 2992, 2913, 2859 and 1026 cm<sup>-1</sup>; <sup>1</sup>H NMR (400 MHz, 24.9 °C, CDCl<sub>3</sub>)  $\delta$  5.99–5.68 (2 H, m, =CH), 3.47 (2 H, d, *J* = 7.0 Hz, CH<sub>2</sub>OH), 2.34–2.24 (2 H, m, CH<sub>2</sub>), 2.21–2.12 (2 H, m, CH<sub>2</sub>), 2.11–2.02 (2 H, m, CH<sub>2</sub>), 1.48–1.34 (2 H, m, CH<sub>2</sub>), 1.28 (1 H, br s, OH), 0.83–0.73 (2 H, m, cyclopropane CH) and 0.69–0.63 (1 H, m, cyclopropane CH); <sup>13</sup>C{<sup>1</sup>H} NMR (101 MHz, 24.9 °C, CDCl<sub>3</sub>)  $\delta$  130.2 (2 × =CH), 67.3 (CH<sub>2</sub>OH), 29.0 (2 × CH<sub>2</sub>), 28.9 (cyclopropane CH), 27.1 (2 × CH<sub>2</sub>) and 22.1 (2 × cyclopropane CH); HRMS (ESI-TOF) *m/z*: [M+Na]<sup>+</sup> Calcd for C<sub>10</sub>H<sub>16</sub>NaO<sup>+</sup> 175.1093; Found 175.1098. Recorded data consistent with previous values.<sup>[2]</sup>

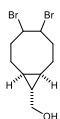

**(1*R*\*,8*S*\*,9*r*\*)-4,5-Dibromobicyclo[6.1.0]non-9-ylmethanol (S5)**

A solution of alkene **S4** (5.92 g, 38.0 mmol, 1.0 equiv.) in dichloromethane (200 mL) was cooled to –40 °C. A solution of bromine (1.95 mL, 38.0 mmol, 1.0 equiv.) in dichloromethane (4 mL) was added dropwise until a yellow colour persisted. The reaction was quenched by the addition of saturated aqueous sodium thiosulfate (8.0 mL) and the aqueous phase extracted with dichloromethane (3 × 8.0 mL). The combined organic layers were dried (MgSO<sub>4</sub>) filtered and concentrated *in vacuo* to give the title compound (11.5 g, 97%) as a colourless oil. The crude product was used without further purification.  $\nu_{\max}$ (film) 3337, 2990, 2920, 2862, 1427 and 1026 cm<sup>-1</sup>; <sup>1</sup>H NMR (400 MHz, 25.0 °C, CDCl<sub>3</sub>)  $\delta$  4.87–4.76 (2 H, m, CHBr), 3.45 (2 H, dd, *J* = 7.1, 1.2 Hz, CH<sub>2</sub>), 2.66–2.57 (1 H, m, CH<sub>2</sub>), 2.56–2.50 (1 H, m, CH<sub>2</sub>), 2.24–2.14 (1 H, m, CH<sub>2</sub>), 2.06–1.95 (3 H, m, CH<sub>2</sub>), 1.43–1.26 (2 H, m, CH<sub>2</sub>), 0.90–0.76 (2 H, m, cyclopropane CH) and 0.65–0.57 (1 H, m, cyclopropane CH); <sup>13</sup>C{<sup>1</sup>H} NMR (101 MHz, 25.0 °C, CDCl<sub>3</sub>)  $\delta$  66.6 (CH<sub>2</sub>OH), 56.2 (CHBr), 53.2 (CHBr), 34.9 (CH<sub>2</sub>), 34.8 (CH<sub>2</sub>), 28.2 (cyclopropane CH), 24.4 (CH<sub>2</sub>), 23.6 (CH<sub>2</sub>), 22.5 (cyclopropane CH) and 19.8 (cyclopropane CH). Recorded data consistent with previous values.<sup>[2]</sup>

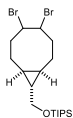

**(1R\*,8S\*,9r\*)-4,5-Dibromobicyclo[6.1.0]non-9-ylmethoxytriisopropylsilane (S6)**

Alcohol **S5** (3.00 g, 9.61 mmol, 1.0 equiv.), imidazole (1.31 g, 19.2 mmol, 2.0 equiv.) and *N,N*-dimethyl-4-aminopyridine (1.17 g, 9.61 mmol, 1.0 equiv.) were dissolved in dichloromethane (40 mL) and cooled to 0 °C (ice bath). Triisopropylsilylchloride (2.69 mL, 12.58 mmol, 1.3 equiv.) was added dropwise and the reaction allowed to warm to ambient temperature overnight. Saturated aqueous sodium bicarbonate (20 mL) was added and the aqueous phase extracted with dichloromethane (3 × 10 mL). The combined organic layers were washed with brine, dried (MgSO<sub>4</sub>), filtered and concentrated *in vacuo*. The residue was purified by flash column chromatography (SiO<sub>2</sub>, gradient from 2 to 10% EtOAc in petroleum ether) to afford the title compound (4.29 g, 95%) as a colourless oil.  $\nu_{\max}$ (film) 2940, 2862, 1462, 1103 and 1065 cm<sup>-1</sup>; <sup>1</sup>H NMR (400 MHz, 25.0 °C, CDCl<sub>3</sub>)  $\delta$  4.85–4.76 (2 H, m, CHBr), 3.66–3.59 (2 H, m, CH<sub>2</sub>OTIPS), 2.71–2.63 (1 H, m, CH<sub>2</sub>), 2.62–2.55 (1 H, m, CH<sub>2</sub>), 2.29–2.19 (2 H, m, CH<sub>2</sub>), 2.12–2.00 (2 H, m, CH<sub>2</sub>), 1.49–1.29 (2 H, m, CH<sub>2</sub>), 1.09–1.01 (21 H, m, 3 × *i*Pr), 0.96–0.81 (2 H, m, 2 × cyclopropane CH) and 0.58 (1 H, td, *J* = 6.1, 4.6 Hz, cyclopropane CH); <sup>13</sup>C{<sup>1</sup>H} NMR (101 MHz, 25.0 °C, CDCl<sub>3</sub>)  $\delta$  66.1 (CH<sub>2</sub>OH), 56.6 (CHBr), 53.5 (CHBr), 35.1 (2 × CH<sub>2</sub>), 28.2 (cyclopropane CH), 24.5 (CH<sub>2</sub>), 23.8 (CH<sub>2</sub>), 22.0 (cyclopropane CH), 19.2 (cyclopropane CH), 18.0 (6 × *i*Pr) and 12.1 (3 × *i*Pr).

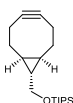

**(1R\*,8S\*,9r\*)-Bicyclo[6.1.0]non-4-yn-9-ylmethoxytriisopropylsilane (19)**

In a flame-dried flask under argon, a solution of dibromobicyclo **S6** (4.00 g, 8.54 mmol, 1.0 equiv.) in THF (100 mL) was cooled to 0 °C (ice bath). KO<sup>t</sup>Bu (2.30 g, 20.5 mmol, 2.4 equiv.) was added in one portion and the reaction vigorously stirred for 1 h. The reaction was heated under reflux for a further 2 h before being cooled to ambient temperature. The reaction was quenched by the addition of saturated aqueous ammonium chloride (50 mL). THF was removed *in vacuo* and the aqueous phase was extracted with diethyl ether (3 × 15 mL). The combined organic layers were washed with brine, dried (MgSO<sub>4</sub>), filtered and concentrated *in vacuo*. The residue was purified by flash column chromatography (SiO<sub>2</sub>, gradient from 2 to 10% EtOAc in petroleum ether) to give the title compound (1.89 g, 72%) as a yellow oil.  $\nu_{\max}$ (film) 2940, 2864, 1462, 1445, 1098 and 1067 cm<sup>-1</sup>; <sup>1</sup>H NMR (400 MHz, 27.0 °C, CDCl<sub>3</sub>)  $\delta$  3.65 (2 H, d, *J* = 6.0 Hz, CH<sub>2</sub>OTIPS), 2.43–2.36 (2 H, m, CH<sub>2</sub>), 2.33–2.23 (2 H, m, CH<sub>2</sub>), 2.17–2.09 (2 H, m, CH<sub>2</sub>), 1.44–1.31 (2 H, m, CH<sub>2</sub>), 1.07–1.04 (21 H, m, 3 × *i*Pr), 0.74–0.66 (2 H, m, cyclopropane CH) and 0.62–0.55 (1 H, m, cyclopropane CH); <sup>13</sup>C{<sup>1</sup>H} NMR (101 MHz, 27.0 °C, CDCl<sub>3</sub>)  $\delta$  98.9 (2 × C≡C), 66.6 (CH<sub>2</sub>OTIPS), 33.6 (2 × CH<sub>2</sub>), 27.5 (cyclopropane CH), 22.1 (2 × cyclopropane CH), 21.6 (2 × CH<sub>2</sub>), 18.0 (6 × *i*Pr) and 12.1 (3 × *i*Pr); HRMS (ESI-TOF) *m/z*: [M+Na]<sup>+</sup> Calcd for C<sub>19</sub>H<sub>34</sub>NaOSi<sup>+</sup> 329.2271; Found 329.2263.

## General Procedure 1

Cyclic alkyne (1.0 equiv.) was dissolved in CH<sub>2</sub>Cl<sub>2</sub> (0.4 M in a flame-dried vial under argon). Methanesulfonyl azide (1.0 equiv.) was added in one portion and the reaction stirred for 20 min. The reaction mixture was concentrated *in vacuo* to afford the triazole. Where required, purification was by flash column chromatography (silica gel, gradient of 10–30% EtOAc in petroleum ether).

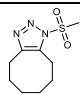

### 1-Methanesulfonyl-4,5,6,7,8,9-hexahydrocycloocta[d][1,2,3]triazole (**20a**)

Cyclooctyne **18** (324 mg, 3.0 mmol, 0.94 equiv.) and methanesulfonyl azide (386 mg, 3.2 mmol, 1.0 equiv.) were mixed in CH<sub>2</sub>Cl<sub>2</sub> (7.5 mL) according to General Procedure 1 to give the title compound **20a** (725 mg, >98%) as a white solid. m.pt. 50–52 °C;  $\nu_{\max}(\text{film})$  cm<sup>-1</sup>; <sup>1</sup>H NMR (500 MHz, 25.0 °C, CDCl<sub>3</sub>)  $\delta$  3.52 (3 H, s, CH<sub>3</sub>), 3.11–3.07 (2 H, m,  $\alpha$ -CH<sub>2</sub>), 2.94–2.89 (2 H, m,  $\alpha'$ -CH<sub>2</sub>), 1.89–1.83 (2 H, m,  $\beta$ -CH<sub>2</sub>), 1.79–1.73 (2 H, m,  $\beta'$ -CH<sub>2</sub>) and 1.52–1.40 (4 H, m,  $\gamma$ -CH<sub>2</sub>); <sup>13</sup>C{<sup>1</sup>H} NMR (126 MHz, 25.0 °C, CDCl<sub>3</sub>)  $\delta$  146.0 (triazole), 135.7 (triazole), 42.9 (CH<sub>3</sub>), 28.8 ( $\beta'$ -CH<sub>2</sub>), 26.9 ( $\beta$ -CH<sub>2</sub>), 25.7 ( $\alpha'$ -CH<sub>2</sub>), 24.9 ( $\alpha$ -CH<sub>2</sub>), 24.6 ( $\gamma'$ -CH<sub>2</sub>) and 21.7 ( $\gamma$ -CH<sub>2</sub>); HRMS (ESI-TOF)  $m/z$ : [M+Na]<sup>+</sup> Calcd for C<sub>9</sub>H<sub>15</sub>N<sub>3</sub>NaO<sub>2</sub>S<sup>+</sup> 252.0777; Found 252.0769.

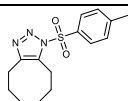

### 1-(4-Tolyl)sulfonyl-4,5,6,7,8,9-hexahydrocycloocta[d][1,2,3]triazole (**20b**)

Cyclooctyne **18** (988 mg, 9.1 mmol, 1.7 equiv.) and 4-toluenesulfonyl azide (1.03 g, 5.2 mmol, 1.0 equiv.) were mixed in CH<sub>2</sub>Cl<sub>2</sub> (5.0 mL) according to General Procedure 1 to give the title compound **20b** (1.56 g, 98%) as a white solid. m.pt. 159–161 °C;  $\nu_{\max}(\text{film})$  2928, 2857, 1387 and 1194 cm<sup>-1</sup>; <sup>1</sup>H NMR (500 MHz, 25.0 °C, CDCl<sub>3</sub>)  $\delta$  7.93 (2 H, d,  $J$  = 8.5 Hz, ArH), 7.36 (2 H, d,  $J$  = 8.5 Hz, ArH), 3.07–3.03 (2 H, m,  $\alpha$ -CH<sub>2</sub>), 2.86–2.81 (2 H, m,  $\alpha'$ -CH<sub>2</sub>), 2.44 (3 H, s, CH<sub>3</sub>), 1.84–1.78 (2 H, m,  $\beta$ -CH<sub>2</sub>), 1.72–1.67 (2 H, m,  $\beta'$ -CH<sub>2</sub>) and 1.44–1.36 (4 H, m,  $\gamma$ -CH<sub>2</sub>); <sup>13</sup>C{<sup>1</sup>H} NMR (126 MHz, 25.0 °C, CDCl<sub>3</sub>)  $\delta$  146.6 (Ar), 146.0 (triazole), 135.3 (triazole), 134.2 (Ar), 130.3 (2 × ArH), 128.3 (2 × ArH), 28.8 ( $\beta'$ -CH<sub>2</sub>), 27.0 ( $\beta$ -CH<sub>2</sub>), 25.7 ( $\gamma'$ -CH<sub>2</sub>), 24.9 ( $\gamma$ -CH<sub>2</sub>), 24.6 ( $\alpha'$ -CH<sub>2</sub>), 21.9 ( $\alpha$ -CH<sub>2</sub>) and 21.8 (CH<sub>3</sub>); HRMS (ESI-TOF)  $m/z$ : [M+Na]<sup>+</sup> Calcd for C<sub>15</sub>H<sub>19</sub>N<sub>3</sub>NaO<sub>2</sub>S<sup>+</sup> 328.1090; Found 328.1090.

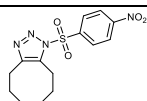

### 1-(4-Nitrobenzene)sulfonyl-4,5,6,7,8,9-hexahydrocycloocta[d][1,2,3]triazole (**20c**)

Cyclooctyne **18** (324 mg, 3.0 mmol, 1.0 equiv.) and 4-nitrobenzenesulfonyl azide (685 mg, 3.0 mmol, 1.0 equiv.) were mixed in CH<sub>2</sub>Cl<sub>2</sub> (7.5 mL) according to General Procedure 1 to give the title compound **20c** (1.00 g, >98%) as a white solid. m.pt. 121–122 °C;  $\nu_{\max}(\text{film})$  3107, 2930, 2857, 1533, 1393, 1348, 1192 and 1173 cm<sup>-1</sup>; <sup>1</sup>H NMR (500 MHz, 25.0 °C, CDCl<sub>3</sub>)  $\delta$  8.41 (2 H, d,  $J$  = 8.9 Hz, ArH), 8.27 (2 H, d,  $J$  = 8.9 Hz, ArH), 3.10–3.05 (2 H, m,  $\alpha$ -CH<sub>2</sub>), 2.87–2.83 (2 H, m,  $\alpha'$ -CH<sub>2</sub>), 1.88–1.82 (2 H, m,  $\beta$ -CH<sub>2</sub>), 1.75–1.68 (2 H, m,  $\beta'$ -CH<sub>2</sub>) and 1.46–1.37 (4 H, m,  $\gamma$ -CH<sub>2</sub>); <sup>13</sup>C{<sup>1</sup>H} NMR (126 MHz, 25.0 °C, CDCl<sub>3</sub>)  $\delta$  151.4 (Ar), 146.4 (triazole), 142.5 (Ar), 136.0 (triazole), 129.8 (2 × ArH), 124.8 (2 × ArH), 28.7 ( $\beta'$ -CH<sub>2</sub>), 27.1 ( $\beta$ -CH<sub>2</sub>), 25.6 ( $\alpha'$ -CH<sub>2</sub>), 24.9 ( $\alpha$ -CH<sub>2</sub>), 24.6 ( $\gamma'$ -CH<sub>2</sub>) and 22.0 ( $\gamma$ -CH<sub>2</sub>); HRMS (ESI-TOF)  $m/z$ : [M+Na]<sup>+</sup> Calcd for C<sub>14</sub>H<sub>16</sub>N<sub>4</sub>NaO<sub>4</sub>S<sup>+</sup> 359.0784; Found 359.0775.

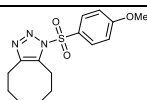

### 1-(4-Methoxybenzene)sulfonyl-4,5,6,7,8,9-hexahydrocycloocta[d][1,2,3]triazole (**20d**)

Cyclooctyne **18** (324 mg, 3.0 mmol, 1.0 equiv.) and 4-methoxybenzenesulfonyl azide (640 mg, 3.0 mmol, 1.0 equiv.) were mixed in CH<sub>2</sub>Cl<sub>2</sub> (7.5 mL) according to General Procedure 1 to give the title compound **20d** (961 mg, >98%) as a white solid. m.pt. 113–114 °C;  $\nu_{\max}(\text{film})$  2928, 2855, 1593, 1576, 1497, 1385, 1265, 1196, 1163 and 1090 cm<sup>-1</sup>; <sup>1</sup>H NMR (500 MHz, 25.0 °C, CDCl<sub>3</sub>)  $\delta$  7.99 (2 H, d,  $J$  = 9.0 Hz, SO<sub>2</sub>Ar), 7.01 (2 H, d,  $J$  = 9.0 Hz, SO<sub>2</sub>Ar), 3.88 (3 H, s, CH<sub>3</sub>), 3.06 (2 H, br t,  $J$  = 6.3 Hz,  $\alpha$ -CH<sub>2</sub>), 2.84 (2 H, br t,  $J$  = 6.4 Hz,  $\alpha'$ -CH<sub>2</sub>), 1.84–1.78 (2 H, m,  $\beta$ -CH<sub>2</sub>), 1.72–1.66 (2 H, m,  $\beta'$ -CH<sub>2</sub>) and 1.44–1.35 (4 H, m,  $\gamma$ -CH<sub>2</sub>); <sup>13</sup>C{<sup>1</sup>H} NMR (126 MHz, 25.0 °C, CDCl<sub>3</sub>)  $\delta$  164.9 (SO<sub>2</sub>Ar), 145.9 (triazole), 135.2 (triazole), 130.8 (2 × SO<sub>2</sub>Ar), 128.2 (SO<sub>2</sub>Ar), 114.9 (2 × SO<sub>2</sub>Ar), 55.9 (OMe), 28.8 ( $\beta'$ -CH<sub>2</sub>), 27.0 ( $\beta$ -CH<sub>2</sub>), 25.7 ( $\gamma'$ -CH<sub>2</sub>), 24.9 ( $\gamma$ -CH<sub>2</sub>), 24.6 ( $\alpha'$ -CH<sub>2</sub>) and 21.9 ( $\alpha$ -CH<sub>2</sub>); HRMS (ESI-TOF)  $m/z$ : [M+Na]<sup>+</sup> Calcd for C<sub>15</sub>H<sub>19</sub>N<sub>3</sub>NaO<sub>3</sub>S<sup>+</sup> 344.1039; Found 344.1039.

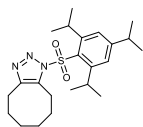

1-(2,4,6-Triisopropylbenzenesulfonyl)-4,5,6,7,8,9-hexahydrocycloocta[d][1,2,3]triazole (**20e**) Cyclooctyne **18** (216 mg, 2.0 mmol, 1.0 equiv.) and 2,4,6-triisopropylbenzenesulfonyl azide (619 mg, 2.0 mmol, 1.0 equiv.) were mixed in CH<sub>2</sub>Cl<sub>2</sub> (5.0 mL) according to General Procedure 1 to give the title compound **20e** (743 mg, 89%) as a white solid. m.pt. 89–92 °C;  $\nu_{\max}$ (film) cm<sup>-1</sup>; <sup>1</sup>H NMR (500 MHz, 25.0 °C, CDCl<sub>3</sub>)  $\delta$  7.22 (2 H, s, ArH), 4.02 (2 H, sept., *J* = 6.7 Hz, *i*Pr), 3.07–3.03 (2 H, m,  $\alpha$ -CH<sub>2</sub>), 2.94 (1 H, sept., *J* = 6.9 Hz, *i*Pr), 2.90–2.86 (2 H, m,  $\alpha'$ -CH<sub>2</sub>), 1.76–1.70 (4 H, m,  $\beta$ -CH<sub>2</sub>), 1.49–1.39 (4 H, m,  $\gamma$ -CH<sub>2</sub>), 1.26 (6 H, d, *J* = 6.9 Hz, *i*Pr) and 1.18 (12 H, d, *J* = 6.9 Hz, *i*Pr); <sup>13</sup>C{<sup>1</sup>H} NMR (126 MHz, 25.0 °C, CDCl<sub>3</sub>)  $\delta$  155.9 (Ar), 152.7 (2  $\times$  Ar), 145.8 (triazole), 134.5 (triazole), 129.8 (Ar), 124.3 (2  $\times$  ArH), 34.4 (*i*Pr), 29.8 (2  $\times$  *i*Pr), 28.7 ( $\beta'$ -CH<sub>2</sub>), 26.5 ( $\beta$ -CH<sub>2</sub>), 25.7 ( $\alpha$ -CH<sub>2</sub>), 25.0 ( $\alpha'$ -CH<sub>2</sub>), 24.6 ( $\gamma'$ -CH<sub>2</sub>), 24.4 (4  $\times$  *i*Pr), 23.4 (2  $\times$  *i*Pr) and 21.7 ( $\gamma$ -CH<sub>2</sub>); HRMS (ESI-TOF) *m/z*: [M+Na]<sup>+</sup> Calcd for C<sub>23</sub>H<sub>35</sub>N<sub>3</sub>NaO<sub>2</sub>S<sup>+</sup> 440.2342; Found 440.2332. Recorded data consistent with previous values.<sup>[3]</sup>

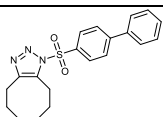

1-(4-Biphenyl)sulfonyl-4,5,6,7,8,9-hexahydrocycloocta[d][1,2,3]triazole (**20f**) Cyclooctyne **18** (324 mg, 3.0 mmol, 1.0 equiv.) and 4-phenylbenzenesulfonyl azide (779 mg, 3.0 mmol, 1.0 equiv.) were mixed in CH<sub>2</sub>Cl<sub>2</sub> (7.5 mL) according to General Procedure 1 to give the title compound **20f** (798 mg, 72%) as a white solid. m.pt. 109–113 °C;  $\nu_{\max}$ (film) 3067, 2928, 2857, 1591, 1389 and 1171 cm<sup>-1</sup>; <sup>1</sup>H NMR (500 MHz, 25.1 °C, CDCl<sub>3</sub>)  $\delta$  8.12 (2 H, d, *J* = 8.6 Hz, ArH), 7.76 (2 H, d, *J* = 8.6 Hz, ArH), 7.60–7.56 (2 H, m, ArH), 7.51–7.41 (3 H, m, ArH), 3.10 (2 H, br t, *J* = 6.3 Hz,  $\alpha$ -CH<sub>2</sub>), 2.86 (2 H, br t, *J* = 6.4 Hz,  $\alpha'$ -CH<sub>2</sub>), 1.87–1.81 (2 H, m,  $\beta$ -CH<sub>2</sub>), 1.75–1.68 (2 H, m,  $\beta'$ -CH<sub>2</sub>) and 1.46–1.37 (4 H, m,  $\gamma$ -CH<sub>2</sub>); <sup>13</sup>C{<sup>1</sup>H} NMR (126 MHz, 25.0 °C, CDCl<sub>3</sub>)  $\delta$  148.2 (Ar), 146.1 (triazole), 138.5 (Ar), 135.5 (Ar), 135.5 (triazole), 129.2 (2  $\times$  ArH), 129.1 (Ar), 128.8 (2  $\times$  ArH), 128.2 (2  $\times$  ArH), 127.4 (2  $\times$  ArH), 28.8 ( $\beta'$ -CH<sub>2</sub>), 27.1 ( $\beta$ -CH<sub>2</sub>), 25.7 ( $\gamma'$ -CH<sub>2</sub>), 25.0 ( $\gamma$ -CH<sub>2</sub>), 24.6 ( $\alpha'$ -CH<sub>2</sub>) and 22.0 ( $\alpha$ -CH<sub>2</sub>); HRMS (ESI-TOF) *m/z*: [M+Na]<sup>+</sup> Calcd for C<sub>20</sub>H<sub>21</sub>N<sub>3</sub>NaO<sub>2</sub>S<sup>+</sup> 390.1247; Found 390.1235.

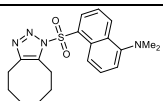

1-(5-Dimethylaminonaphth-1-yl)sulfonyl-4,5,6,7,8,9-hexahydrocycloocta[d][1,2,3]triazole (**20g**) Cyclooctyne **18** (324 mg, 3.0 mmol, 1.0 equiv.) and 4-biphenylsulfonyl azide (829 mg, 3.0 mmol, 1.0 equiv.) were mixed in CH<sub>2</sub>Cl<sub>2</sub> (7.5 mL) according to General Procedure 1 to give the title compound **20g** (1.08 g, 94%) as a yellow solid. m.pt. 116–118 °C;  $\nu_{\max}$ (film) 2928, 2857, 2791, 1568, 1454, 1381, 1202, 1186, 1171 and 1153 cm<sup>-1</sup>; <sup>1</sup>H NMR (500 MHz, 25.1 °C, CDCl<sub>3</sub>)  $\delta$  8.68 (1 H, dt, *J* = 8.5, 1.0 Hz, Dansyl Ar), 8.51 (1 H, dd, *J* = 7.5, 1.3 Hz, Dansyl Ar), 8.40 (1 H, d, *J* = 8.7 Hz, Dansyl Ar), 7.61 (1 H, dd, *J* = 8.5, 7.5 Hz, Dansyl Ar), 7.55 (1 H, dd, *J* = 8.7, 7.6 Hz, Dansyl Ar), 7.17 (1 H, dd, *J* = 7.6, 1.0 Hz, Dansyl Ar), 2.95 (2 H, br t, *J* = 6.3 Hz,  $\alpha$ -CH<sub>2</sub>), 2.85 (6 H, s, NMe<sub>2</sub>), 2.80 (2 H, br t, *J* = 6.4 Hz,  $\alpha'$ -CH<sub>2</sub>), 1.70–1.62 (4 H, m,  $\beta$ -CH<sub>2</sub>) and 1.37–1.30 (4 H, m,  $\gamma$ -CH<sub>2</sub>); <sup>13</sup>C{<sup>1</sup>H} NMR (126 MHz, 25.0 °C, CDCl<sub>3</sub>)  $\delta$  152.0 (Dansyl Ar), 146.0 (triazole), 135.0 (triazole), 133.5 (Dansyl Ar), 132.1 (Dansyl Ar), 131.3 (Dansyl Ar), 129.8 (Dansyl Ar), 129.8 (Dansyl Ar), 129.6 (Dansyl Ar), 122.9 (Dansyl Ar), 118.3 (Dansyl Ar), 116.0 (Dansyl Ar), 45.4 (2  $\times$  CH<sub>3</sub>), 28.5 ( $\beta'$ -CH<sub>2</sub>), 26.6 ( $\beta$ -CH<sub>2</sub>), 25.6 ( $\gamma'$ -CH<sub>2</sub>), 24.9 ( $\gamma$ -CH<sub>2</sub>), 24.5 ( $\alpha'$ -CH<sub>2</sub>) and 22.0 ( $\alpha$ -CH<sub>2</sub>); HRMS (ESI-TOF) *m/z*: [M+Na]<sup>+</sup> Calcd for C<sub>20</sub>H<sub>24</sub>N<sub>4</sub>NaO<sub>2</sub>S<sup>+</sup> 407.1512; Found 407.1512.

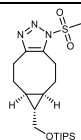

(5a*S*\*,6*S*\*,6a*R*\*)-1-Methanesulfonyl-6-triisopropylsilyloxymethyl-1,4,5,5a,6,6a,7,8-octahydrocyclopropa[5,6]cycloocta[1,2-d][1,2,3]triazole (**21a**) Bicyclononyne **19** (50 mg, 0.16 mmol, 1.0 equiv.) and methanesulfonyl azide (20 mg, 0.16 mmol, 1.0 equiv.) were mixed in CH<sub>2</sub>Cl<sub>2</sub> (410  $\mu$ L) according to General Procedure 1 to give the title compound **21a** (69 mg, >98%) as a colourless oil.  $\nu_{\max}$ (film) 2941, 2864, 1379, 1193, 1179, 1103 and 1066 cm<sup>-1</sup>; <sup>1</sup>H NMR (400 MHz, 20.7 °C, CDCl<sub>3</sub>)  $\delta$  3.65–3.56 (2 H, m, CH<sub>2</sub>OTIPS), 3.55 (3 H, s, CH<sub>3</sub>), 3.32 (1 H, ddd, *J* = 16.7, 7.1, 3.6 Hz, CH<sub>2</sub>), 3.08–2.99 (2 H, m, CH<sub>2</sub>), 2.92 (1 H, ddd, *J* = 15.9, 9.2, 4.2 Hz, CH<sub>2</sub>), 2.50–2.41 (1 H, m, CH<sub>2</sub>), 2.40–2.32 (1 H, m, CH<sub>2</sub>), 1.56–1.42 (2 H, m, CH<sub>2</sub>), 1.08–1.01 (21 H, m, 3  $\times$  *i*Pr), 0.81–0.74 (2 H, m, cyclopropane CH) and 0.71–0.64 (1 H, m, cyclopropane CH); <sup>13</sup>C{<sup>1</sup>H} NMR (101 MHz, 21.4 °C, CDCl<sub>3</sub>)  $\delta$  146.1 (triazole), 136.0 (triazole), 65.9 (CH<sub>2</sub>OTIPS), 42.9 (CH<sub>3</sub>), 28.1 (cyclopropane CH), 27.2 (CH<sub>2</sub>), 26.6 (CH<sub>2</sub>), 25.1 (CH<sub>2</sub>), 22.8 (CH<sub>2</sub>), 21.3 (cyclopropane CH), 20.6 (cyclopropane CH), 18.0 (6  $\times$  *i*Pr) and 12.0 (3  $\times$  *i*Pr); HRMS (ESI-TOF) *m/z*: [M+Na]<sup>+</sup> Calcd for C<sub>20</sub>H<sub>37</sub>N<sub>3</sub>NaO<sub>3</sub>SSi<sup>+</sup> 450.2217; Found 450.2206.



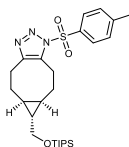

*(5aS\*,6S\*,6aR\*)-1-(4-Tolyl)sulfonyl-6-triisopropylsilyloxymethyl-1,4,5,5a,6,6a,7,8-octahydrocyclopropa[5,6]cycloocta[1,2-d][1,2,3]triazole (21b)*

Bicyclononyne **19** (50 mg, 0.16 mmol, 1.0 equiv.) and 4-toluenesulfonyl azide (32 mg, 0.16 mmol, 1.0 equiv.) were mixed in CH<sub>2</sub>Cl<sub>2</sub> (410 μL) according to General Procedure 1 to give the title compound **21b** (81 mg, >98%) as a colourless oil.  $\nu_{\max}$ (film) 2941, 2864, 1389, 1196, 1177, 1092 and 1065 cm<sup>-1</sup>; <sup>1</sup>H NMR (400 MHz, 25.5 °C, CDCl<sub>3</sub>)  $\delta$  7.92 (2 H, d, *J* = 8.2 Hz, Ts Ar), 7.36 (2 H, d, *J* = 8.2 Hz, Ts Ar), 3.59 (1 H, dd, *J* = 10.5, 5.5 Hz, CH<sub>A</sub>OTIPS), 3.53 (1 H, dd, *J* = 10.5, 5.7 Hz, CH<sub>B</sub>OTIPS), 3.30 (1 H, dd, *J* = 7.2, 3.7 Hz, CH<sub>A</sub>), 3.03–2.92 (2 H, m, CH<sub>2</sub>), 2.85 (1 H, ddd, *J* = 15.8, 9.2, 4.2 Hz, CH<sub>B</sub>), 2.44 (3 H, s, CH<sub>3</sub>), 2.43–2.27 (2 H, m, CH<sub>2</sub>), 1.48–1.30 (2 H, m, CH<sub>2</sub>), 1.10–0.98 (21 H, m, 3 × *i*Pr) and 0.77–0.59 (3 H, m, cyclopropane CH); <sup>13</sup>C{<sup>1</sup>H} NMR (101 MHz, 24.8 °C, CDCl<sub>3</sub>)  $\delta$  146.6 (Ts Ar), 146.2 (triazole), 135.8 (triazole), 134.2 (Ts Ar), 130.3 (2 × Ts Ar), 128.4 (2 × Ts Ar), 65.9 (CH<sub>2</sub>OTIPS), 28.2 (cyclopropane CH), 27.3 (CH<sub>2</sub>), 26.8 (CH<sub>2</sub>), 25.1 (CH<sub>2</sub>), 22.7 (CH<sub>2</sub>), 21.8 (CH<sub>3</sub>), 21.4 (cyclopropane CH), 20.7 (cyclopropane CH), 18.0 (6 × *i*Pr) and 12.0 (3 × *i*Pr); HRMS (ESI-TOF) *m/z*: [M+Na]<sup>+</sup> Calcd for C<sub>26</sub>H<sub>41</sub>N<sub>3</sub>NaO<sub>3</sub>SSi<sup>+</sup> 526.2530; Found 526.2526.

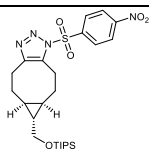

*(5aS\*,6S\*,6aR\*)-1-(4-Nitrobenzene)sulfonyl-6-triisopropylsilyloxymethyl-1,4,5,5a,6,6a,7,8-octahydrocyclopropa[5,6]cycloocta[1,2-d][1,2,3]triazole (21c)*

Bicyclononyne **19** (50 mg, 0.16 mmol, 1.0 equiv.) and 4-nitrobenzenesulfonyl azide (37 mg, 0.16 mmol, 1.0 equiv.) were mixed in CH<sub>2</sub>Cl<sub>2</sub> (410 μL) according to General Procedure 1 to give the title compound **21c** (84 mg, 96%) as a white waxy solid. m.pt. 136 °C dec.  $\nu_{\max}$ (film) 2941, 2864, 1537, 1406, 1349, 1198, 1184, 1090 and 1067 cm<sup>-1</sup>; <sup>1</sup>H NMR (400 MHz, 27.0 °C, CDCl<sub>3</sub>)  $\delta$  8.41 (2 H, d, *J* = 9.1 Hz, Ns Ar), 8.26 (2 H, d, *J* = 9.1 Hz, Ns Ar), 3.62 (1 H, dd, *J* = 10.6, 5.5 Hz, CH<sub>A</sub>OTIPS), 3.55 (1 H, dd, *J* = 10.6, 5.8 Hz, CH<sub>B</sub>OTIPS), 3.30 (1 H, ddd, *J* = 16.7, 7.1, 3.7 Hz, CH<sub>A</sub>), 3.07–2.94 (2 H, m, CH<sub>2</sub>), 2.93–2.82 (1 H, m, CH<sub>B</sub>), 2.50–2.40 (1 H, m, CH<sub>2</sub>), 2.39–2.28 (1 H, m, CH<sub>2</sub>), 1.52–1.37 (2 H, m, CH<sub>2</sub>), 1.07–0.98 (21 H, m, 3 × *i*Pr) and 0.79–0.61 (3 H, m, cyclopropane CH); <sup>13</sup>C{<sup>1</sup>H} NMR (101 MHz, 27.0 °C, CDCl<sub>3</sub>)  $\delta$  151.4 (Ns Ar), 146.5 (triazole), 142.5 (Ns Ar), 136.4 (triazole), 129.9 (2 × Ns Ar), 124.8 (2 × Ns Ar), 65.7 (CH<sub>2</sub>OTIPS), 28.2 (cyclopropane CH), 27.1 (CH<sub>2</sub>), 26.7 (CH<sub>2</sub>), 25.1 (CH<sub>2</sub>), 22.9 (CH<sub>2</sub>), 21.2 (cyclopropane CH), 20.5 (cyclopropane CH), 18.0 (6 × *i*Pr) and 12.0 (3 × *i*Pr); HRMS (ESI-TOF) *m/z*: [M+Na]<sup>+</sup> Calcd for C<sub>25</sub>H<sub>38</sub>N<sub>4</sub>NaO<sub>5</sub>SSi<sup>+</sup> 557.2224; Found 557.2204.

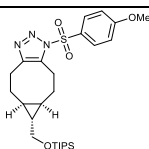

*(5aS\*,6S\*,6aR\*)-1-(4-Methoxybenzene)sulfonyl-6-triisopropylsilyloxymethyl-1,4,5,5a,6,6a,7,8-octahydrocyclopropa[5,6]cycloocta[1,2-d][1,2,3]triazole (21d)*

Bicyclononyne **19** (50 mg, 0.16 mmol, 1.0 equiv.) and 4-methoxybenzenesulfonyl azide (35 mg, 0.16 mmol, 1.0 equiv.) were mixed in CH<sub>2</sub>Cl<sub>2</sub> (410 μL) according to General Procedure 1 to give the title compound **21d** (84 mg, >98%) as a colourless oil.  $\nu_{\max}$ (film) 2941, 2864, 1593, 1578, 1389, 1267, 1198, 1169, 1094, 1065 and 1020 cm<sup>-1</sup>; <sup>1</sup>H NMR (400 MHz, 20.8 °C, CDCl<sub>3</sub>)  $\delta$  7.98 (2 H, d, *J* = 9.0 Hz, SO<sub>2</sub>Ar), 7.01 (2 H, d, *J* = 9.0 Hz, SO<sub>2</sub>Ar), 3.80 (3 H, s, OMe), 3.59 (1 H, dd, *J* = 10.5, 5.6 Hz, CH<sub>A</sub>OTIPS), 3.53 (1 H, dd, *J* = 10.5, 5.9 Hz, CH<sub>B</sub>OTIPS), 3.29 (1 H, ddd, *J* = 16.5, 7.2, 3.6 Hz, CH<sub>A</sub>), 3.03–2.92 (2 H, m, CH<sub>2</sub>), 2.84 (1 H, ddd, *J* = 15.9, 9.2, 4.1 Hz, CH<sub>B</sub>), 2.46–2.36 (1 H, m, CH<sub>2</sub>), 2.37–2.36 (1 H, m, CH<sub>2</sub>), 1.47–1.30 (2 H, m, CH<sub>2</sub>), 1.09–0.98 (21 H, m, 3 × *i*Pr) and 0.77–0.59 (3 H, m, cyclopropane CH); <sup>13</sup>C{<sup>1</sup>H} NMR (101 MHz, 21.4 °C, CDCl<sub>3</sub>)  $\delta$  164.9 (SO<sub>2</sub>Ar), 146.2 (triazole), 135.6 (triazole), 130.9 (2 × SO<sub>2</sub>Ar), 128.1 (SO<sub>2</sub>Ar), 114.9 (2 × SO<sub>2</sub>Ar), 65.9 (CH<sub>2</sub>OTIPS), 55.9 (OMe), 28.2 (cyclopropane CH), 27.3 (CH<sub>2</sub>), 26.8 (CH<sub>2</sub>), 25.1 (CH<sub>2</sub>), 22.7 (CH<sub>2</sub>), 21.4 (cyclopropane CH), 20.8 (cyclopropane CH), 18.0 (6 × *i*Pr) and 12.0 (3 × *i*Pr); HRMS (ESI-TOF) *m/z*: [M+Na]<sup>+</sup> Calcd for C<sub>26</sub>H<sub>41</sub>N<sub>3</sub>NaO<sub>4</sub>SSi<sup>+</sup> 542.2479; Found 542.2470.

## General Procedure 2

Sulfonyl triazole (1.0 equiv.) was dissolved in PhMe (0.04 M) in a flame dried vial under argon.  $\text{Rh}_2(\text{OAc})_4$  (5 mol%) was added and the vial sealed with a Teflon cap and heated to 50 °C (aluminium block) until complete conversion of starting material was observed by TLC (0.5 – 2 h). The reaction mixture was cooled to ambient temperature and diluted with THF (0.5 reaction volumes).  $\text{LiAlH}_4$  (1.5 equiv.) was added in one portion and the reaction stirred at this temperature for 15 min. The reaction was quenched by consecutive addition of water, 1 M aqueous NaOH, a further portion of water and stirred for 5 min. Anhydrous  $\text{MgSO}_4$  was added and the reaction mixture filtered, concentrated *in vacuo* and purified by flash column chromatography (silica gel, gradient 5–30% EtOAc in petroleum ether) to afford the sulfonamide.

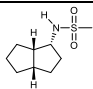

**(1R\*,3aS\*,6aS\*)-1-Methanesulfonylaminooctahydropentalene (22a).** Triazole **20a** (46 mg, 0.20 mmol, 1.0 equiv.) was treated according to General Procedure 2 with  $\text{Rh}_2(\text{OAc})_4$  (4 mg, 10  $\mu\text{mol}$ , 5.0 mol %) in PhMe (10 mL) at 50 °C then  $\text{LiAlH}_4$  (15 mg, 0.40 mmol, 2.0 equiv.) and THF (5.0 mL) to give the title compound **22a** (18 mg, 44%) as a colourless wax. m.pt. 64–67 °C;  $\nu_{\text{max}}(\text{film})$  3275, 2945, 2864, 1312, 1153 and 1132  $\text{cm}^{-1}$ ;  $^1\text{H}$  NMR (500 MHz, 25.0 °C,  $\text{CDCl}_3$ )  $\delta$  4.28 (1 H, d,  $J = 8.3$  Hz, NH), 3.73–3.61 (1 H, m, CH), 2.91 (3 H, s,  $\text{CH}_3$ ), 2.56–2.46 (1 H, m, CH), 2.44–2.34 (1 H, m, CH), 1.95–1.85 (1 H, m,  $\text{CH}_2$ ), 1.85–1.78 (1 H, m,  $\text{CH}_2$ ), 1.68–1.54 (2 H, m,  $\text{CH}_2$ ), 1.44–1.15 (5 H, m,  $\text{CH}_2$ ) and 1.11–1.00 (1 H, m,  $\text{CH}_2$ );  $^{13}\text{C}\{^1\text{H}\}$  NMR (126 MHz, 25.0 °C,  $\text{CDCl}_3$ )  $\delta$  57.3 (CH), 45.9 (CH), 41.4 (CH), 41.4 (Ms  $\text{CH}_3$ ), 35.6 ( $\text{CH}_2$ ), 31.0 ( $\text{CH}_2$ ), 29.5 ( $\text{CH}_2$ ), 28.2 ( $\text{CH}_2$ ) and 27.4 ( $\text{CH}_2$ ); HRMS (ESI-TOF)  $m/z$ :  $[\text{M}+\text{Na}]^+$  Calcd for  $\text{C}_9\text{H}_{17}\text{NNaO}_2\text{S}^+$  226.0872; Found 226.0872.

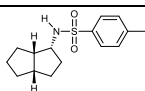

**(1R\*,3aS\*,6aS\*)-1-(4-Tolyl)sulfonylaminooctahydropentalene (22b).** Triazole **20b** (61 mg, 0.20 mmol, 1.0 equiv.) was treated according to General Procedure 2 with  $\text{Rh}_2(\text{OAc})_4$  (4 mg, 10  $\mu\text{mol}$ , 5.0 mol %) in PhMe (10 mL) at 50 °C then  $\text{LiAlH}_4$  (15 mg, 0.40 mmol, 2.0 equiv.) and THF (5.0 mL) to give the title compound **22b** (34 mg, 61%) as a colourless oil.  $\nu_{\text{max}}(\text{film})$  3277, 2943, 2862, 1319, 1306, 1288, 1157 and 1094  $\text{cm}^{-1}$ ;  $^1\text{H}$  NMR (400 MHz, 24.9 °C,  $\text{CDCl}_3$ )  $\delta$  7.77 (2 H, d,  $J = 7.9$  Hz, ArH), 7.29 (2 H, d,  $J = 7.9$  Hz, ArH), 4.52 (1 H, d,  $J = 8.2$  Hz, NH), 3.59–3.50 (1 H, m, CH), 2.43 (3 H, s,  $\text{CH}_3$ ), 2.37–2.28 (2 H, m, CH), 1.90–1.82 (1 H, m,  $\text{CH}_2$ ), 1.66–1.39 (4 H, m,  $\text{CH}_2$ ), 1.31–1.14 (4 H, m,  $\text{CH}_2$ ) and 1.08–1.00 (1 H, m,  $\text{CH}_2$ );  $^{13}\text{C}\{^1\text{H}\}$  NMR (101 MHz, 25.0 °C,  $\text{CDCl}_3$ )  $\delta$  143.2 (Ar), 138.0 (Ar), 129.6 (2  $\times$  ArH), 127.1 (2  $\times$  ArH), 57.1 (CH), 45.5 (CH), 41.3 (CH), 35.5 ( $\text{CH}_2$ ), 30.6 ( $\text{CH}_2$ ), 29.4 ( $\text{CH}_2$ ), 28.1 ( $\text{CH}_2$ ), 27.3 ( $\text{CH}_2$ ) and 21.5 ( $\text{CH}_2$ ); HRMS (ESI-TOF)  $m/z$ :  $[\text{M}+\text{Na}]^+$  Calcd for  $\text{C}_{15}\text{H}_{21}\text{NNaO}_2\text{S}^+$  302.1185; Found 302.1180. Recorded data consistent with previous values.<sup>[4]</sup>

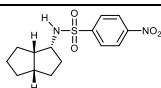

**(1R\*,3aS\*,6aS\*)-1-(4-Nitrobenzene)sulfonylaminooctahydropentalene (22c).** Triazole **20c** (67 mg, 0.20 mmol, 1.0 equiv.) was treated according to General Procedure 2 with  $\text{Rh}_2(\text{OAc})_4$  (4 mg, 10  $\mu\text{mol}$ , 5.0 mol %) in PhMe (10 mL) at 50 °C then  $\text{LiAlH}_4$  (15 mg, 0.40 mmol, 2.0 equiv.) and THF (5.0 mL) to give the title compound **22c** (5 mg, 8%) as a yellow oil.  $\nu_{\text{max}}(\text{film})$  3277, 2947, 2866, 1530, 1348, 1312, 1163 and 1094  $\text{cm}^{-1}$ ;  $^1\text{H}$  NMR (500 MHz, 25.0 °C,  $\text{CDCl}_3$ )  $\delta$  8.29 (2 H, d,  $J = 8.9$  Hz, Ns Ar), 8.01 (2 H, d,  $J = 8.9$  Hz, Ns Ar), 4.64 (1 H, d,  $J = 8.4$  Hz, NH), 3.61–3.52 (1 H, m, CH), 2.36–2.24 (2 H, m, CH), 1.87–1.78 (1 H, m,  $\text{CH}_2$ ), 1.64–1.58 (1 H, m,  $\text{CH}_2$ ), 1.56–1.46 (2 H, m,  $\text{CH}_2$ ), 1.41–1.33 (1 H, m,  $\text{CH}_2$ ), 1.33–1.12 (3 H, m,  $\text{CH}_2$ ) and 1.10–0.96 (2 H, m,  $\text{CH}_2$ );  $^{13}\text{C}\{^1\text{H}\}$  NMR (126 MHz, 25.0 °C,  $\text{CDCl}_3$ )  $\delta$  150.0 (Ns Ar), 147.0 (Ns Ar), 128.3 (2  $\times$  Ns Ar), 124.4 (2  $\times$  Ns Ar), 57.4 (CH), 45.6 (CH), 41.3 (CH), 35.5 ( $\text{CH}_2$ ), 30.7 ( $\text{CH}_2$ ), 29.3 ( $\text{CH}_2$ ), 28.1 ( $\text{CH}_2$ ) and 27.3 ( $\text{CH}_2$ ); HRMS (ESI-TOF)  $m/z$ :  $[\text{M}+\text{Na}]^+$  Calcd for  $\text{C}_{14}\text{H}_{18}\text{N}_2\text{NaO}_4\text{S}^+$  333.0879; Found 333.0879.

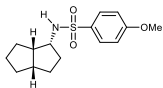

**(1R\*,3aS\*,6aS\*)-1-(4-Methoxybenzene)sulfonylaminoctahydropentalene (22d)**

Triazole **20d** (64 mg, 0.20 mmol, 1.0 equiv.) was treated according to General Procedure 2 with  $\text{Rh}_2(\text{OAc})_4$  (4 mg, 10  $\mu\text{mol}$ , 5.0 mol %) in PhMe (10 mL) at 50 °C then  $\text{LiAlH}_4$  (15 mg, 0.40 mmol, 2.0 equiv.) and THF (5.0 mL) to give the title compound **22d** (45 mg, 77%) as a colourless oil.  $\nu_{\text{max}}(\text{film})$  3257, 2945, 2864, 1597, 1499, 1302, 1258, 1153 and 1096  $\text{cm}^{-1}$ ;  $^1\text{H NMR}$  (500 MHz, 25.0 °C,  $\text{CDCl}_3$ )  $\delta$  7.82 (2 H, d,  $J = 8.9$  Hz, ArH), 6.96 (2 H, d,  $J = 8.9$  Hz, ArH), 4.52 (1 H, d,  $J = 8.3$  Hz, NH), 3.87 (3 H, s,  $\text{CH}_3$ ), 3.57–3.47 (1 H, m, CH), 2.38–2.27 (2 H, m, 2  $\times$  CH), 1.90–1.82 (1 H, m,  $\text{CH}_2$ ), 1.65–1.59 (1 H, m,  $\text{CH}_2$ ), 1.59–1.48 (2 H, m,  $\text{CH}_2$ ), 1.47–1.40 (1 H, m,  $\text{CH}_2$ ), 1.58–1.11 (4 H, m,  $\text{CH}_2$ ) and 1.08–1.00 (1 H, m,  $\text{CH}_2$ );  $^{13}\text{C}\{^1\text{H}\}$  NMR (126 MHz, 25.0 °C,  $\text{CDCl}_3$ )  $\delta$  162.7 (Ar), 132.6 (Ar), 129.2 (2  $\times$  ArH), 114.1 (2  $\times$  Ar), 57.1 (CH), 55.6 (CH), 45.5 ( $\text{CH}_3$ ), 41.3 (CH), 35.5 ( $\text{CH}_2$ ), 30.6 ( $\text{CH}_2$ ), 29.4 ( $\text{CH}_2$ ), 28.1 ( $\text{CH}_2$ ) and 27.3 ( $\text{CH}_2$ ); HRMS (ESI-TOF)  $m/z$ :  $[\text{M}+\text{Na}]^+$  Calcd for  $\text{C}_{15}\text{H}_{21}\text{NNaO}_3\text{S}^+$  318.1134; Found 318.1134.

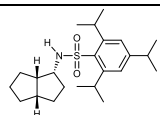

**(1R\*,3aS\*,6aS\*)-1-(2,4,6-Triisopropylbenzene)sulfonylaminoctahydropentalene (22e)**

Triazole **20e** (84 mg, 0.20 mmol, 1.0 equiv.) was treated according to General Procedure 2 with  $\text{Rh}_2(\text{OAc})_4$  (4 mg, 10  $\mu\text{mol}$ , 5.0 mol %) in PhMe (10 mL) at 50 °C then  $\text{LiAlH}_4$  (15 mg, 0.40 mmol, 2.0 equiv.) and THF (5.0 mL) to give the title compound **22e** (28 mg, 36%) as a colourless oil.  $\nu_{\text{max}}(\text{film})$  3271, 2953, 2866 and 1152  $\text{cm}^{-1}$ ;  $^1\text{H NMR}$  (500 MHz, 24.9 °C,  $\text{CDCl}_3$ )  $\delta$  7.15 (2 H, s, ArH), 4.36 (1 H, d,  $J = 8.1$  Hz, NH), 4.18 (2 H, sept.,  $J = 6.7$  Hz,  $i\text{Pr}$ ), 3.60–3.50 (1 H, m, CH), 2.88 (1 H, sept.,  $J = 6.7$  Hz,  $i\text{Pr}$ ), 2.53–2.45 (1 H, m, CH), 2.42–2.32 (1 H, m, CH), 1.94–1.86 (1 H, m,  $\text{CH}_2$ ), 1.68–1.49 (4 H, m,  $\text{CH}_2$ ), 1.36–1.30 (2 H, m,  $\text{CH}_2$ ), 1.27 (6 H, d,  $J = 6.7$  Hz, 2  $\times$   $i\text{Pr}$ ), 1.25 (12 H, d,  $J = 6.7$  Hz, 4  $\times$   $i\text{Pr}$ ) and 1.11–1.03 (3 H, m,  $\text{CH}_2$ );  $^{13}\text{C}\{^1\text{H}\}$  NMR (126 MHz, 25.0 °C,  $\text{CDCl}_3$ )  $\delta$  152.5 (Ar), 150.2 (2  $\times$  Ar), 133.1 (Ar), 123.7 (2  $\times$  ArH), 56.7 (CH), 46.1 (CH), 41.1 (CH), 35.6 ( $\text{CH}_2$ ), 34.1 ( $i\text{Pr}$ ), 30.6 ( $\text{CH}_2$ ), 29.6 (2  $\times$   $i\text{Pr}$ ), 29.5 ( $\text{CH}_2$ ), 28.2 ( $\text{CH}_2$ ), 27.4 ( $\text{CH}_2$ ), 24.9 (2  $\times$   $i\text{Pr}$ ), 24.8 (2  $\times$   $i\text{Pr}$ ) and 23.6 (2  $\times$   $i\text{Pr}$ ); HRMS (ESI-TOF)  $m/z$ :  $[\text{M}+\text{Na}]^+$  Calcd for  $\text{C}_{23}\text{H}_{37}\text{NNaO}_2\text{S}^+$  414.2437; Found 414.2425.

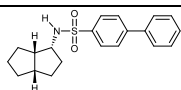

**(1R\*,3aS\*,6aS\*)-1-(4-Biphenyl)sulfonylaminoctahydropentalene (22f)**

Triazole **20f** (74 mg, 0.20 mmol, 1.0 equiv.) was treated according to General Procedure 2 with  $\text{Rh}_2(\text{OAc})_4$  (4 mg, 10  $\mu\text{mol}$ , 5.0 mol %) in PhMe (10 mL) at 50 °C then  $\text{LiAlH}_4$  (15 mg, 0.40 mmol, 2.0 equiv.) and THF (5.0 mL) to give the title compound **22f** (38 mg, 55%) as a colourless wax. m.pt. 146–149 °C;  $\nu_{\text{max}}(\text{film})$  3277, 2947, 2864, 1321, 1159 and 1098  $\text{cm}^{-1}$ ;  $^1\text{H NMR}$  (500 MHz, 25.0 °C,  $\text{CDCl}_3$ )  $\delta$  7.95 (2 H, d,  $J = 8.4$  Hz, ArH), 7.65–7.60 (2 H, m, ArH), 7.51–7.46 (2 H, m, ArH), 7.42 (2 H, d,  $J = 8.4$  Hz, ArH), 7.43–7.39 (1 H, m, ArH), 4.57 (1 H, d,  $J = 8.3$  Hz, NH), 3.65–3.58 (1 H, m, CH), 2.41–2.31 (2 H, m, 2  $\times$  CH), 1.92–1.85 (1 H, m,  $\text{CH}_2$ ), 1.72–1.65 (1 H, m,  $\text{CH}_2$ ), 1.62–1.44 (3 H, m,  $\text{CH}_2$ ), 1.38–1.14 (4 H, m,  $\text{CH}_2$ ) and 1.11–0.98 (1 H, m,  $\text{CH}_2$ );  $^{13}\text{C}\{^1\text{H}\}$  NMR (126 MHz, 25.0 °C,  $\text{CDCl}_3$ )  $\delta$  145.4 (Ar), 139.5 (Ar), 139.3 (Ar), 129.0 (2  $\times$  ArH), 128.4 (Ar), 127.6 (2  $\times$  ArH), 127.6 (2  $\times$  ArH), 127.3 (2  $\times$  ArH), 57.2 (CH), 45.6 (CH), 41.3 (CH), 35.5 ( $\text{CH}_2$ ), 30.7 ( $\text{CH}_2$ ), 29.4 ( $\text{CH}_2$ ), 28.1 ( $\text{CH}_2$ ) and 27.3 ( $\text{CH}_2$ ); HRMS (ESI-TOF)  $m/z$ :  $[\text{M}+\text{Na}]^+$  Calcd for  $\text{C}_{20}\text{H}_{23}\text{NNaO}_2\text{S}^+$  364.1342; Found 364.1342.

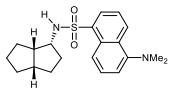

**(1R\*,3aS\*,6aS\*)-1-(5-Dimethylaminonaphth-1-yl)sulfonylaminooctahydropentalene (22g)**

Triazole **20g** (77 mg, 0.20 mmol, 1.0 equiv.) was treated according to General Procedure 2 with  $\text{Rh}_2(\text{OAc})_4$  (4 mg, 10  $\mu\text{mol}$ , 5.0 mol %) in PhMe (10 mL) at 50 °C then  $\text{LiAlH}_4$  (15 mg, 0.40 mmol, 2.0 equiv.) and THF (5.0 mL) to give the title compound **22g** (54 mg, 76%) as a yellow oil.  $\nu_{\text{max}}(\text{film})$  3288, 2943, 2864, 2787, 1452, 1310, 1159 and 1144  $\text{cm}^{-1}$ ;  $^1\text{H NMR}$  (500 MHz, 25.0 °C,  $\text{CDCl}_3$ )  $\delta$  8.53 (1 H, d,  $J = 8.5$  Hz, Dansyl Ar), 8.32–8.24 (2 H, m, Dansyl Ar), 7.56 (1 H, dd,  $J = 8.6, 7.5$  Hz, Dansyl Ar), 7.52 (1 H, dd,  $J = 8.5, 7.3$  Hz, Dansyl Ar), 7.18 (1 H, d,  $J = 7.5$  Hz, Dansyl Ar), 4.68 (1 H, d,  $J = 8.3$  Hz, NH), 3.55–3.47 (1 H, m, CH), 2.89 (6 H, s,  $\text{CH}_3$ ), 2.31–2.23 (1 H, m, CH), 2.22–2.13 (1 H, m, CH), 1.84–1.75 (1 H, m,  $\text{CH}_2$ ), 1.54–1.41 (4 H, m,  $\text{CH}_2$ ), 1.30–1.04 (4 H, m,  $\text{CH}_2$ ) and 1.02–0.96 (1 H, m,  $\text{CH}_2$ );  $^{13}\text{C}\{^1\text{H}\}$  NMR (126 MHz, 25.0 °C,  $\text{CDCl}_3$ )  $\delta$  152.0 (Dansyl Ar), 135.6 (Dansyl Ar), 130.3 (Dansyl Ar), 129.8 (Dansyl Ar), 129.7 (Dansyl Ar), 129.4 (Dansyl Ar), 128.2 (Dansyl Ar), 123.2 (Dansyl Ar), 118.8 (Dansyl Ar), 115.1 (Dansyl Ar), 57.3 (CH), 45.5 (2  $\times$   $\text{CH}_3$ ), 45.4 (CH), 41.1 (CH), 35.5 ( $\text{CH}_2$ ), 30.5 ( $\text{CH}_2$ ), 29.3 ( $\text{CH}_2$ ), 27.9 ( $\text{CH}_2$ ) and 27.2 ( $\text{CH}_2$ ); HRMS (ESI-TOF)  $m/z$ :  $[\text{M}+\text{Na}]^+$  Calcd for  $\text{C}_{20}\text{H}_{26}\text{N}_2\text{NaO}_2\text{S}^+$  381.1607; Found 381.1601.

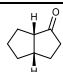

**(3aS,6aS)-1-Oxohexahydropentalene (23)**

In a flame-dried flask under argon, triazole **20c** (750 mg, 2.23 mmol, 1.0 equiv.) was dissolved in  $\text{C}_6\text{F}_6$  (55.8 mL).  $\text{Rh}_2(\text{S-NTTL})_4$  (162 mg, 5 mol %) was added and the reaction heated to 50 °C (oil bath) for 1 h. The reaction was cooled to ambient temperature and basic alumina (22.3 g, pH 9.5, Brockmann activity III, *i.e.* 6 wt %  $\text{H}_2\text{O}$ ) was added and the mixture vigorously stirred for 15 min. Filtration through celite and concentration *in vacuo* afforded a residue that was purified by flash column chromatography (silica, gradient from 2–10% ethyl acetate in petrol) to give the title compound (238 mg, 1.92 mmol, 86%) as a volatile colourless oil.  $\alpha_{\text{D}}^{23.5} +159$  (c 1.1, EtOH), Lit.  $\alpha_{\text{D}}^{23.0} +116$  (c 1.3, EtOH);  $\nu_{\text{max}}(\text{film})$  2951, 2870 and 1732  $\text{cm}^{-1}$ ;  $^1\text{H NMR}$  (500 MHz, 25.0 °C,  $\text{CDCl}_3$ )  $\delta$  2.81–2.73 (1 H, m, CH), 2.54 (1 H, td,  $J = 9.4, 4.4$  Hz, CH), 2.29–2.24 (2 H, m,  $\text{CH}_2$ ), 2.16–2.07 (1 H, m,  $\text{CH}_2$ ), 1.90–1.76 (3 H, m,  $\text{CH}_2$ ), 1.64–1.49 (3 H, m,  $\text{CH}_2$ ) and 1.45–1.38 (1 H, m,  $\text{CH}_2$ );  $^{13}\text{C}\{^1\text{H}\}$  NMR (101 MHz, 25.0 °C,  $\text{CDCl}_3$ )  $\delta$  223.5 (C=O), 52.0 (CH), 40.9 (CH), 37.9 ( $\text{CH}_2$ ), 33.4 ( $\text{CH}_2$ ), 29.8 ( $\text{CH}_2$ ), 26.3 ( $\text{CH}_2$ ) and 26.1 ( $\text{CH}_2$ ); HRMS (ESI-TOF)  $m/z$ :  $[\text{M}+\text{H}]^+$  Calcd for  $\text{C}_8\text{H}_{13}\text{O}^+$  125.0961; Found 125.0961. Recorded data consistent with previous values.<sup>[5]</sup>

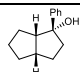

**(1R,3aS,6aS)-1-Hydroxy-1-phenyloctahydropentalene (24)**

In a flame-dried flask under argon, triazole **20c** (168 mg, 0.50 mmol, 1.0 equiv.) was dissolved in  $\text{C}_6\text{F}_6$  (25.0 mL).  $\text{Rh}_2(\text{S-NTTL})_4$  (72 mg, 0.05 mmol, 5 mol %) was added and the reaction heated to 50 °C (oil bath) for 1 h. The reaction was cooled to ambient temperature and basic alumina (2.5 g, pH 9.5, Brockmann activity III, *i.e.* 6 wt %  $\text{H}_2\text{O}$ ) was added and the mixture vigorously stirred for 30 min and filtered through a short pad of Celite, cooled to 0 °C and diluted with diethyl ether (12.5 mL).  $\text{PhMgBr}$  (3.0 M solution in diethyl ether, 0.5 mL, 1.5 mmol, 3.0 equiv.) was added dropwise and the reaction allowed to warm to rt overnight (ca. 16 h). The reaction was quenched by the addition of saturated aqueous ammonium chloride (30.0 mL) and the aqueous phase extracted with diethyl ether (3  $\times$  40 mL). The combined organics were washed with brine, dried  $\text{MgSO}_4$ , filtered and concentrated *in vacuo*. The residue was purified by flash column chromatography (silica, gel, 5–30% ethyl acetate in petrol) to afford the title compound (79.0 mg, 78%) as a colourless oil.  $\alpha_{\text{D}}^{22.6} +56.7$  (c 1.0,  $\text{CHCl}_3$ );  $\nu_{\text{max}}(\text{film})$  3458, 2943, 2862, 1445 and 1034  $\text{cm}^{-1}$ ;  $^1\text{H NMR}$  (400 MHz, 25.6 °C,  $\text{CDCl}_3$ )  $\delta$  7.52–7.47 (2 H, m, ArH), 7.37–7.32 (2 H, m, ArH), 7.25–7.21 (1 H, m, ArH), 2.76–2.58 (2 H, m, 2  $\times$  CH), 2.14–1.90 (3 H, m,  $\text{CH}_2$ ), 1.86–1.68 (3 H, m,  $\text{CH}_2$ ), 1.64–1.48 (3 H, m,  $\text{CH}_2$ ) and 1.47–1.38 (1 H, m,  $\text{CH}_2$ );  $^{13}\text{C}\{^1\text{H}\}$  NMR (101 MHz, 25.0 °C,  $\text{CDCl}_3$ )  $\delta$  147.7 (Ar), 128.2 (2  $\times$  ArH), 126.7 (ArH), 125.2 (2  $\times$  ArH), 83.1 (C–OH), 54.5 (CH), 44.6 (CH), 43.6 ( $\text{CH}_2$ ), 34.0 ( $\text{CH}_2$ ), 30.9 ( $\text{CH}_2$ ), 28.0 ( $\text{CH}_2$ ) and 26.5 ( $\text{CH}_2$ ); HRMS (ESI-TOF)  $m/z$ :  $[\text{M}+\text{Na}]^+$  Calcd for  $\text{C}_{14}\text{H}_{18}\text{NaO}^+$  225.1250; Found 225.1254.

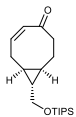

**(1R\*,8S\*,9r\*)-5-Oxo-bicyclo[6.1.0]non-3-en-9-ylmethoxytriisopropylsilane (25)**

In a flame-dried vial under argon, triazole **21** (0.40 mmol, 1.0 equiv.) was dissolved in PhMe (20.0 mL). Rh<sub>2</sub>(OAc)<sub>4</sub> (8.8 mg, 5 mol %) was added and the vial sealed with a Teflon cap. The reaction was heated to 120 °C (aluminium block) for 15 min after which time the reaction was cooled to ambient temperature. Basic alumina (4.20 g, pH 9.5, Brockmann activity III, *i.e.* 6 wt % H<sub>2</sub>O) was added and the mixture vigorously stirred for 15 min. Filtration through Celite and concentration *in vacuo* afforded a residue that was purified by flash column chromatography (silica gel, gradient from 5 to 30% ethyl acetate in petrol) to afford the title compound as a colourless oil.  $\nu_{\max}(\text{film})$  2941, 2864, 1686, 1462, 1105, 1083, 1065 and 1013 cm<sup>-1</sup>; <sup>1</sup>H NMR (400 MHz, 27.0 °C, CDCl<sub>3</sub>)  $\delta$  5.99 (1 H, ddd,  $J = 12.9, 7.1, 4.1$  Hz, =CH), 5.83 (1 H, dd,  $J = 12.9, 2.9$  Hz, =CH), 9.95–0.88 (1 H, m, cyclopropane CH), 3.64–3.48 (2 H, m, CH<sub>2</sub>OTIPS), 2.80–2.65 (2 H, m, CH<sub>2</sub>), 2.54 (1 H, ddd,  $J = 13.5, 11.4, 5.3$  Hz, CH<sub>2</sub>), 2.19–2.11 (1 H, m, CH<sub>2</sub>), 1.93 (1 H, dddd,  $J = 17.8, 10.6, 4.1, 3.0$  Hz, CH<sub>2</sub>), 1.63 (1 H, dddd,  $J = 14.4, 11.5, 10.2, 5.2$  Hz, CH<sub>2</sub>), 1.11–0.96 (21 H, m, 3 × *i*Pr) and 0.87–0.75 (2 H, m, cyclopropane CH); <sup>13</sup>C{<sup>1</sup>H} NMR (101 MHz, 27.0 °C, CDCl<sub>3</sub>)  $\delta$  209.2 (C=O), 135.5 (=CH), 130.3 (=CH), 65.7 (CH<sub>2</sub>OTIPS), 45.3 (CH<sub>2</sub>), 30.3 (CH<sub>2</sub>), 29.1 (cyclopropane CH), 22.6 (CH<sub>2</sub>), 20.9 (cyclopropane CH), 20.0 (cyclopropane CH), 17.9 (6 × *i*Pr) and 12.0 (3 × *i*Pr); HRMS (ESI-TOF)  $m/z$ : [M+Na]<sup>+</sup> Calcd for C<sub>19</sub>H<sub>34</sub>NaO<sub>2</sub>Si<sup>+</sup> 345.2220; Found 345.2221.

**21a** (128 mg) gave enone **25** (61 mg) in 63% yield.

**21b** (151 mg) gave enone **25** (53 mg) in 55% yield.

**21c** (160 mg) gave enone **25** (54 mg) in 56% yield.

**21d** (156 mg) gave enone **25** (54 mg) in 56% yield.

# Optimisation and ee Data

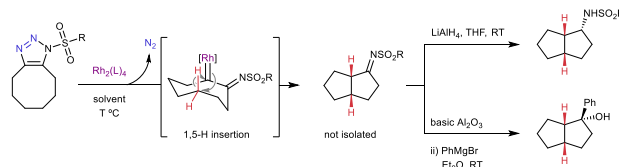

| Entry | R                                                               | Catalyst <sup>[a]</sup>                         | Solvent <sup>[b]</sup>                  | T <sup>[c]</sup> | Workup              | Yield <sup>[d]</sup> | ee <sup>[e]</sup>     |
|-------|-----------------------------------------------------------------|-------------------------------------------------|-----------------------------------------|------------------|---------------------|----------------------|-----------------------|
| 1     | <i>p</i> Tol                                                    | Rh <sub>2</sub> (OAc) <sub>4</sub>              | CH <sub>2</sub> Cl <sub>2</sub>         | 90               | LiAlH <sub>4</sub>  | 61%                  | 0%                    |
| 2     | <i>p</i> Tol                                                    | Rh <sub>2</sub> (S-DOSP) <sub>4</sub>           | CH <sub>2</sub> Cl <sub>2</sub>         | 90               | LiAlH <sub>4</sub>  | -                    | -8% <sup>[f]</sup>    |
| 3     | <i>p</i> Tol                                                    | Rh <sub>2</sub> (S-PTAD) <sub>4</sub>           | CH <sub>2</sub> Cl <sub>2</sub>         | 90               | LiAlH <sub>4</sub>  | -                    | -8% <sup>[f]</sup>    |
| 4     | <i>p</i> Tol                                                    | Rh <sub>2</sub> (S-NTTL) <sub>4</sub>           | CH <sub>2</sub> Cl <sub>2</sub>         | 90               | LiAlH <sub>4</sub>  | 29%                  | 18%                   |
| 5     | <i>p</i> Tol                                                    | Rh <sub>2</sub> (S-NTTL) <sub>4</sub>           | CH <sub>2</sub> Cl <sub>2</sub>         | 20               | LiAlH <sub>4</sub>  |                      | N.R. <sup>[g]</sup>   |
| 6     | <i>p</i> Tol                                                    | Rh <sub>2</sub> (S-NTTL) <sub>4</sub>           | PhMe                                    | 20               | LiAlH <sub>4</sub>  |                      | N.R. <sup>[g]</sup>   |
| 7     | <i>p</i> Tol                                                    | Rh <sub>2</sub> (S-NTTL) <sub>4</sub>           | PhMe                                    | 50               | LiAlH <sub>4</sub>  | 43%                  | 68%                   |
| 8     | <i>p</i> Tol                                                    | Rh <sub>2</sub> (S-NTTL) <sub>4</sub>           | PhMe <sup>[h]</sup>                     | 50               | LiAlH <sub>4</sub>  | -                    | 69%                   |
| 9     | <i>p</i> Tol                                                    | Rh <sub>2</sub> (S- <i>t</i> PTTL) <sub>4</sub> | PhMe                                    | 50               | LiAlH <sub>4</sub>  | -                    | 23%                   |
| 10    | <i>p</i> Tol                                                    | Rh <sub>2</sub> (S-NTTL) <sub>4</sub>           | CH <sub>2</sub> Cl <sub>2</sub>         | 50               | LiAlH <sub>4</sub>  | 36%                  | 29%                   |
| 11    | <i>p</i> Tol                                                    | Rh <sub>2</sub> (S-NTTL) <sub>4</sub>           | C <sub>6</sub> H <sub>6</sub>           | 50               | LiAlH <sub>4</sub>  | 72%                  | 56%                   |
| 12    | <i>p</i> Tol                                                    | Rh <sub>2</sub> (S-NTTL) <sub>4</sub>           | PhCl                                    | 50               | LiAlH <sub>4</sub>  | 43%                  | 31%                   |
| 13    | <i>p</i> Tol                                                    | Rh <sub>2</sub> (S-NTTL) <sub>4</sub>           | <i>t</i> BuOMe                          | 50               | LiAlH <sub>4</sub>  | -                    | 46%                   |
| 14    | <i>p</i> Tol                                                    | Rh <sub>2</sub> (S-NTTL) <sub>4</sub>           | cyclohexane                             | 50               | LiAlH <sub>4</sub>  | -                    | 71%                   |
| 15    | <i>p</i> Tol                                                    | Rh <sub>2</sub> (S-NTTL) <sub>4</sub>           | C <sub>6</sub> F <sub>6</sub>           | 50               | LiAlH <sub>4</sub>  | 72%                  | 93%                   |
| 16    | <i>p</i> Tol                                                    | Rh <sub>2</sub> (S-NTTL) <sub>4</sub>           | <i>n</i> C <sub>7</sub> F <sub>16</sub> | 50               | LiAlH <sub>4</sub>  |                      | insol. <sup>[i]</sup> |
| 17    | <i>p</i> NO <sub>2</sub> C <sub>6</sub> H <sub>4</sub>          | Rh <sub>2</sub> (OAc) <sub>4</sub>              | PhMe                                    | 50               | LiAlH <sub>4</sub>  | 8%                   | 0%                    |
| 18    | <i>p</i> NO <sub>2</sub> C <sub>6</sub> H <sub>4</sub>          | Rh <sub>2</sub> (S-NTTL) <sub>4</sub>           | PhMe                                    | 50               | LiAlH <sub>4</sub>  | -                    | 58%                   |
| 19    | <i>p</i> NO <sub>2</sub> C <sub>6</sub> H <sub>4</sub>          | Rh <sub>2</sub> (S- <i>t</i> PTTL) <sub>4</sub> | PhMe                                    | 50               | LiAlH <sub>4</sub>  | -                    | 47%                   |
| 20    | <i>p</i> MeOC <sub>6</sub> H <sub>4</sub>                       | Rh <sub>2</sub> (OAc) <sub>4</sub>              | PhMe                                    | 50               | LiAlH <sub>4</sub>  | 77%                  | 0%                    |
| 21    | <i>p</i> MeOC <sub>6</sub> H <sub>4</sub>                       | Rh <sub>2</sub> (S-NTTL) <sub>4</sub>           | PhMe                                    | 50               | LiAlH <sub>4</sub>  | 36%                  | 24%                   |
| 22    | <i>p</i> PhC <sub>6</sub> H <sub>4</sub>                        | Rh <sub>2</sub> (OAc) <sub>4</sub>              | PhMe                                    | 50               | LiAlH <sub>4</sub>  | 55%                  | 10%                   |
| 23    | <i>p</i> PhC <sub>6</sub> H <sub>4</sub>                        | Rh <sub>2</sub> (S-NTTL) <sub>4</sub>           | PhMe                                    | 50               | LiAlH <sub>4</sub>  | 53%                  | 35%                   |
| 24    | <i>p</i> Tol                                                    | Rh <sub>2</sub> (OAc) <sub>4</sub>              | CH <sub>2</sub> Cl <sub>2</sub>         | 90               | Hydrolysis/Grignard | -                    | 1%                    |
| 25    | Me                                                              | Rh <sub>2</sub> (S-NTTL) <sub>4</sub>           | PhMe                                    | 50               | Hydrolysis/Grignard | 80%                  | 32%                   |
| 26    | 2,4,6- <i>(i</i> Pr) <sub>3</sub> C <sub>6</sub> H <sub>2</sub> | Rh <sub>2</sub> (S-NTTL) <sub>4</sub>           | PhMe                                    | 50               | Hydrolysis/Grignard | 64%                  | 12%                   |
| 27    | Dansyl <sup>[j]</sup>                                           | Rh <sub>2</sub> (S-NTTL) <sub>4</sub>           | PhMe                                    | 50               | Hydrolysis/Grignard | 17%                  | 9%                    |
| 28    | <i>p</i> NO <sub>2</sub> C <sub>6</sub> H <sub>4</sub>          | Rh <sub>2</sub> (S-NTTL) <sub>4</sub>           | PhMe                                    | 50               | Hydrolysis/Grignard | 57%                  | 69%                   |
| 29    | <i>p</i> NO <sub>2</sub> C <sub>6</sub> H <sub>4</sub>          | Rh <sub>2</sub> (S-NTTL) <sub>4</sub>           | C <sub>6</sub> F <sub>6</sub>           | 50               | Hydrolysis/Grignard | 78%                  | 94%                   |

[a] 5 mol % catalyst employed; [b] 0.02 M concentration of 1-ST; [c] sealed vial in aluminium heating block; [d] isolated yield following column chromatography; where no yield is reported, ee was determined on crude reaction mixture; [e] determined by chiral solid phase HPLC; [f] opposite selectivity observed to Rh<sub>2</sub>(S-NTTL)<sub>4</sub>; [g] no consumption of starting material detected; [h] syringe pump addition of triazole to solution of catalyst; [i] total insolubility of reagents and catalyst; [j] Dansyl, R = 5-dimethylaminonaphthalen-1-yl. DOSP = *N*-(4-*n*-dodecylbenzenesulfonyl)prolinolate; PTAD = 2-adamantyl-2-(1,3-dioxoisindolin-2-yl)ethanoate; NTTL = 2-(1,3-dioxobenzo[*de*]isoquinolin-2-yl)-3,3-dimethyl-butanoate; *t*PTTL = 3,3-dimethyl-2-(5-*tert*-butyl-1,3-dioxoisindolin-2-yl)butanoate.

**Entry 1** R = *p*Tol, Rh<sub>2</sub>(OAc)<sub>4</sub>, 90 °C, CH<sub>2</sub>Cl<sub>2</sub>, LiAlH<sub>4</sub> workup  
AD-H, 7% *i*PrOH in hexane, 1 cm<sup>3</sup> min<sup>-1</sup>

| PDA Ch1 204nm 1nm |           |        |          |         |
|-------------------|-----------|--------|----------|---------|
| Peak#             | Ret. Time | Height | Area     | Area %  |
| 1                 | 16.47     | 328290 | 11409010 | 49.944  |
| 2                 | 23.04     | 235032 | 11434799 | 50.056  |
| Total             |           | 563322 | 22843810 | 100.000 |

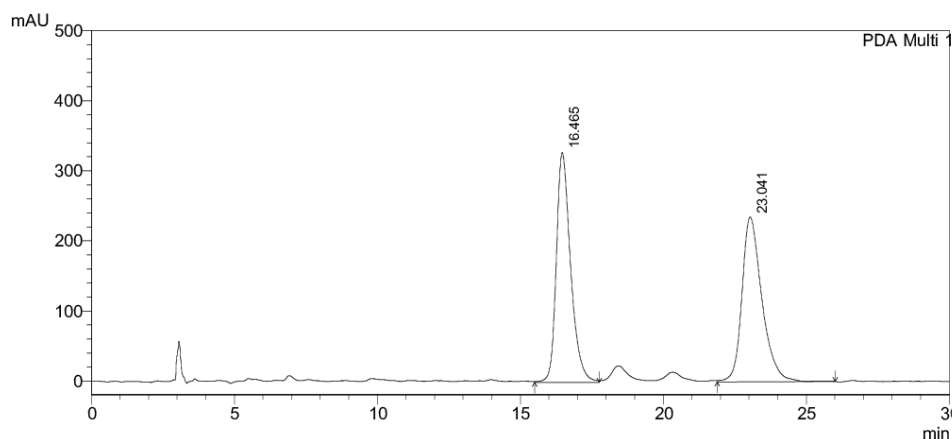

**Entry 2** R = *p*Tol, Rh<sub>2</sub>(S-DOSP)<sub>4</sub>, 90 °C, CH<sub>2</sub>Cl<sub>2</sub>, LiAlH<sub>4</sub> workup  
AD-H, 7% *i*PrOH in hexane, 1 cm<sup>3</sup> min<sup>-1</sup>

| PDA Ch1 204nm 4nm |           |         |          |         |
|-------------------|-----------|---------|----------|---------|
| Peak#             | Ret. Time | Height  | Area     | Area %  |
| 1                 | 16.69     | 788109  | 28417142 | 46.030  |
| 2                 | 23.16     | 666393  | 33318880 | 53.970  |
| Total             |           | 1454502 | 61736021 | 100.000 |

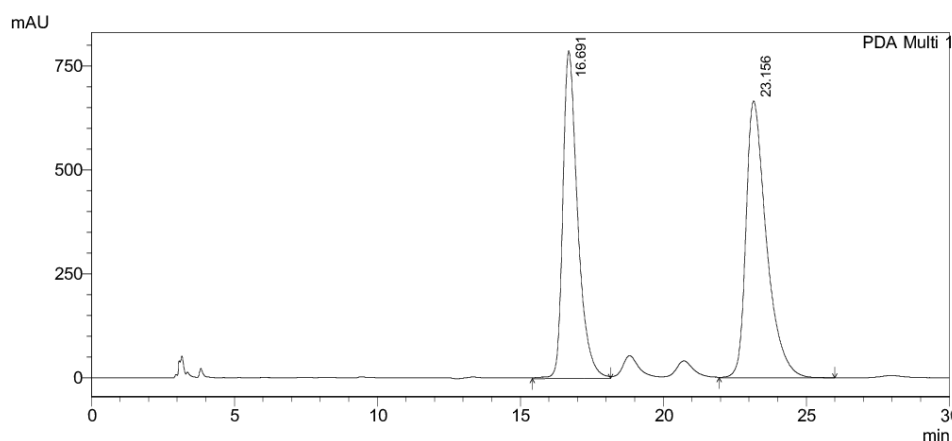

**Entry 3** R = *p*Tol, Rh<sub>2</sub>(S-PTAD)<sub>4</sub>, 90 °C, CH<sub>2</sub>Cl<sub>2</sub>, LiAlH<sub>4</sub> workup  
AD-H, 7% *i*PrOH in hexane, 1 cm<sup>3</sup> min<sup>-1</sup>

| PDA Ch1 204nm 4nm |           |        |          |         |
|-------------------|-----------|--------|----------|---------|
| Peak#             | Ret. Time | Height | Area     | Area %  |
| 1                 | 16.64     | 454609 | 16748482 | 46.089  |
| 2                 | 23.12     | 399983 | 19591168 | 53.911  |
| Total             |           | 854592 | 36339650 | 100.000 |

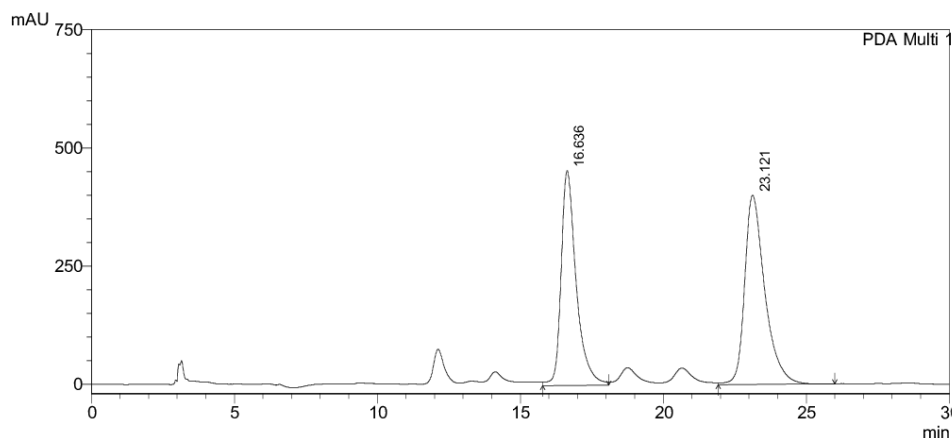

**Entry 4** R = *p*Tol, Rh<sub>2</sub>(S-NTTL)<sub>4</sub>, 90 °C, CH<sub>2</sub>Cl<sub>2</sub>, LiAlH<sub>4</sub> workup  
AD-H, 7% *i*PrOH in hexane, 1 cm<sup>3</sup> min<sup>-1</sup>

| PDA Ch1 204nm 1nm |           |         |          |         |
|-------------------|-----------|---------|----------|---------|
| Peak#             | Ret. Time | Height  | Area     | Area %  |
| 1                 | 16.07     | 1124451 | 38842213 | 58.805  |
| 2                 | 22.27     | 600179  | 27209965 | 41.195  |
| Total             |           | 1724630 | 66052177 | 100.000 |

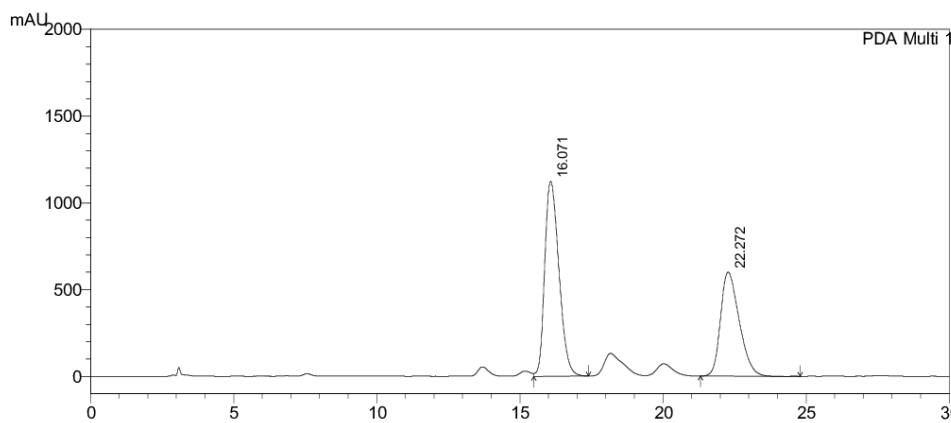

**Entry 7** R = *p*Tol, Rh<sub>2</sub>(S-NTTL)<sub>4</sub>, 50 °C, PhMe, LiAlH<sub>4</sub> workup  
AD-H, 7% *i*PrOH in hexane, 1 cm<sup>3</sup> min<sup>-1</sup>

| PDA Ch1 204nm 1nm |           |        |          |         |
|-------------------|-----------|--------|----------|---------|
| Peak#             | Ret. Time | Height | Area     | Area %  |
| 1                 | 15.92     | 740105 | 23811827 | 83.932  |
| 2                 | 22.13     | 105852 | 4558450  | 16.068  |
| Total             |           | 845956 | 28370277 | 100.000 |

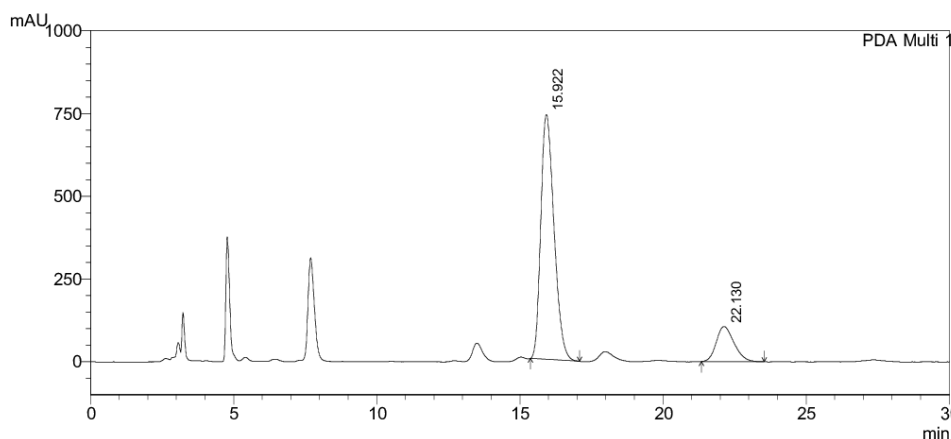

**Entry 8** R = *p*Tol, Rh<sub>2</sub>(S-NTTL)<sub>4</sub>, 50 °C, PhMe, syringe pump, LiAlH<sub>4</sub> workup  
AD-H, 7% *i*PrOH in hexane, 1 cm<sup>3</sup> min<sup>-1</sup>

| PDA Ch1 204nm 1nm |           |        |          |         |
|-------------------|-----------|--------|----------|---------|
| Peak#             | Ret. Time | Height | Area     | Area %  |
| 1                 | 15.92     | 620753 | 19883161 | 84.265  |
| 2                 | 22.13     | 87025  | 3712702  | 15.735  |
| Total             |           | 707778 | 23595863 | 100.000 |

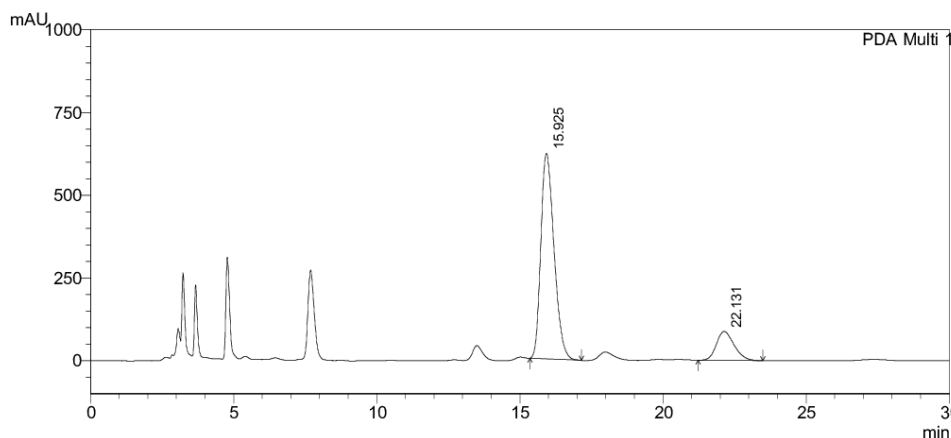



**Entry 9** R = *p*Tol, Rh<sub>2</sub>(S-*t*P TTL)<sub>4</sub>, 50 °C, PhMe, LiAlH<sub>4</sub> workup  
AD-H, 7% *i*PrOH in hexane, 1 cm<sup>3</sup> min<sup>-1</sup>

| Peak# | Ret. Time | Height  | Area      | Area %  |
|-------|-----------|---------|-----------|---------|
| 1     | 15.90     | 1792874 | 76941999  | 61.364  |
| 2     | 22.05     | 1022704 | 48443898  | 38.636  |
| Total |           | 2815578 | 125385897 | 100.000 |

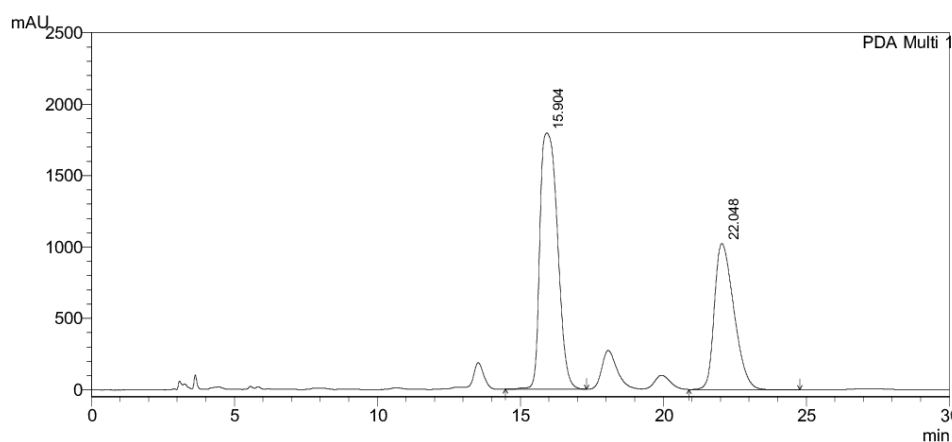

**Entry 10** R = *p*Tol, Rh<sub>2</sub>(S-NTTL)<sub>4</sub>, 50 °C, CH<sub>2</sub>Cl<sub>2</sub>, LiAlH<sub>4</sub> workup  
AD-H, 7% *i*PrOH in hexane, 1 cm<sup>3</sup> min<sup>-1</sup>

| Peak# | Ret. Time | Height  | Area     | Area %  |
|-------|-----------|---------|----------|---------|
| 1     | 16.92     | 801589  | 29700606 | 64.505  |
| 2     | 23.52     | 340451  | 16343243 | 35.495  |
| Total |           | 1142040 | 46043849 | 100.000 |

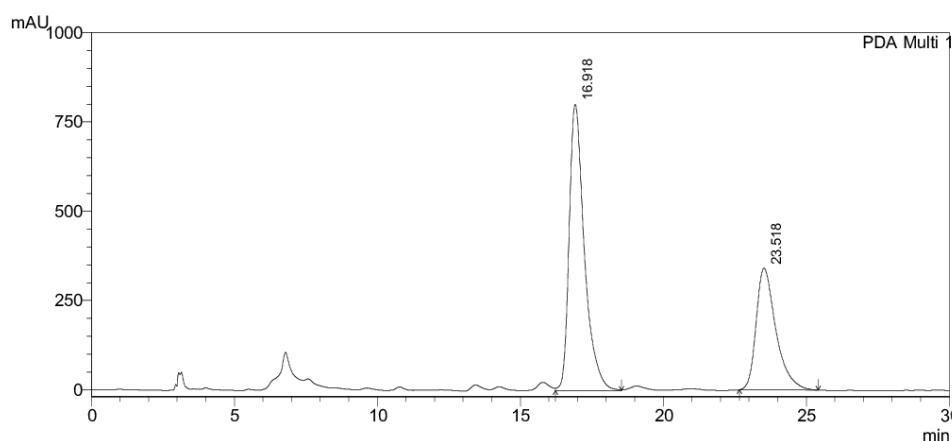

**Entry 11** R = *p*Tol, Rh<sub>2</sub>(S-NTTL)<sub>4</sub>, 50 °C, C<sub>6</sub>H<sub>6</sub>, LiAlH<sub>4</sub> workup  
AD-H, 7% *i*PrOH in hexane, 1 cm<sup>3</sup> min<sup>-1</sup>

| Peak# | Ret. Time | Height | Area    | Area %  |
|-------|-----------|--------|---------|---------|
| 1     | 15.99     | 62129  | 1922935 | 78.178  |
| 2     | 22.19     | 13757  | 536742  | 21.822  |
| Total |           | 75885  | 2459676 | 100.000 |

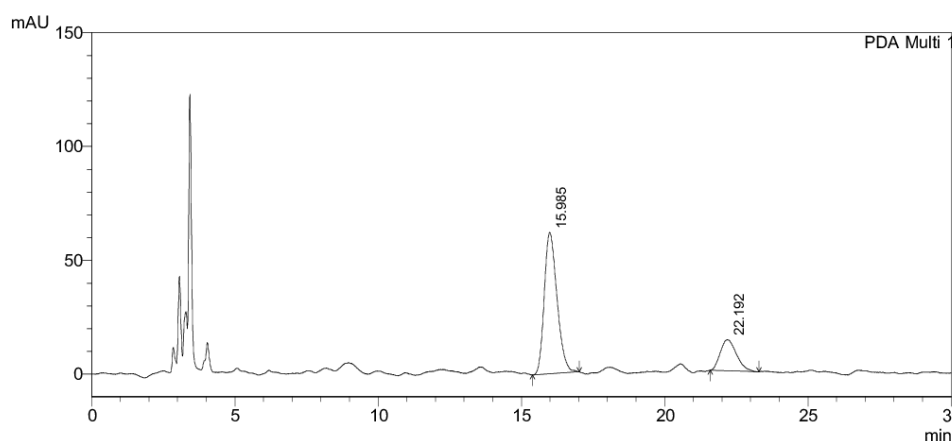

**Entry 12** R = *p*Tol, Rh<sub>2</sub>(S-NTTL)<sub>4</sub>, 50 °C, C<sub>6</sub>H<sub>6</sub>, LiAlH<sub>4</sub> workup  
AD-H, 7% *i*PrOH in hexane, 1 cm<sup>3</sup> min<sup>-1</sup>

| PDA Ch1 204nm 4nm |           |        |          |         |
|-------------------|-----------|--------|----------|---------|
| Peak#             | Ret. Time | Height | Area     | Area %  |
| 1                 | 16.47     | 424241 | 14600490 | 65.499  |
| 2                 | 22.94     | 165095 | 7690543  | 34.501  |
| Total             |           | 589336 | 22291033 | 100.000 |

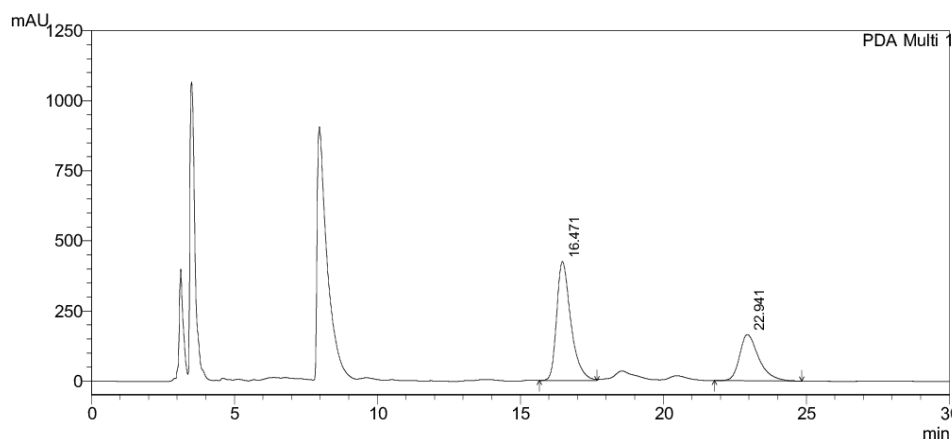

**Entry 13** R = *p*Tol, Rh<sub>2</sub>(S-NTTL)<sub>4</sub>, 50 °C, *t*BuOMe, LiAlH<sub>4</sub> workup  
AD-H, 7% *i*PrOH in hexane, 1 cm<sup>3</sup> min<sup>-1</sup>

| PDA Ch1 204nm 4nm |           |         |          |         |
|-------------------|-----------|---------|----------|---------|
| Peak#             | Ret. Time | Height  | Area     | Area %  |
| 1                 | 16.64     | 786182  | 27837788 | 73.225  |
| 2                 | 23.17     | 214192  | 10178796 | 26.775  |
| Total             |           | 1000374 | 38016583 | 100.000 |

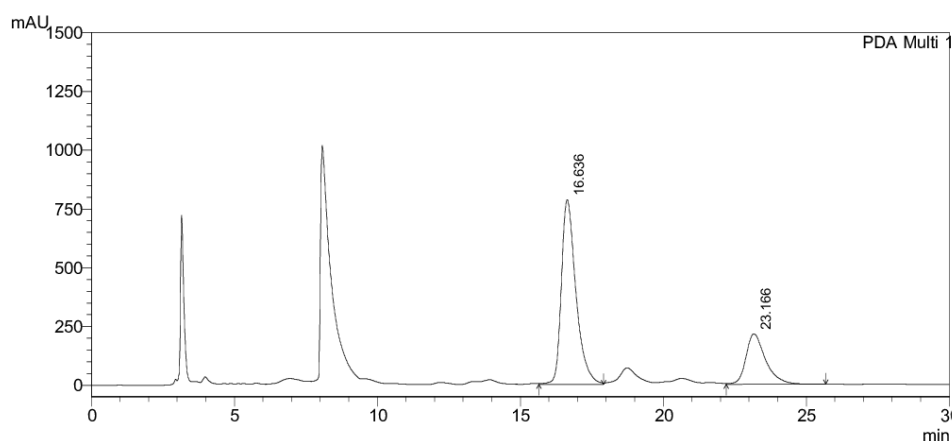

**Entry 14** R = *p*Tol, Rh<sub>2</sub>(S-NTTL)<sub>4</sub>, 50 °C, *cy*Hex, LiAlH<sub>4</sub> workup  
AD-H, 7% *i*PrOH in hexane, 1 cm<sup>3</sup> min<sup>-1</sup>

| PDA Ch1 204nm 4nm |           |        |         |         |
|-------------------|-----------|--------|---------|---------|
| Peak#             | Ret. Time | Height | Area    | Area %  |
| 1                 | 16.49     | 239196 | 7946477 | 85.527  |
| 2                 | 22.97     | 30976  | 1344678 | 14.473  |
| Total             |           | 270171 | 9291155 | 100.000 |

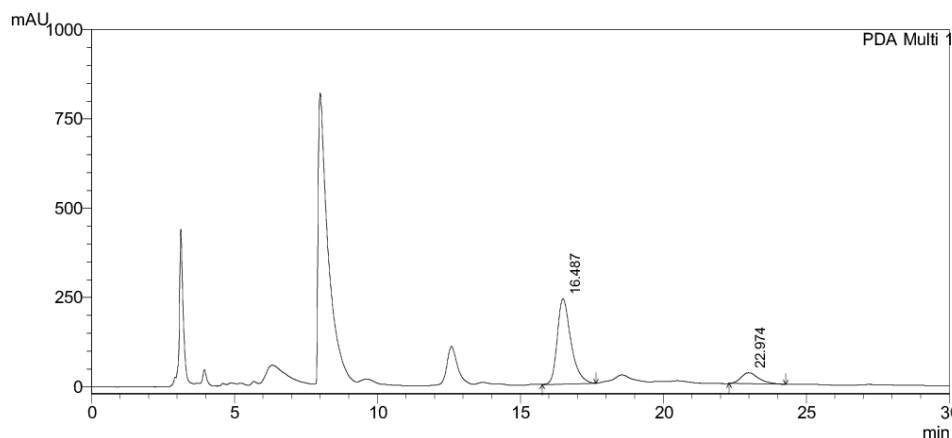

**Entry 15** R = *p*Tol, Rh<sub>2</sub>(S-NTTL)<sub>4</sub>, 50 °C, C<sub>6</sub>F<sub>6</sub>, LiAlH<sub>4</sub> workup  
AD-H, 7% *i*PrOH in hexane, 1 cm<sup>3</sup> min<sup>-1</sup>

PDA Ch1 204nm 1nm

| Peak# | Ret. Time | Height | Area     | Area %  |
|-------|-----------|--------|----------|---------|
| 1     | 16.02     | 436885 | 13975150 | 95.689  |
| 2     | 22.23     | 15206  | 629616   | 4.311   |
| Total |           | 452091 | 14604766 | 100.000 |

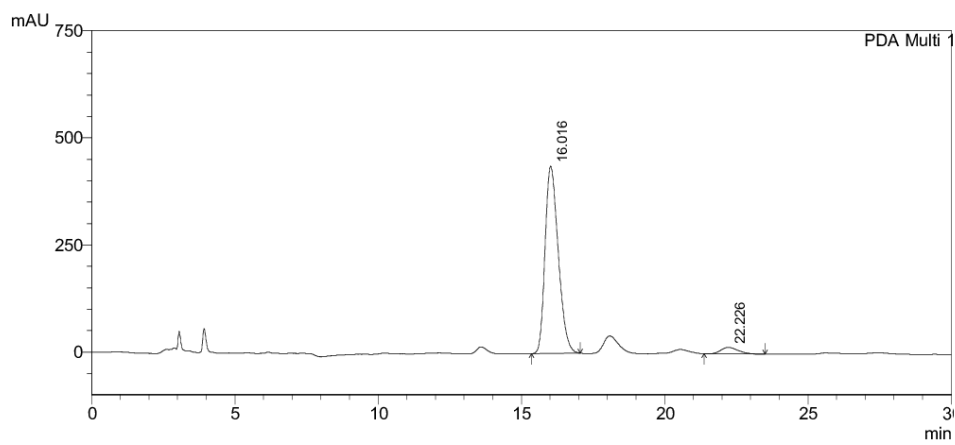

**Entry 17** R =  $p\text{NO}_2\text{C}_6\text{H}_4$ ,  $\text{Rh}_2(\text{OAc})_4$ , 50 °C, PhMe,  $\text{LiAlH}_4$  workup  
AD-H, 15% *i*PrOH in hexane, 1  $\text{cm}^3 \text{min}^{-1}$

| PDA Ch1 204nm 1nm |           |         |          |         |
|-------------------|-----------|---------|----------|---------|
| Peak#             | Ret. Time | Height  | Area     | Area %  |
| 1                 | 14.94     | 755750  | 25843143 | 49.950  |
| 2                 | 27.02     | 433979  | 25894635 | 50.050  |
| Total             |           | 1189729 | 51737778 | 100.000 |

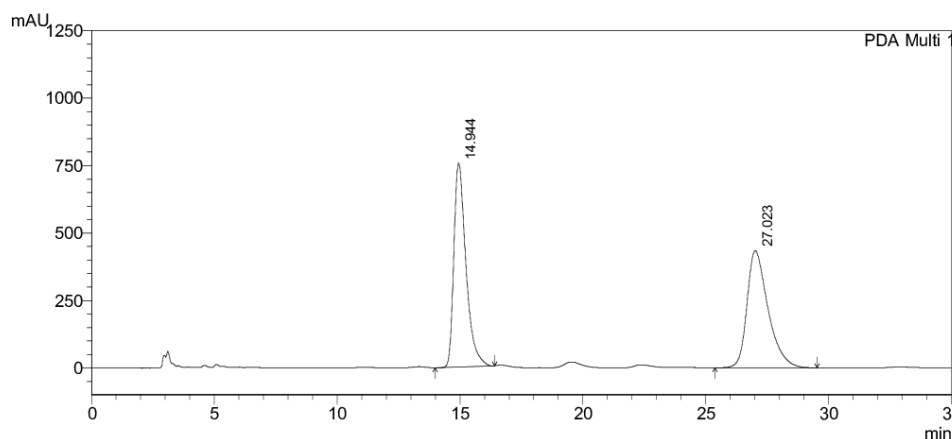

**Entry 18** R =  $p\text{NO}_2\text{C}_6\text{H}_4$ ,  $\text{Rh}_2(\text{S-NTTL})_4$ , 50 °C, PhMe,  $\text{LiAlH}_4$  workup  
AD-H, 15% *i*PrOH in hexane, 1  $\text{cm}^3 \text{min}^{-1}$

| PDA Ch1 268nm 4nm |           |         |          |         |
|-------------------|-----------|---------|----------|---------|
| Peak#             | Ret. Time | Height  | Area     | Area %  |
| 1                 | 14.96     | 1436823 | 48007626 | 78.907  |
| 2                 | 27.12     | 213350  | 12832865 | 21.093  |
| Total             |           | 1650173 | 60840490 | 100.000 |

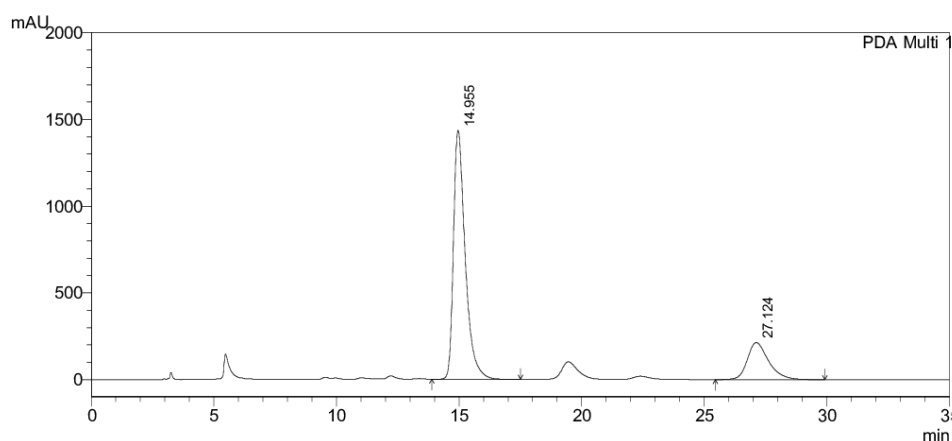

**Entry 19** R =  $p\text{NO}_2\text{C}_6\text{H}_4$ ,  $\text{Rh}_2(\text{S-}t\text{P TTL})_4$ , 50 °C, PhMe,  $\text{LiAlH}_4$  workup  
AD-H, 15% *i*PrOH in hexane, 1  $\text{cm}^3 \text{min}^{-1}$

| PDA Ch1 268nm 4nm |           |        |         |         |
|-------------------|-----------|--------|---------|---------|
| Peak#             | Ret. Time | Height | Area    | Area %  |
| 1                 | 14.99     | 203636 | 6271089 | 73.431  |
| 2                 | 27.17     | 40759  | 2269075 | 26.569  |
| Total             |           | 244395 | 8540164 | 100.000 |

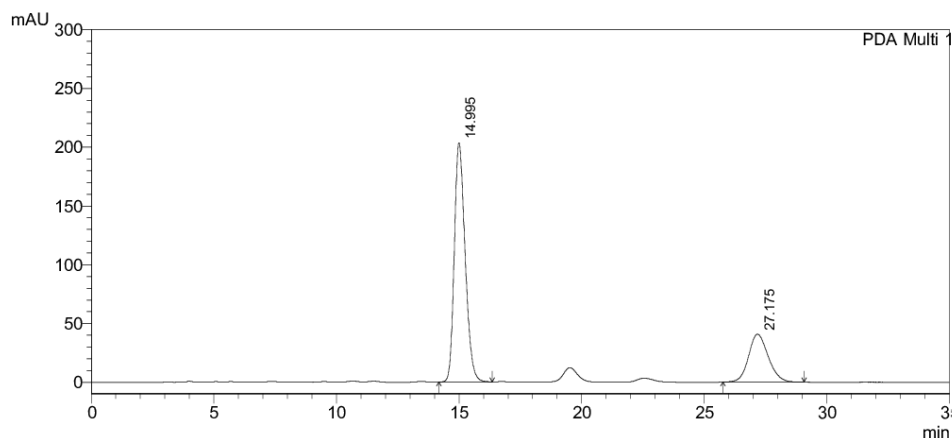

**Entry 20** R = *p*MeOC<sub>6</sub>H<sub>4</sub>, Rh<sub>2</sub>(OAc)<sub>4</sub>, 50 °C, PhMe, LiAlH<sub>4</sub> workup  
 AD-H, 15% *i*PrOH in hexane, 1 cm<sup>3</sup> min<sup>-1</sup>

| PDA Ch1 238nm 4nm |           |         |          |         |
|-------------------|-----------|---------|----------|---------|
| Peak#             | Ret. Time | Height  | Area     | Area %  |
| 1                 | 12.47     | 585829  | 15659518 | 49.962  |
| 2                 | 17.77     | 415360  | 15683564 | 50.038  |
| Total             |           | 1001190 | 31343082 | 100.000 |

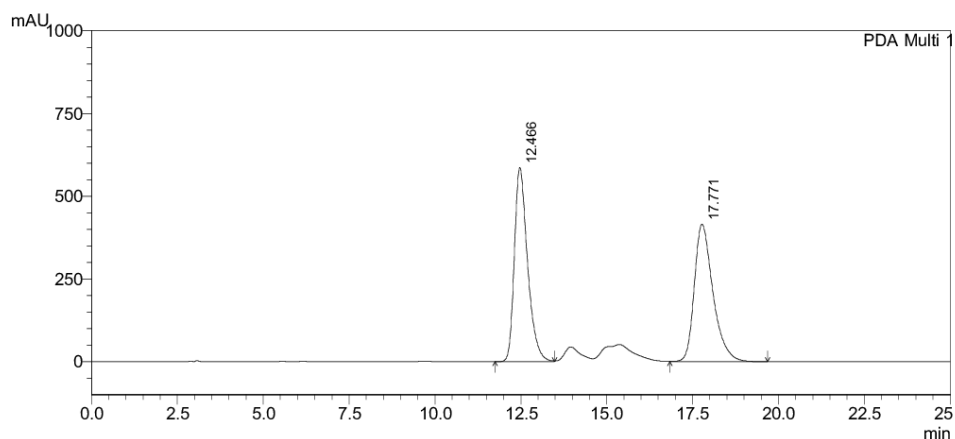

**Entry 21** R = *p*MeOC<sub>6</sub>H<sub>4</sub>, Rh<sub>2</sub>(*S*-NTTL)<sub>4</sub>, 50 °C, PhMe, LiAlH<sub>4</sub> workup  
 AD-H, 15% *i*PrOH in hexane, 1 cm<sup>3</sup> min<sup>-1</sup>

| PDA Ch1 238nm 4nm |           |         |           |         |
|-------------------|-----------|---------|-----------|---------|
| Peak#             | Ret. Time | Height  | Area      | Area %  |
| 1                 | 12.51     | 2027105 | 76618292  | 62.133  |
| 2                 | 17.78     | 1188906 | 46694981  | 37.867  |
| Total             |           | 3216011 | 123313273 | 100.000 |

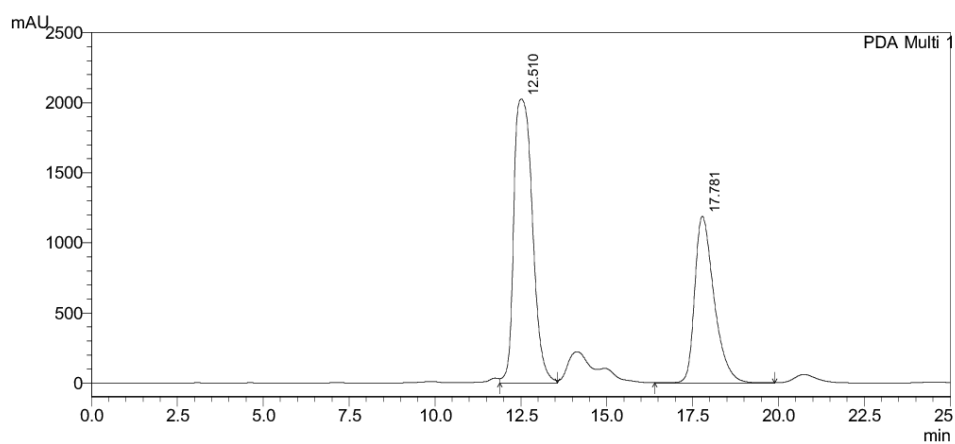

**Entry 22** R = *p*PhC<sub>6</sub>H<sub>4</sub>, Rh<sub>2</sub>(OAc)<sub>4</sub>, 50 °C, PhMe, LiAlH<sub>4</sub> workup  
AD-H, 15% *i*PrOH in hexane, 1 cm<sup>3</sup> min<sup>-1</sup>

PDA Ch1 209nm 4nm

| Peak# | Ret. Time | Height | Area     | Area %  |
|-------|-----------|--------|----------|---------|
| 1     | 12.16     | 303388 | 7462161  | 45.244  |
| 2     | 15.57     | 270643 | 9030949  | 54.756  |
| Total |           | 574031 | 16493110 | 100.000 |

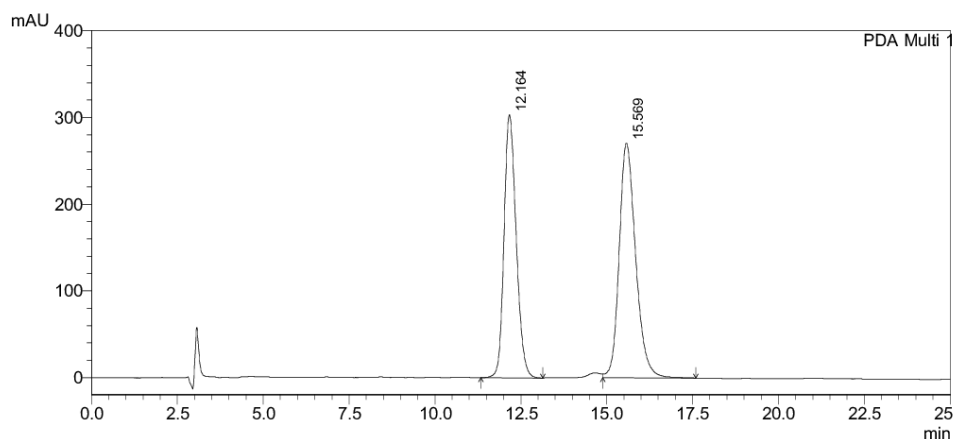

**Entry 23** R = *p*PhC<sub>6</sub>H<sub>4</sub>, Rh<sub>2</sub>(S-NTTL)<sub>4</sub>, 50 °C, PhMe, LiAlH<sub>4</sub> workup  
AD-H, 15% *i*PrOH in hexane, 1 cm<sup>3</sup> min<sup>-1</sup>

PDA Ch1 209nm 4nm

| Peak# | Ret. Time | Height | Area     | Area %  |
|-------|-----------|--------|----------|---------|
| 1     | 12.19     | 454658 | 13176524 | 67.655  |
| 2     | 15.67     | 188482 | 6299615  | 32.345  |
| Total |           | 643140 | 19476139 | 100.000 |

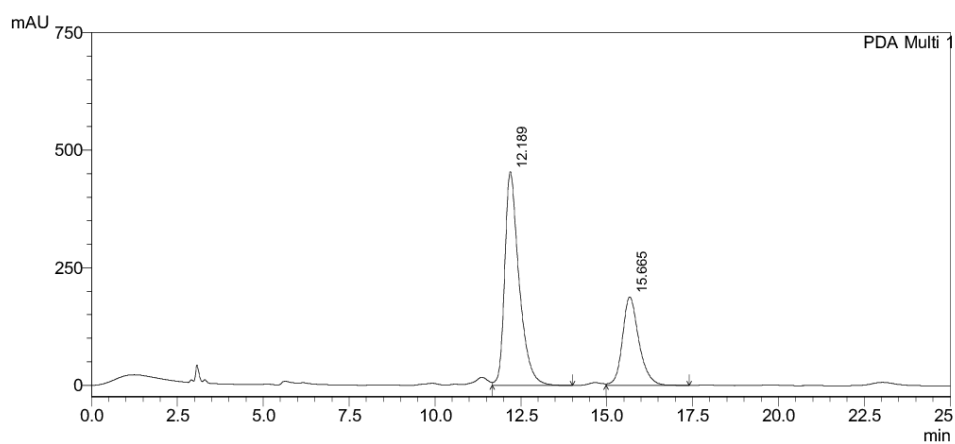

**Entry 24** R = *p*Tol, Rh<sub>2</sub>(OAc)<sub>4</sub>, 90 °C, CH<sub>2</sub>Cl<sub>2</sub>, hydrolysis/Grignard workup  
AD-H, 0.25% *i*PrOH in hexane, 1 cm<sup>3</sup> min<sup>-1</sup>

| PDA Ch1 204nm 4nm |           |        |         |         |
|-------------------|-----------|--------|---------|---------|
| Peak#             | Ret. Time | Height | Area    | Area %  |
| 1                 | 37.27     | 52211  | 3989917 | 50.305  |
| 2                 | 43.85     | 40812  | 3941578 | 49.695  |
| Total             |           | 93022  | 7931495 | 100.000 |

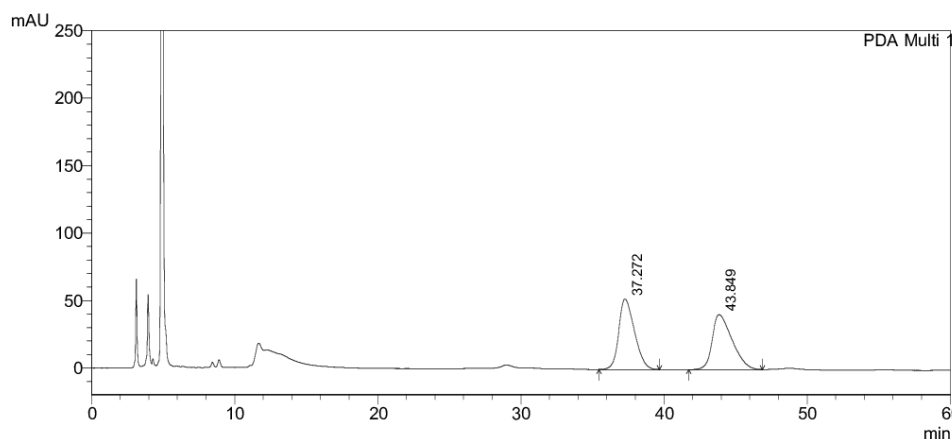

**Entry 25** R = Me, Rh<sub>2</sub>(S-NTTL)<sub>4</sub>, 50 °C, PhMe, hydrolysis/Grignard workup  
AD-H, 0.25% *i*PrOH in hexane, 1 cm<sup>3</sup> min<sup>-1</sup>

| PDA Ch1 204nm 4nm |           |        |         |         |
|-------------------|-----------|--------|---------|---------|
| Peak#             | Ret. Time | Height | Area    | Area %  |
| 1                 | 35.66     | 81513  | 6546925 | 65.913  |
| 2                 | 43.04     | 33231  | 3385724 | 34.087  |
| Total             |           | 114744 | 9932648 | 100.000 |

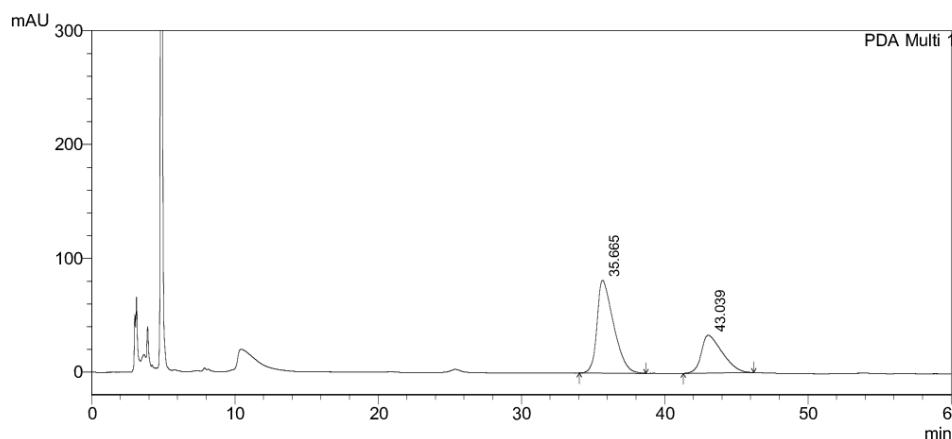

**Entry 26** R = 2,4,6-(*i*Pr)<sub>3</sub>C<sub>6</sub>H<sub>2</sub>, Rh<sub>2</sub>(S-NTTL)<sub>4</sub>, 50 °C, PhMe, hydrolysis/Grignard workup  
AD-H, 0.25% *i*PrOH in hexane, 1 cm<sup>3</sup> min<sup>-1</sup>

| PDA Ch1 204nm 4nm |           |        |          |         |
|-------------------|-----------|--------|----------|---------|
| Peak#             | Ret. Time | Height | Area     | Area %  |
| 1                 | 37.28     | 59780  | 4656926  | 44.181  |
| 2                 | 43.88     | 58876  | 5883700  | 55.819  |
| Total             |           | 118656 | 10540626 | 100.000 |

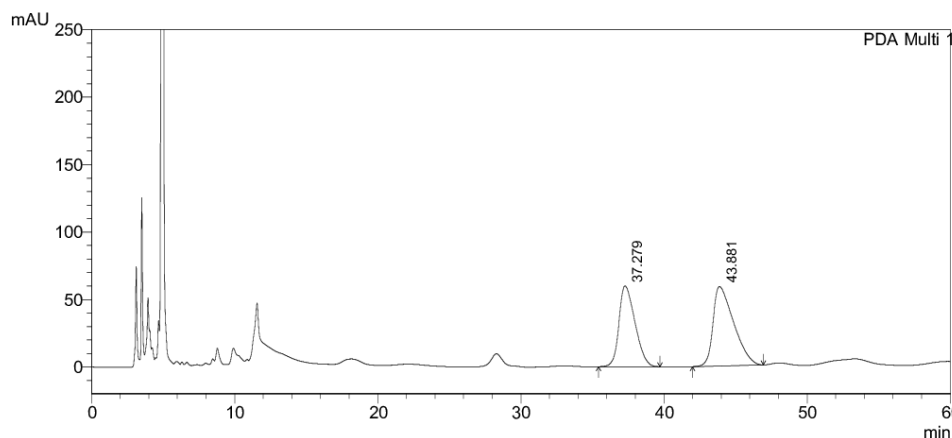

**Entry 27** R = 5-dimethylaminonaphthalen-1-yl,  $\text{Rh}_2(\text{S-NTTL})_4$ , 50 °C, PhMe, hydrolysis/Grignard workup  
AD-H, 0.25% *i*PrOH in hexane, 1 cm<sup>3</sup> min<sup>-1</sup>

| PDA Ch1 204nm 4nm |           |        |          |         |
|-------------------|-----------|--------|----------|---------|
| Peak#             | Ret. Time | Height | Area     | Area %  |
| 1                 | 35.61     | 100471 | 8131938  | 54.496  |
| 2                 | 42.73     | 56826  | 6790281  | 45.504  |
| Total             |           | 157297 | 14922219 | 100.000 |

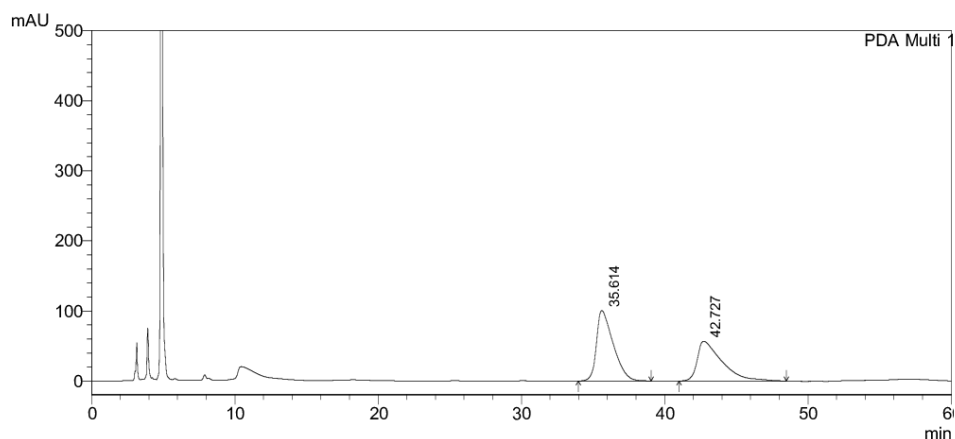

**Entry 28** R = *p*NO<sub>2</sub>C<sub>6</sub>H<sub>4</sub>,  $\text{Rh}_2(\text{S-NTTL})_4$ , 50 °C, PhMe, hydrolysis/Grignard workup  
AD-H, 0.25% *i*PrOH in hexane, 1 cm<sup>3</sup> min<sup>-1</sup>

| PDA Ch1 204nm 4nm |           |        |          |         |
|-------------------|-----------|--------|----------|---------|
| Peak#             | Ret. Time | Height | Area     | Area %  |
| 1                 | 36.27     | 220744 | 17845494 | 84.621  |
| 2                 | 42.70     | 34549  | 3243124  | 15.379  |
| Total             |           | 255293 | 21088617 | 100.000 |

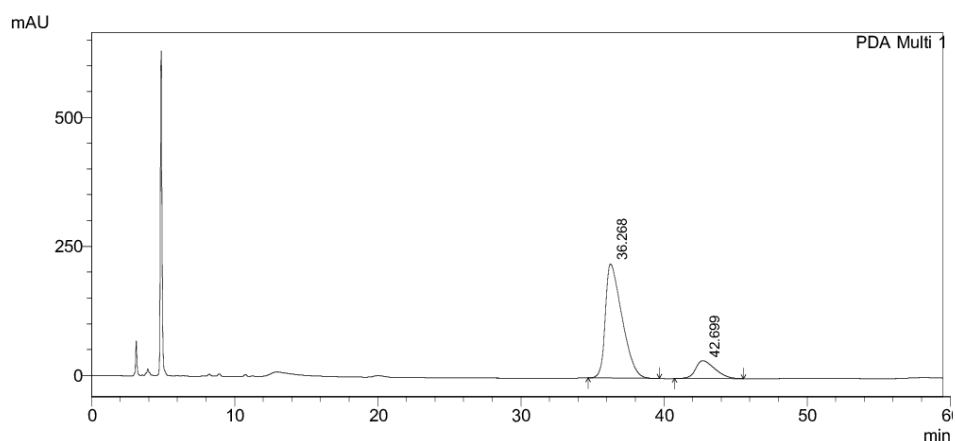

**Entry 29** R = *p*NO<sub>2</sub>C<sub>6</sub>H<sub>4</sub>,  $\text{Rh}_2(\text{S-NTTL})_4$ , 50 °C, C<sub>6</sub>F<sub>6</sub>, hydrolysis/Grignard workup  
AD-H, 0.25% *i*PrOH in hexane, 1 cm<sup>3</sup> min<sup>-1</sup>

| PDA Ch1 204nm 4nm |           |        |          |         |
|-------------------|-----------|--------|----------|---------|
| Peak#             | Ret. Time | Height | Area     | Area %  |
| 1                 | 33.64     | 667819 | 79116805 | 97.010  |
| 2                 | 43.08     | 23833  | 2438555  | 2.990   |
| Total             |           | 691652 | 81555360 | 100.000 |

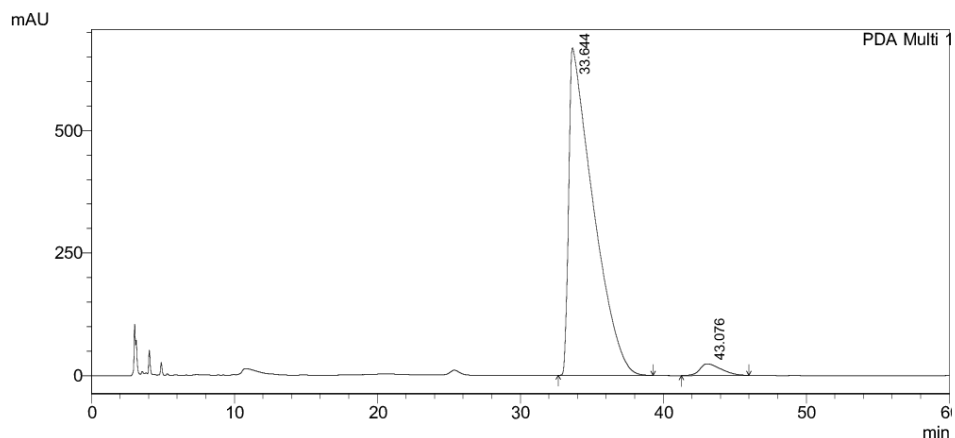



# NMR Spectra

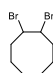

S1

$^1\text{H}$ ,  $\text{CDCl}_3$ , 500 MHz

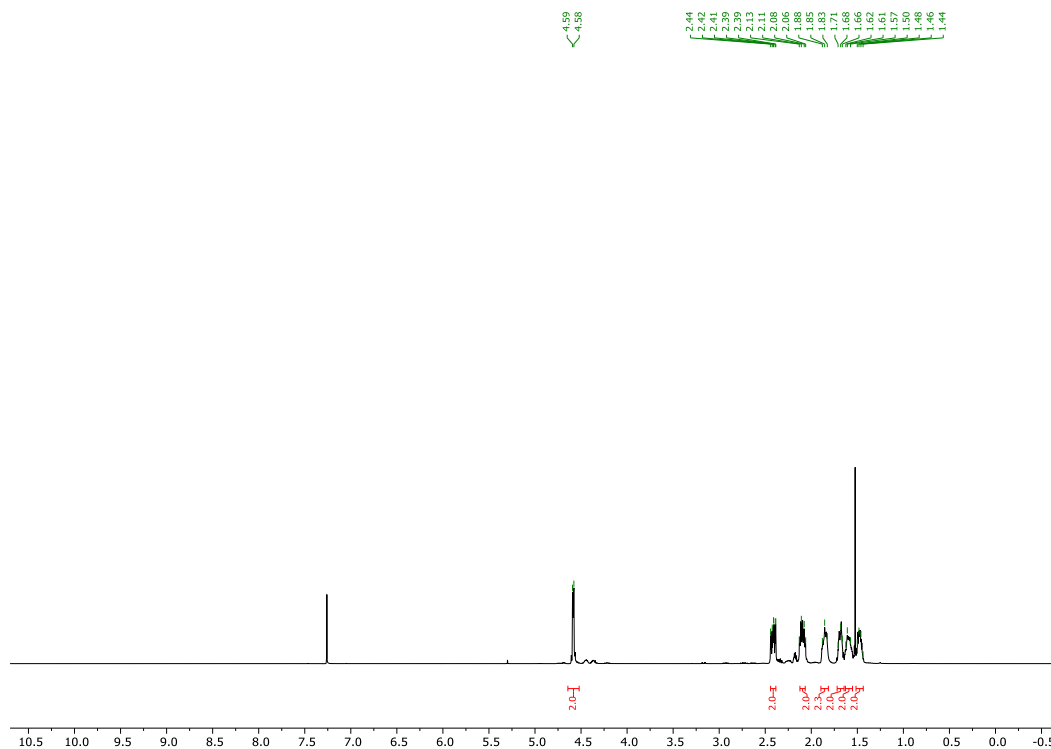

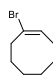

S2

$^1\text{H}$ ,  $\text{CDCl}_3$ , 500 MHz

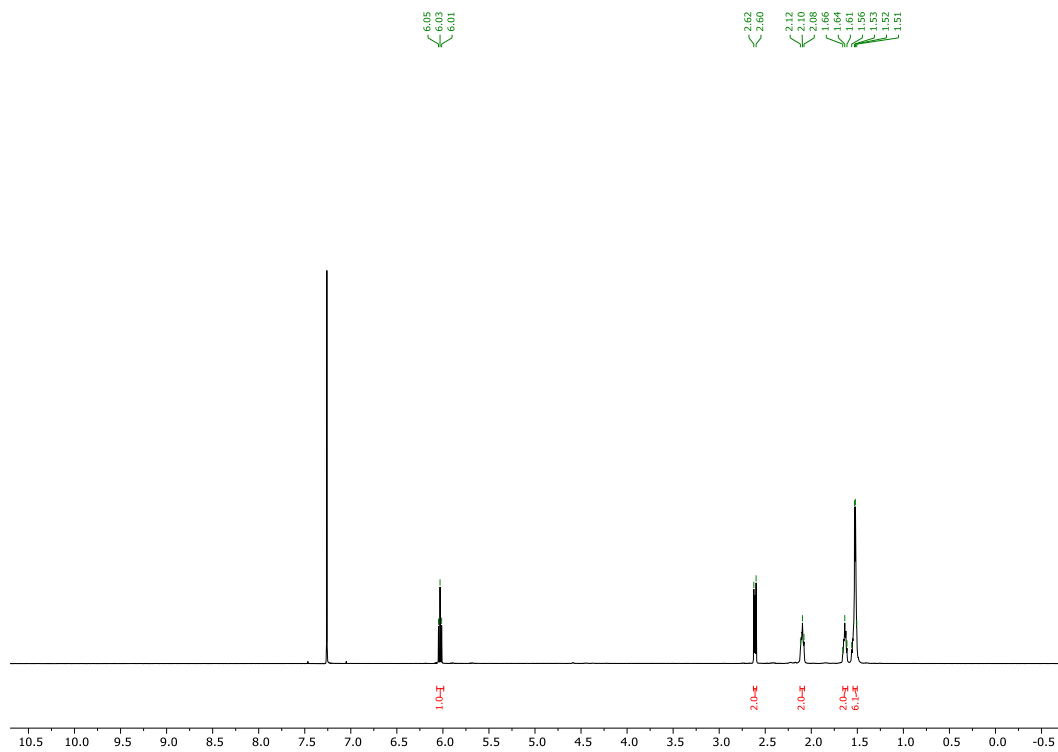

$^{13}\text{C}\{^1\text{H}\}$ ,  $\text{CDCl}_3$ , 126 MHz

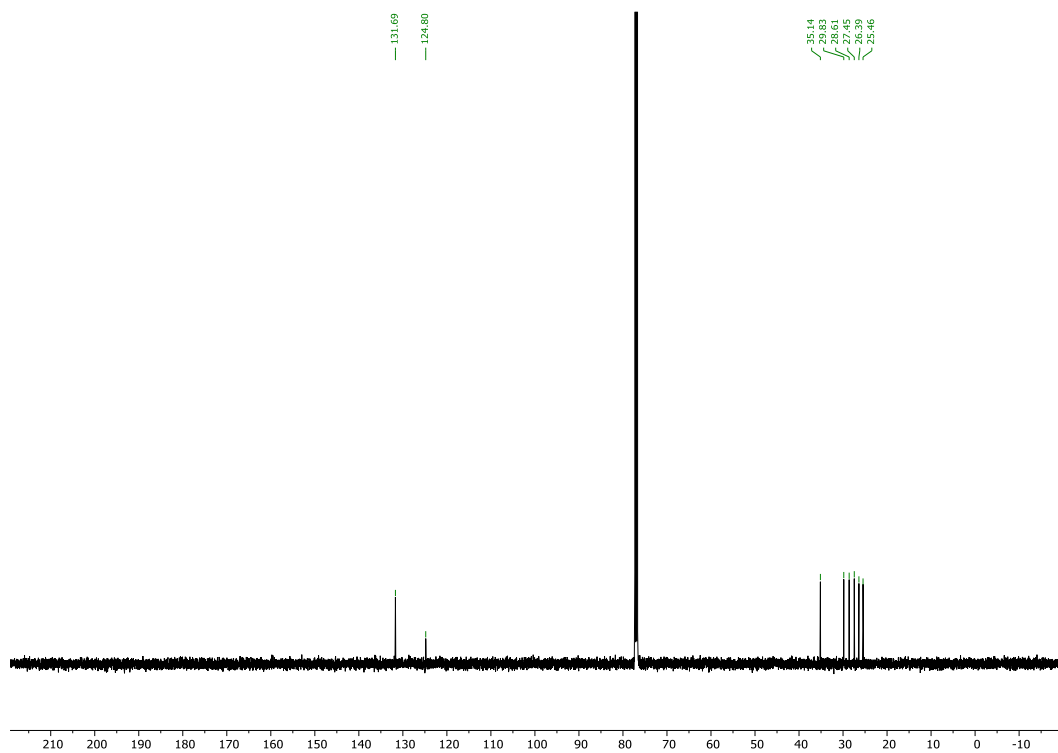

S26

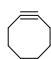

18

$^1\text{H}$ ,  $\text{CDCl}_3$ , 500 MHz

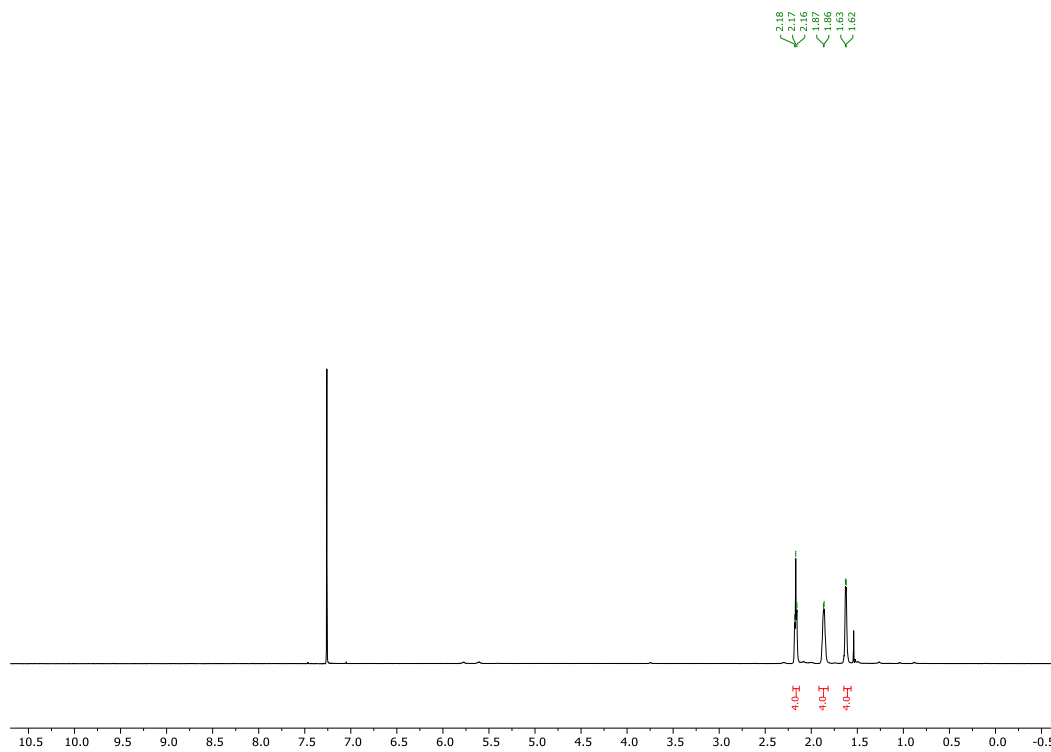

$^{13}\text{C}\{^1\text{H}\}$ ,  $\text{CDCl}_3$ , 126 MHz

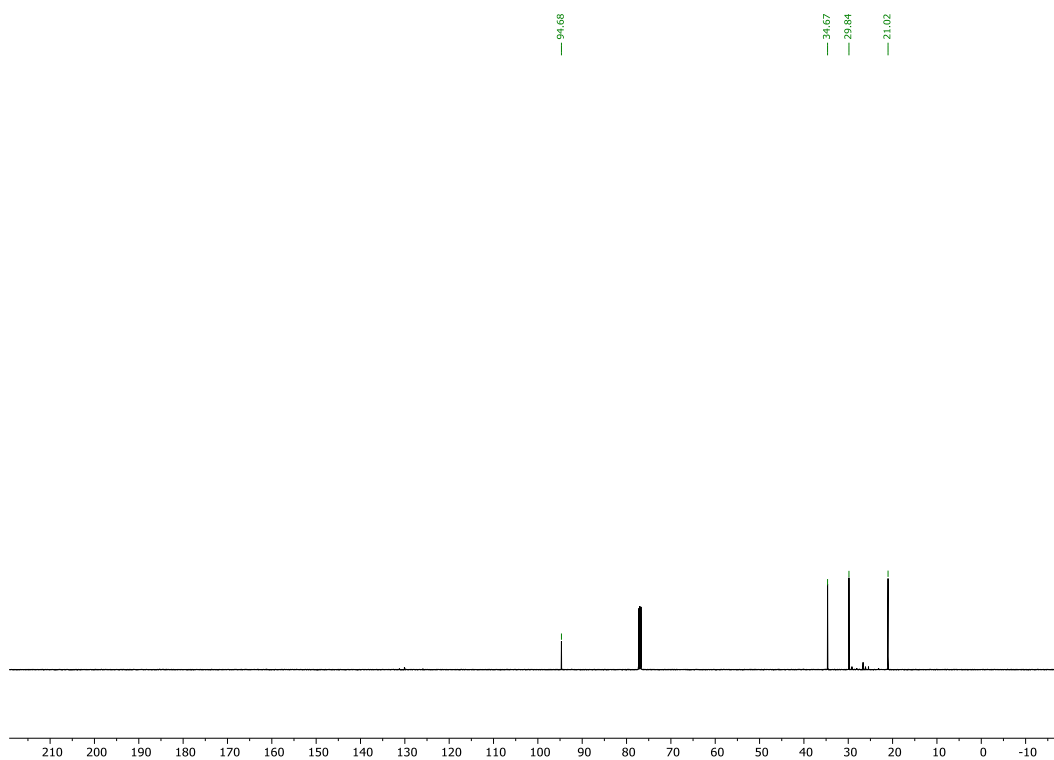

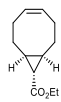

S3

$^1\text{H}$ ,  $\text{CDCl}_3$ , 400 MHz

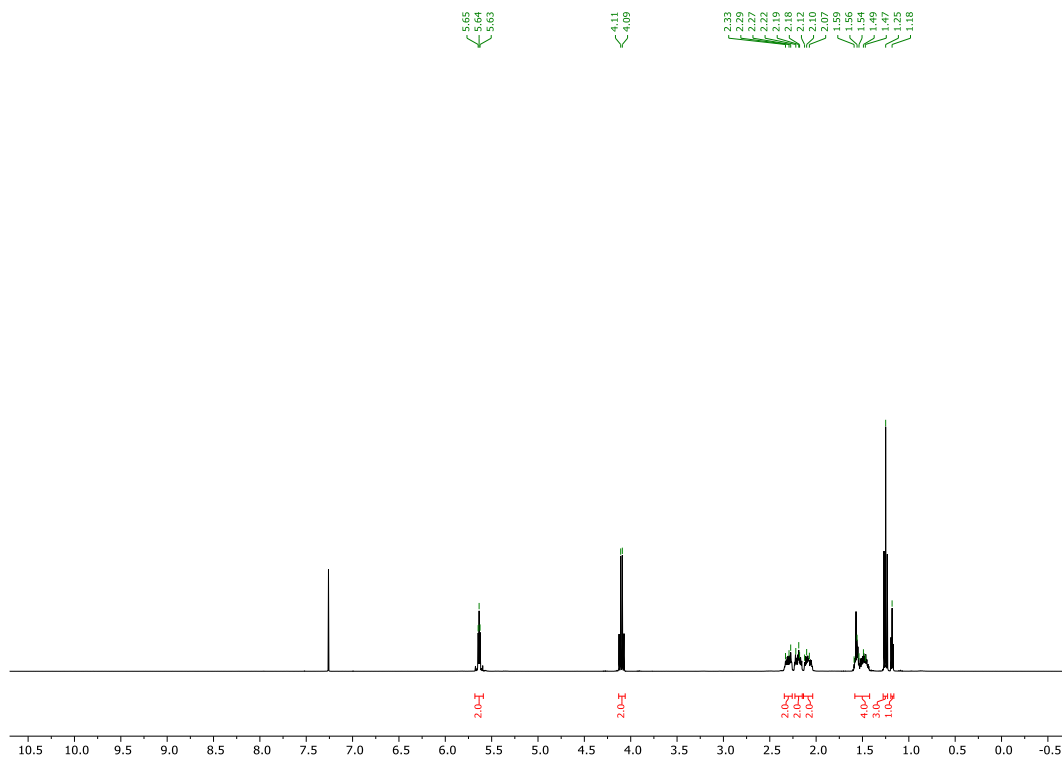

$^{13}\text{C}\{^1\text{H}\}$ ,  $\text{CDCl}_3$ , 101 MHz

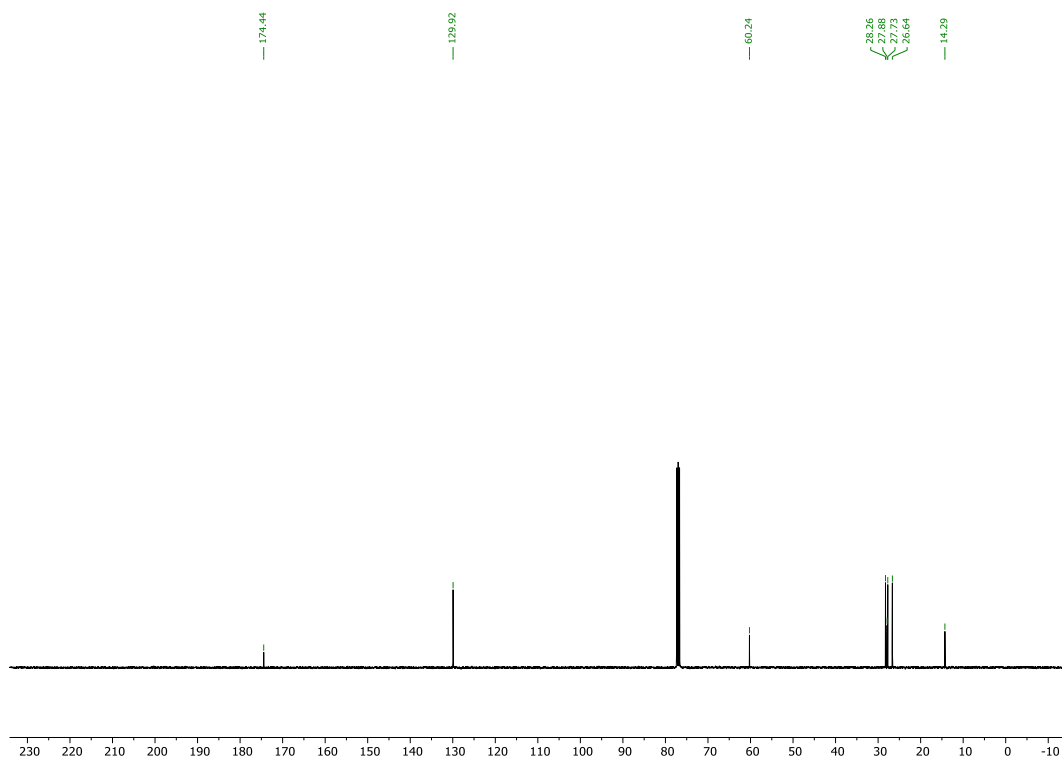

S28

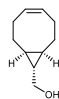

S4

$^1\text{H}$ ,  $\text{CDCl}_3$ , 400 MHz

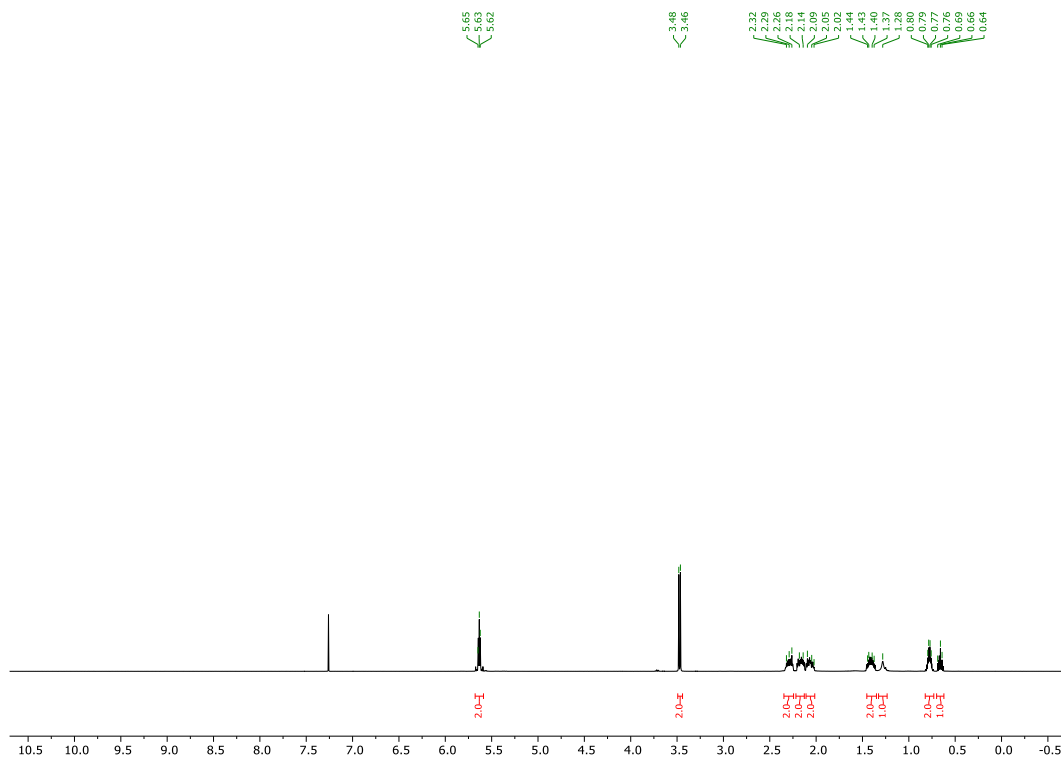

$^{13}\text{C}\{^1\text{H}\}$ ,  $\text{CDCl}_3$ , 101 MHz

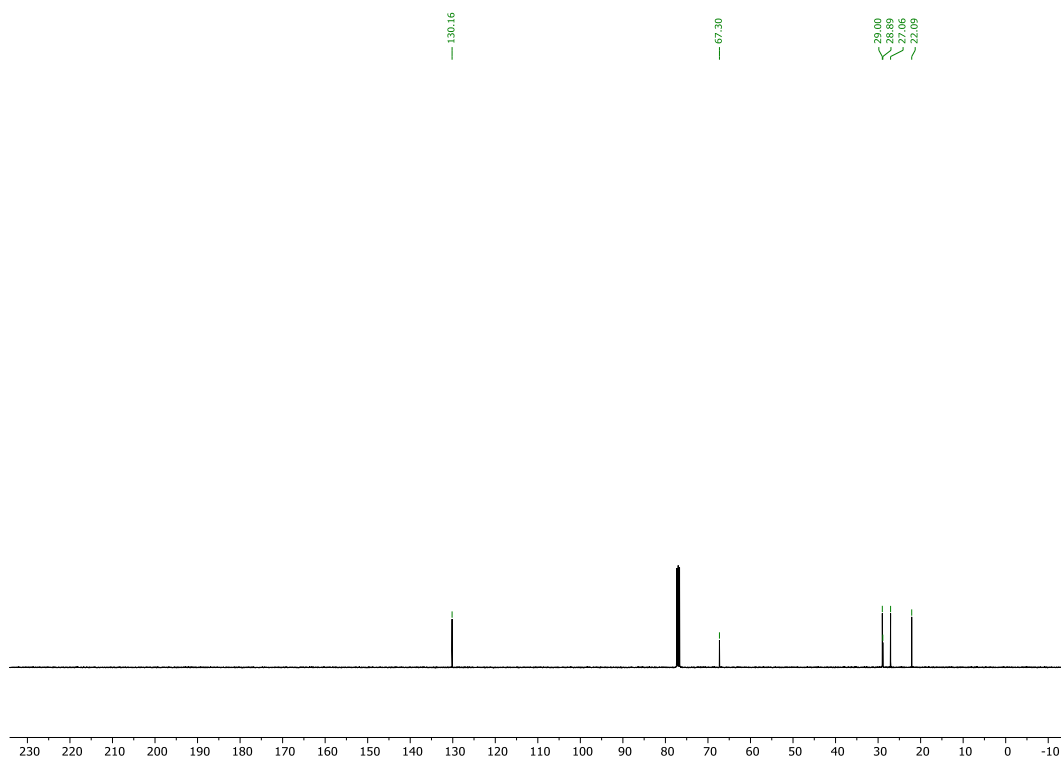

S29

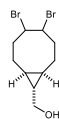

S5

$^1\text{H}$ ,  $\text{CDCl}_3$ , 400 MHz

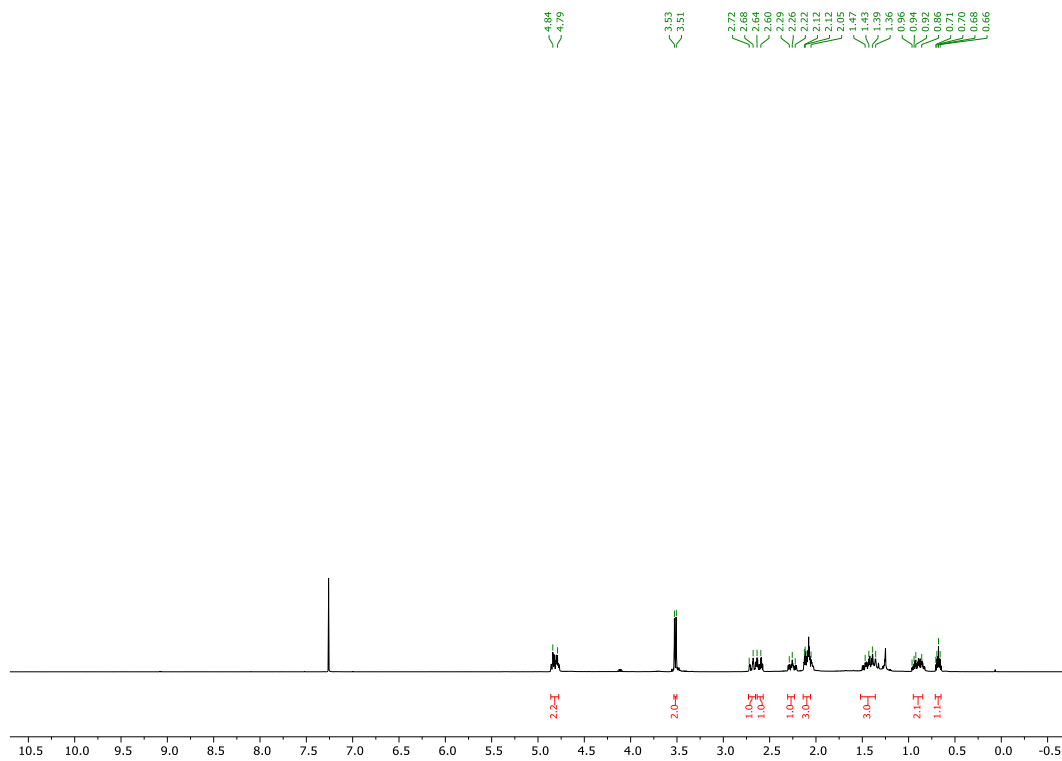

$^{13}\text{C}\{^1\text{H}\}$ ,  $\text{CDCl}_3$ , 101 MHz

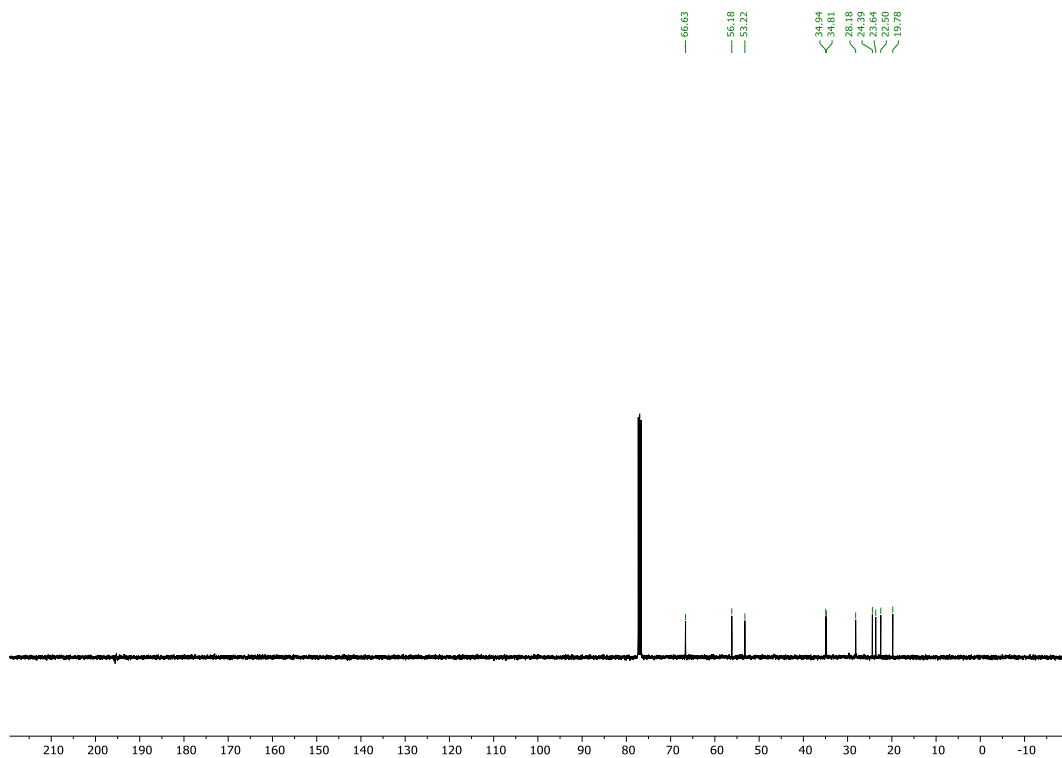

S30

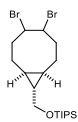

S6

$^1\text{H}$ ,  $\text{CDCl}_3$ , 400 MHz

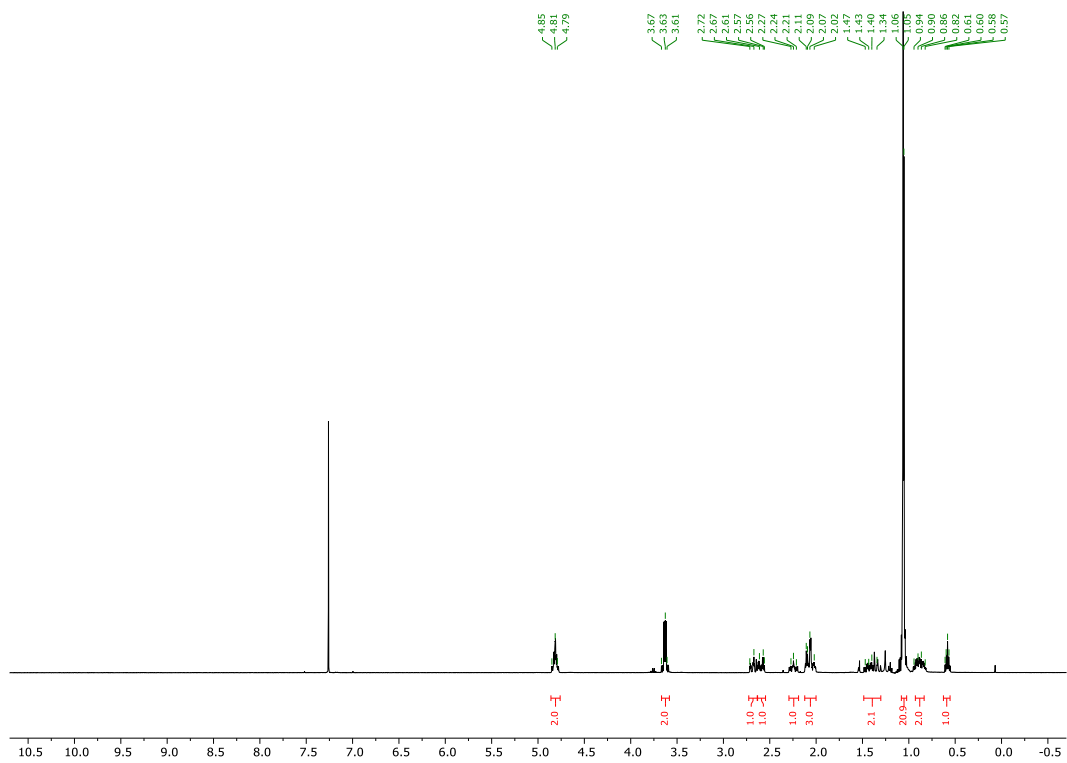

$^{13}\text{C}\{^1\text{H}\}$ ,  $\text{CDCl}_3$ , 101 MHz

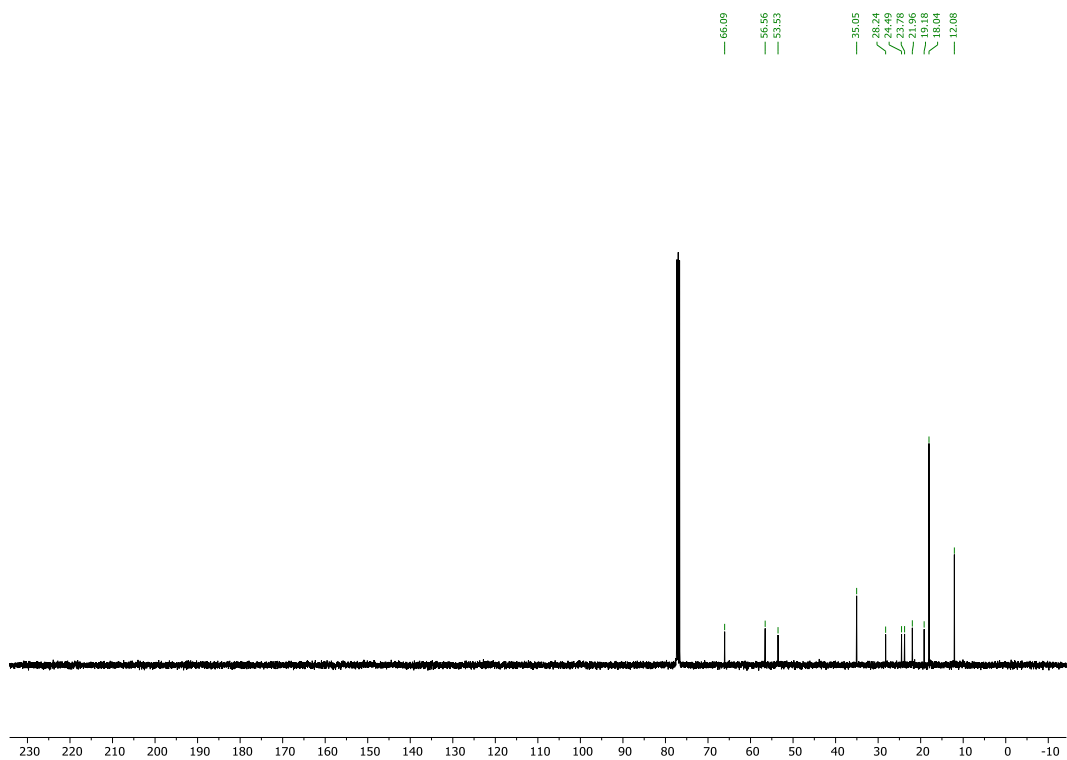

S31

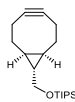

19

$^1\text{H}$ ,  $\text{CDCl}_3$ , 400 MHz

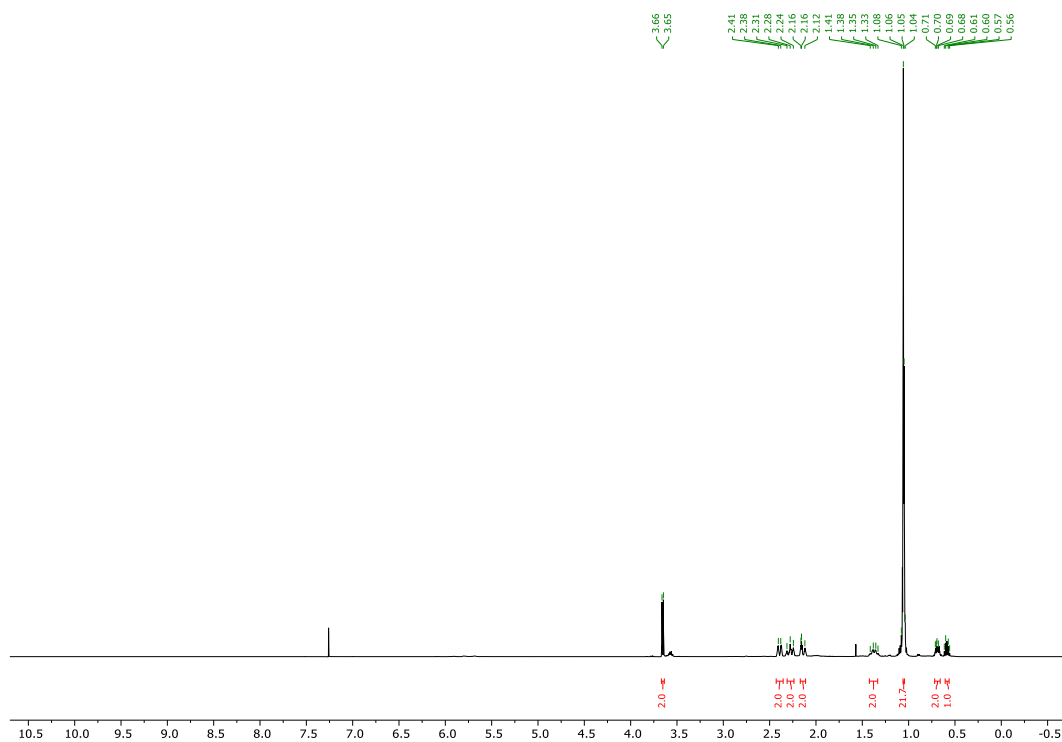

$^{13}\text{C}\{^1\text{H}\}$ ,  $\text{CDCl}_3$ , 101 MHz

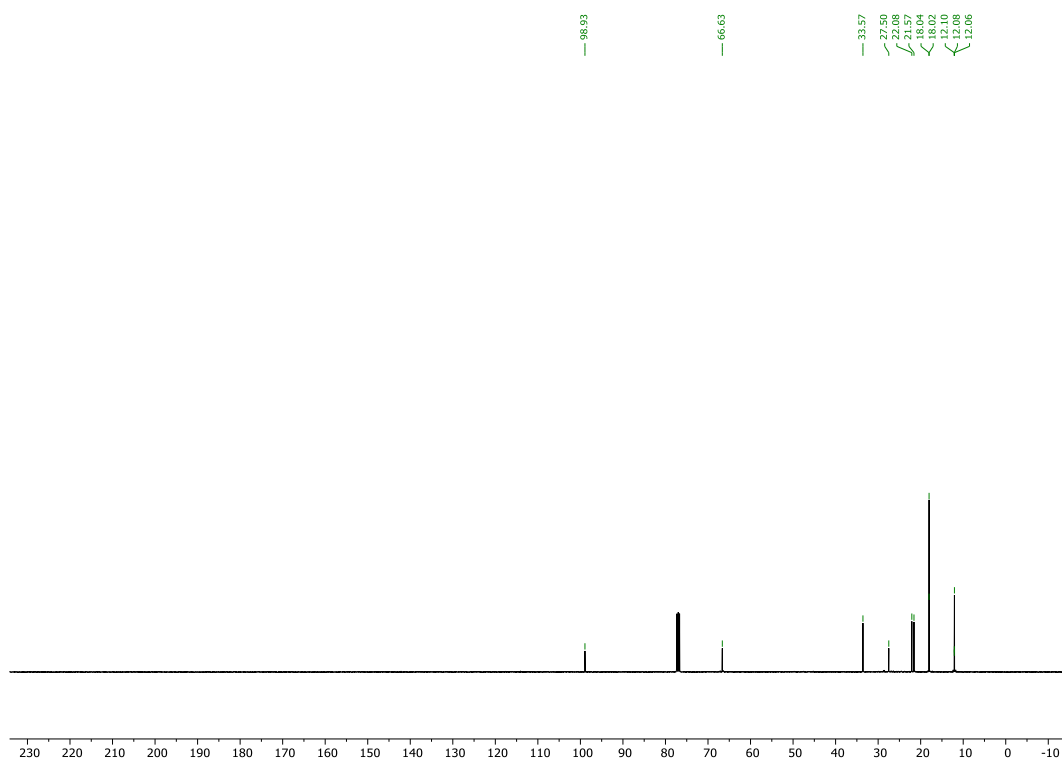



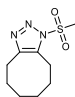

20a

$^1\text{H}$ ,  $\text{CDCl}_3$ , 500 MHz

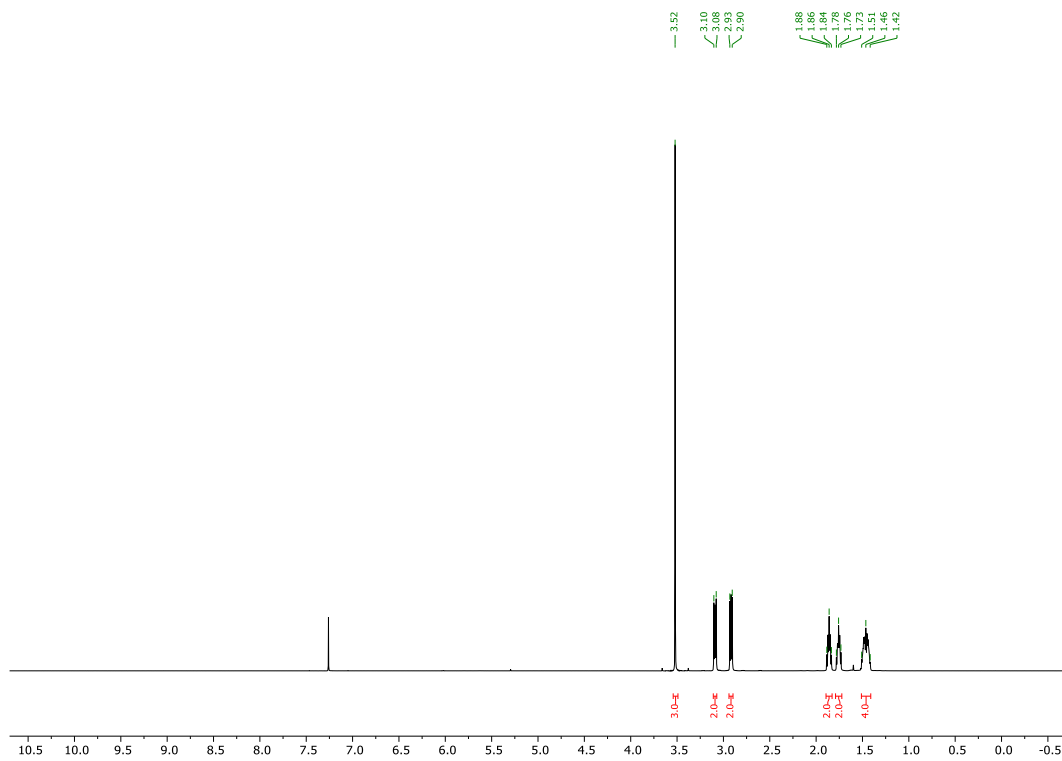

$^{13}\text{C}\{^1\text{H}\}$ ,  $\text{CDCl}_3$ , 126 MHz

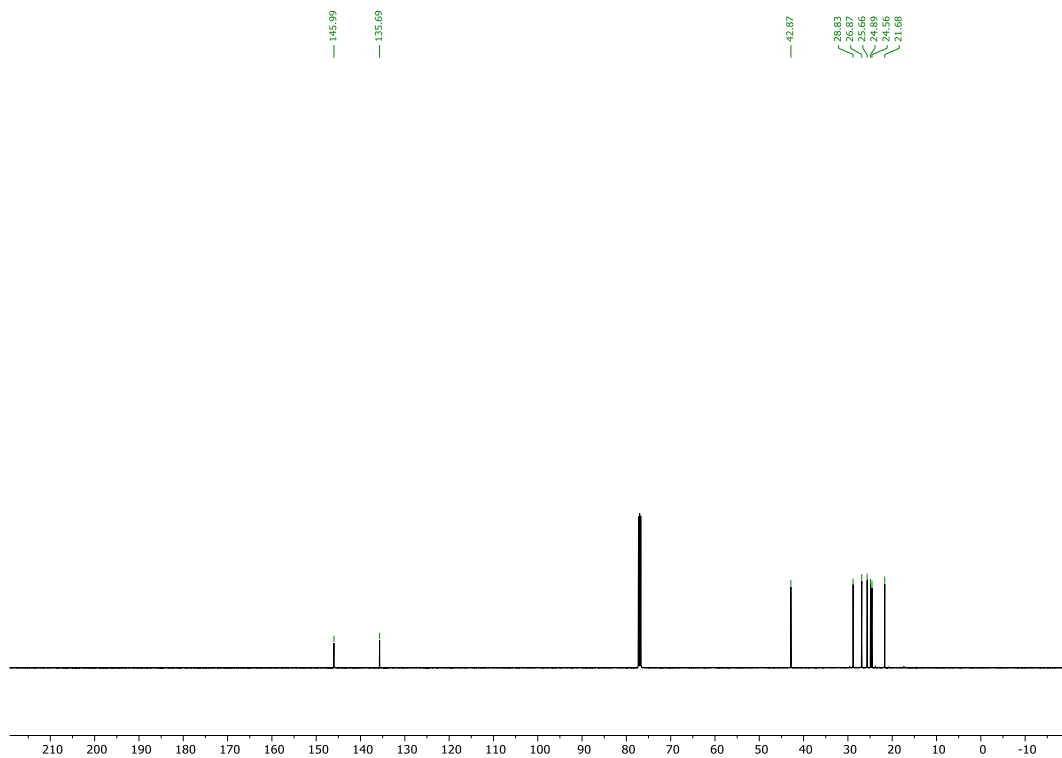

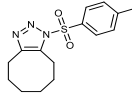

**20b**

$^1\text{H}$ ,  $\text{CDCl}_3$ , 500 MHz

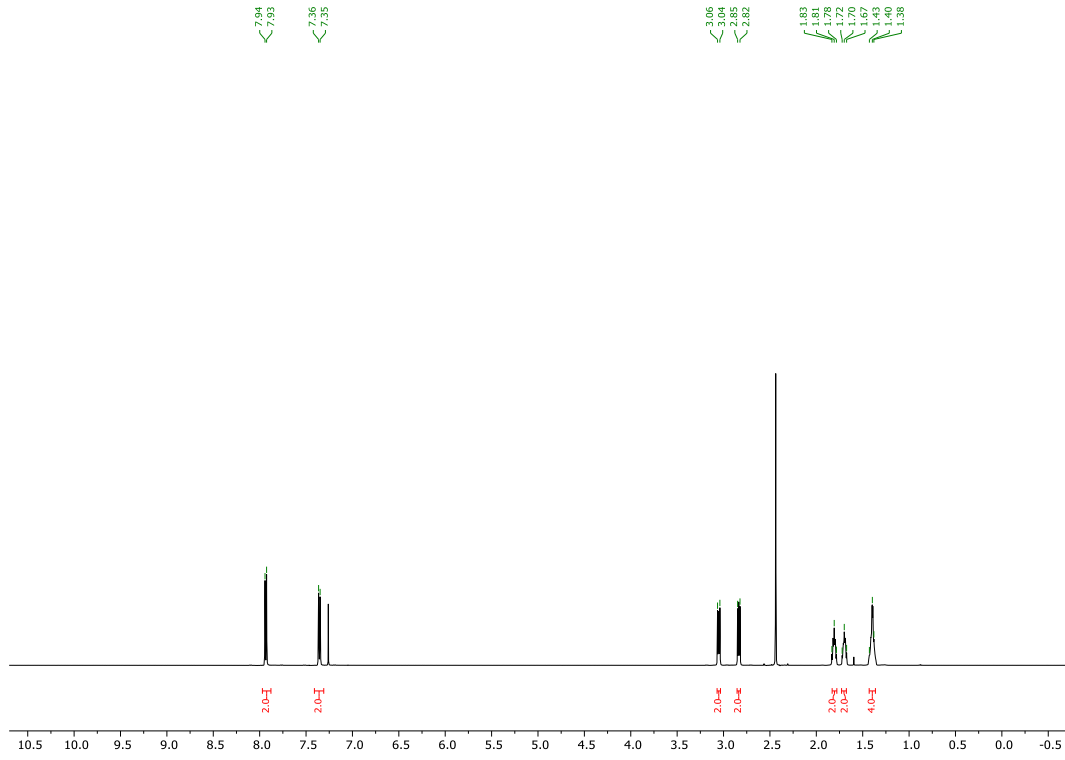

$^{13}\text{C}\{^1\text{H}\}$ ,  $\text{CDCl}_3$ , 126 MHz

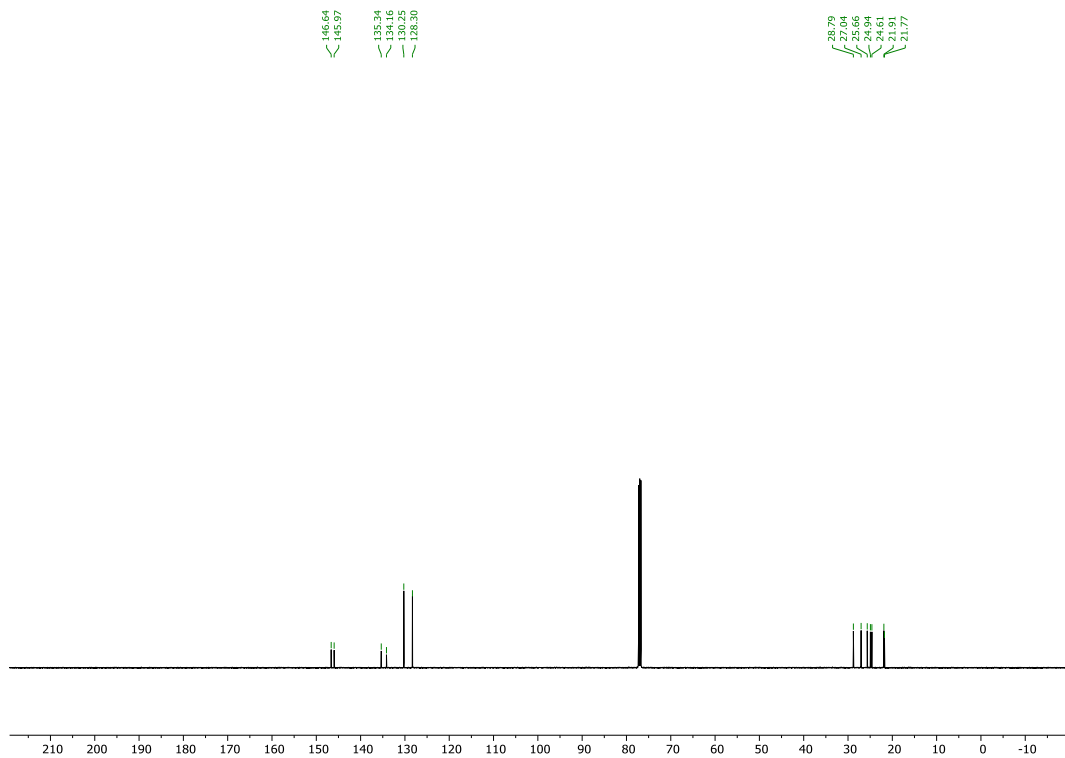

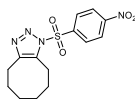

20c

$^1\text{H}$ ,  $\text{CDCl}_3$ , 500 MHz

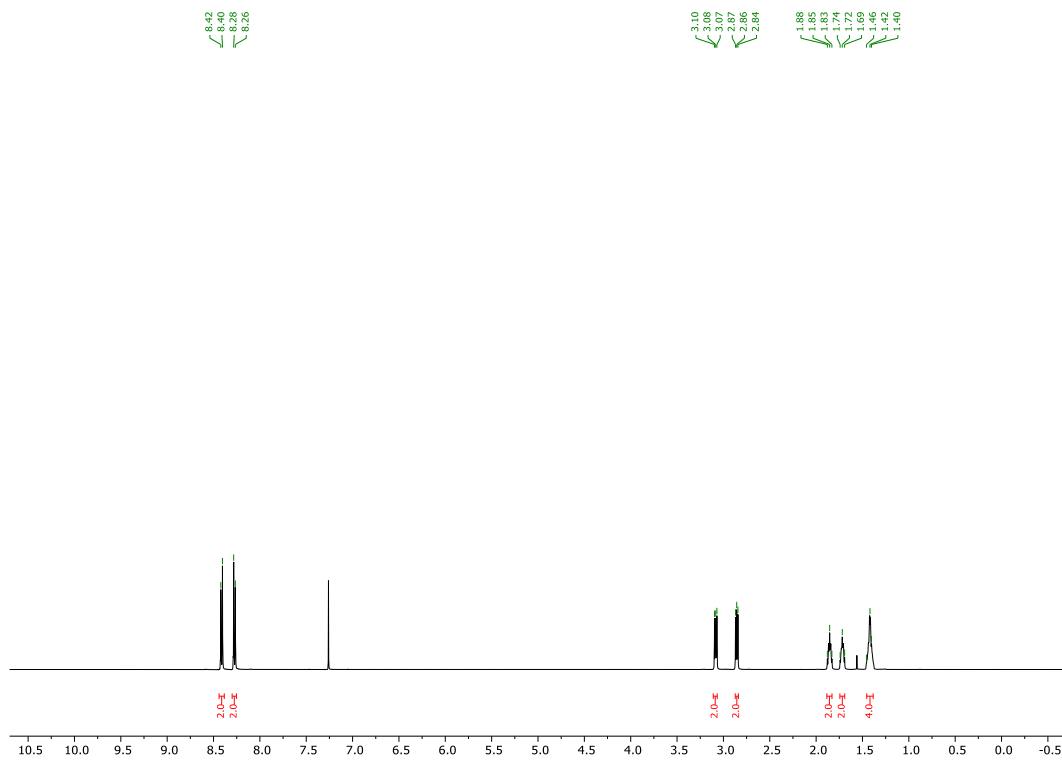

$^{13}\text{C}\{^1\text{H}\}$ ,  $\text{CDCl}_3$ , 126 MHz

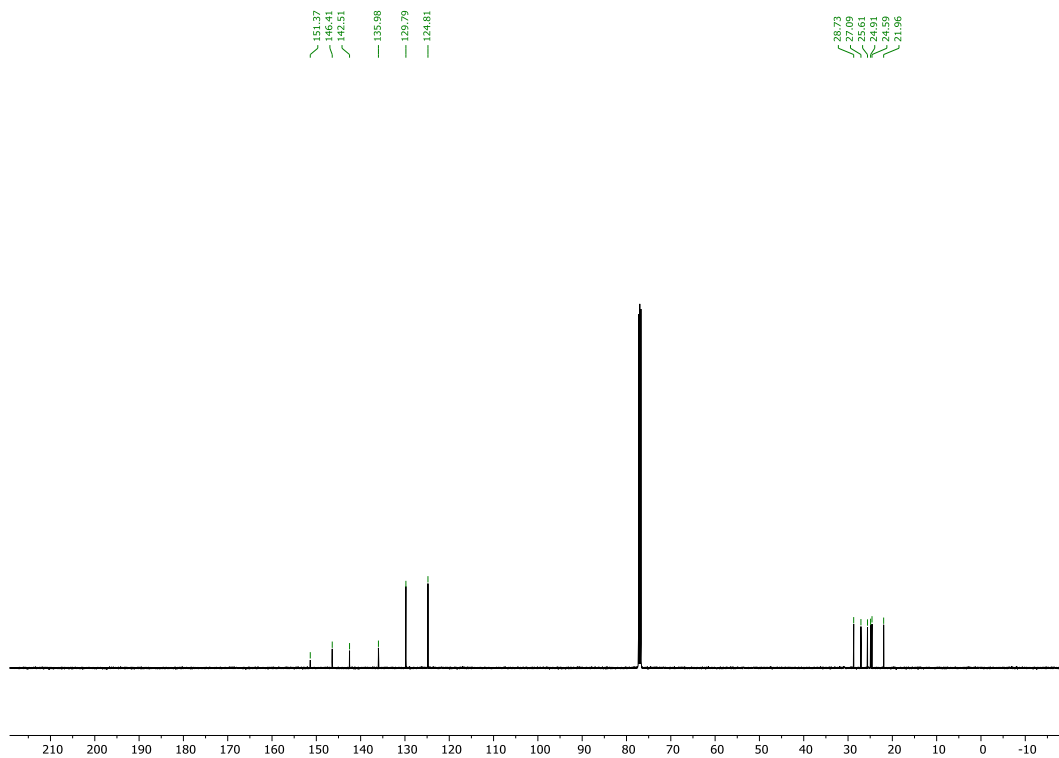

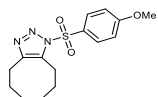

20d

$^1\text{H}$ ,  $\text{CDCl}_3$ , 500 MHz

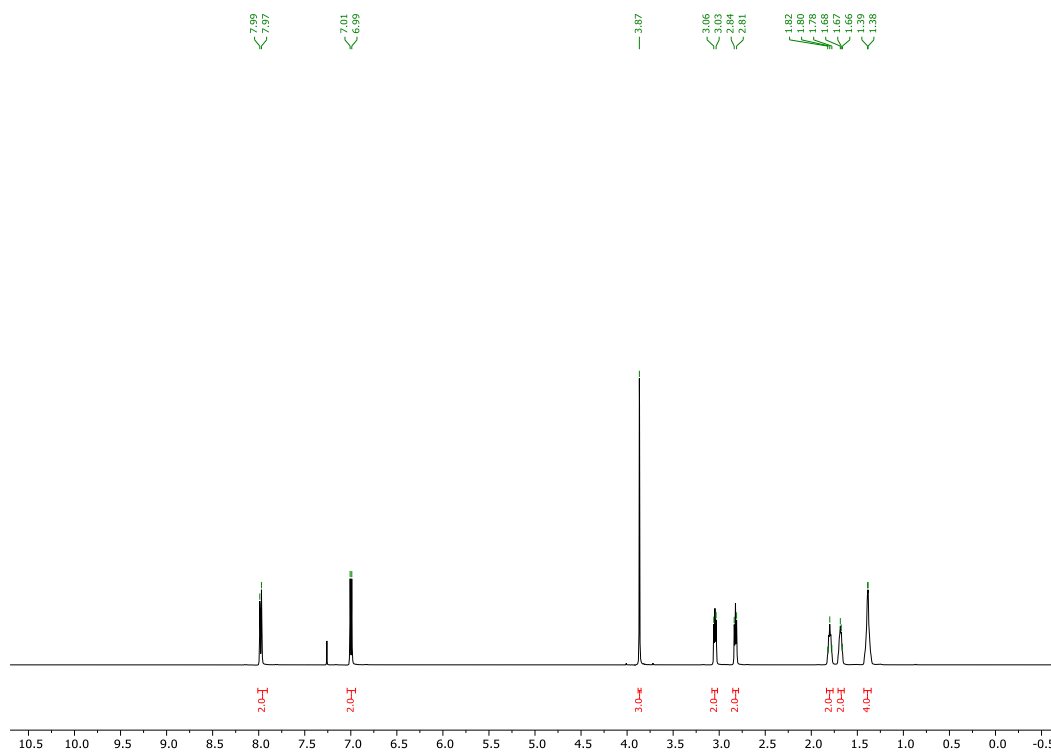

$^{13}\text{C}\{^1\text{H}\}$ ,  $\text{CDCl}_3$ , 126 MHz

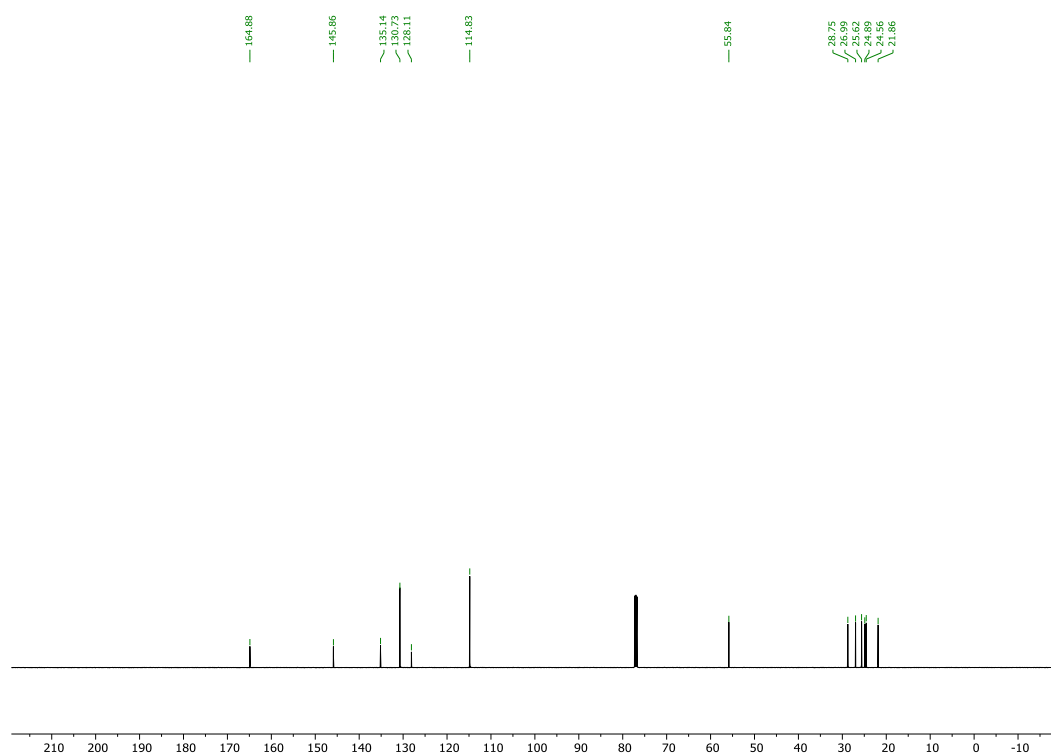

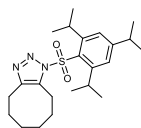

20e

$^1\text{H}$ ,  $\text{CDCl}_3$ , 500 MHz

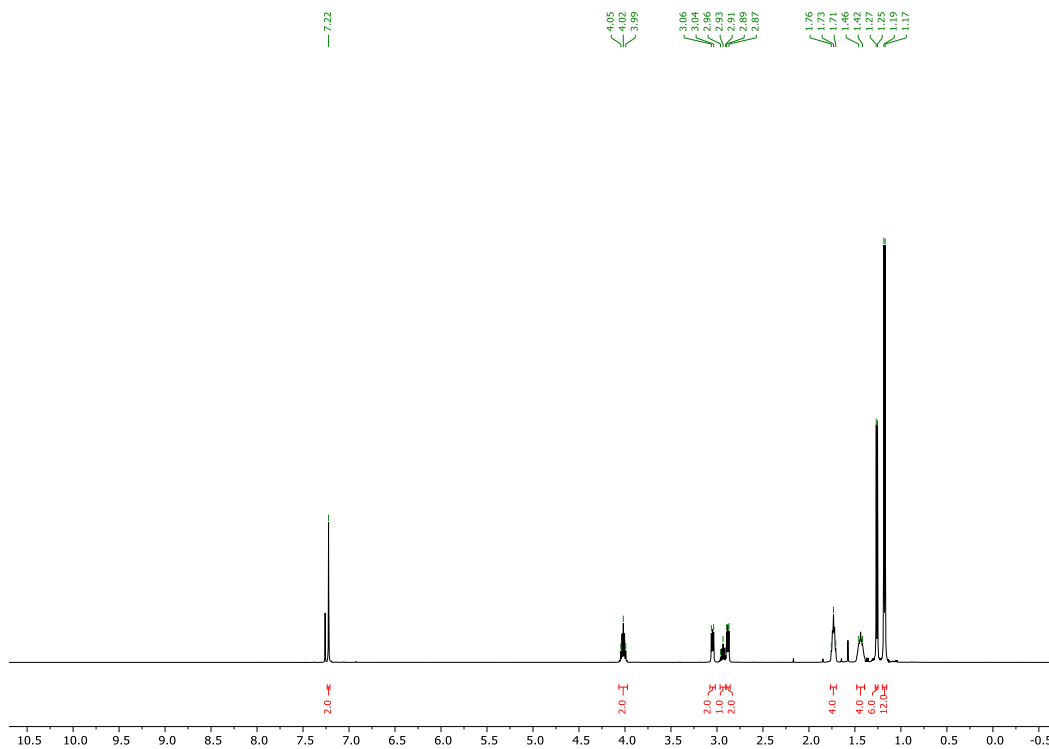

$^{13}\text{C}\{^1\text{H}\}$ ,  $\text{CDCl}_3$ , 126 MHz

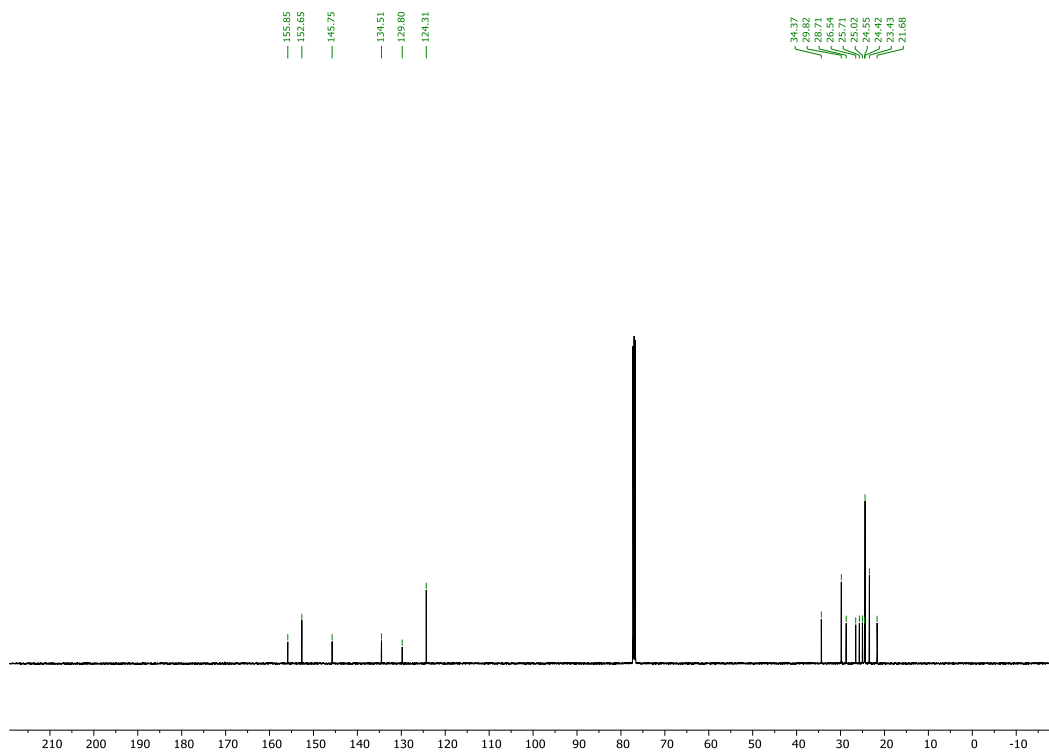

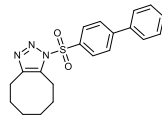

20f

$^1\text{H}$ ,  $\text{CDCl}_3$ , 500 MHz

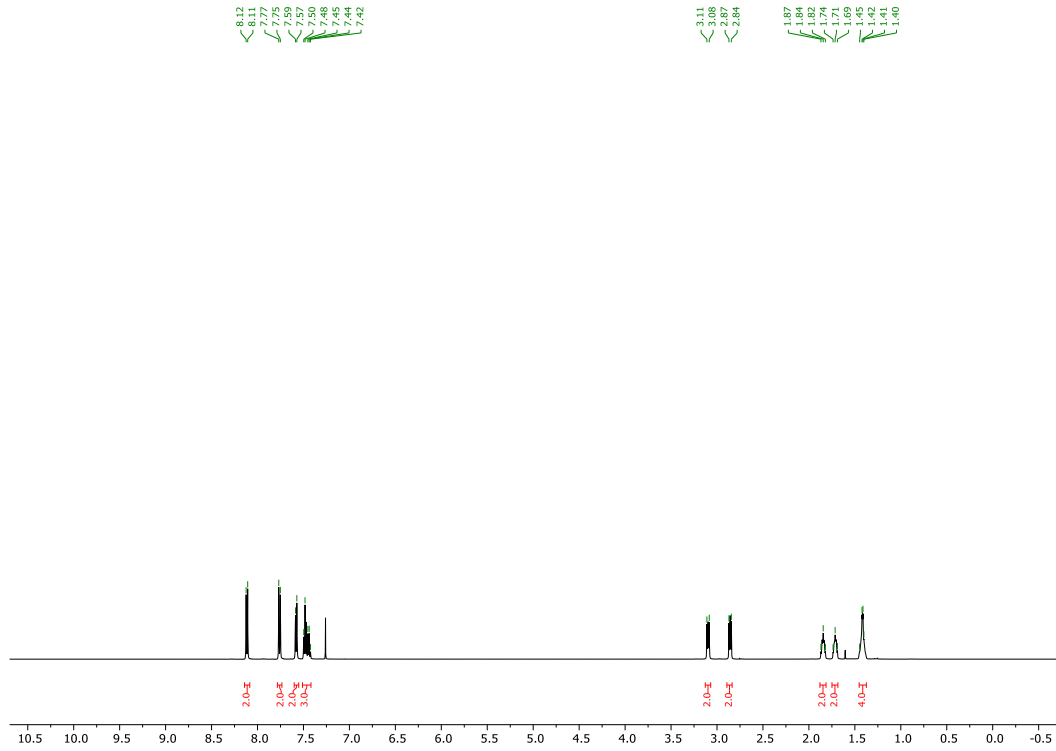

$^{13}\text{C}\{^1\text{H}\}$ ,  $\text{CDCl}_3$ , 126 MHz

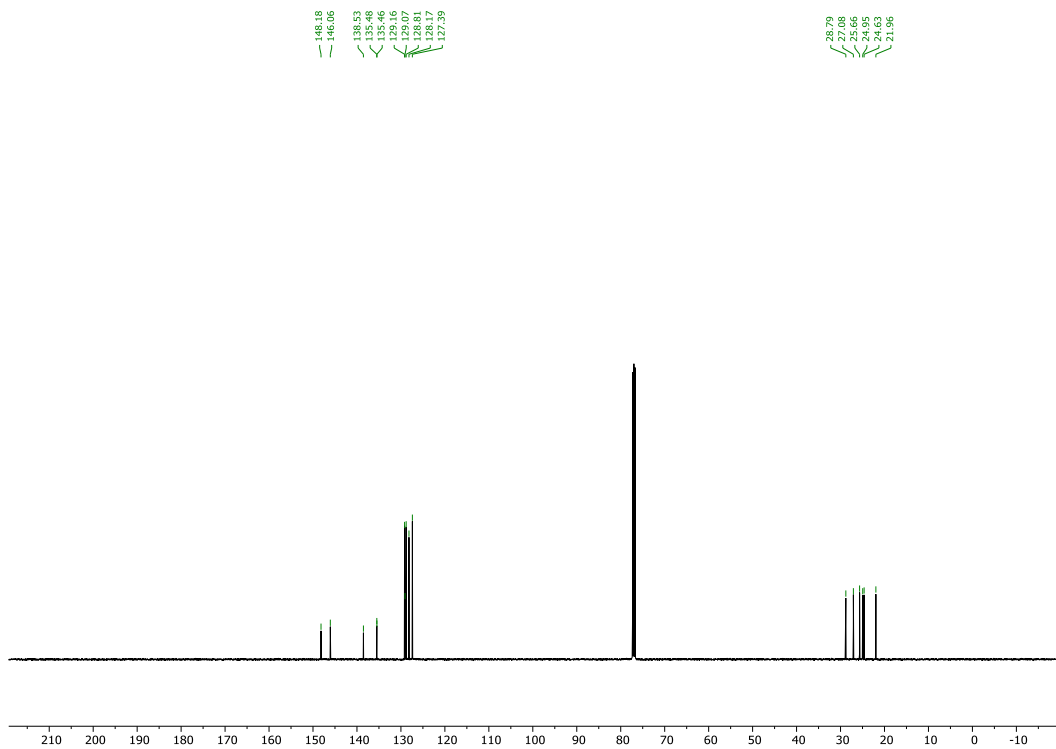

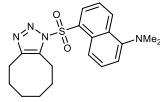

20g

$^1\text{H}$ ,  $\text{CDCl}_3$ , 500 MHz

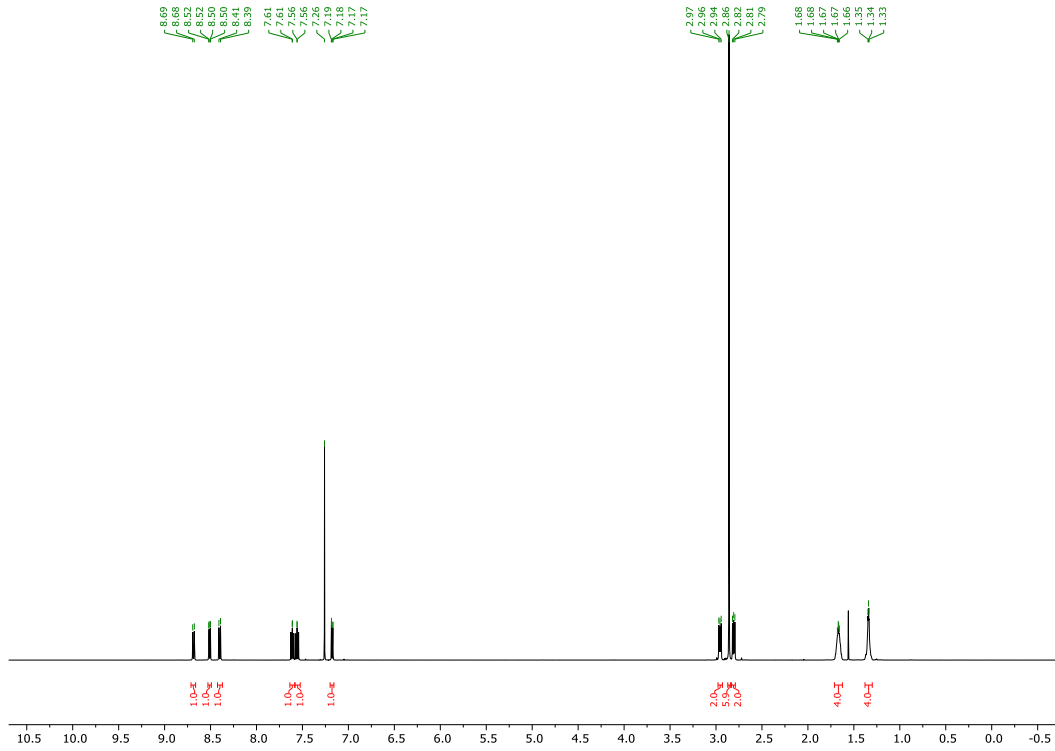

$^{13}\text{C}\{^1\text{H}\}$ ,  $\text{CDCl}_3$ , 126 MHz

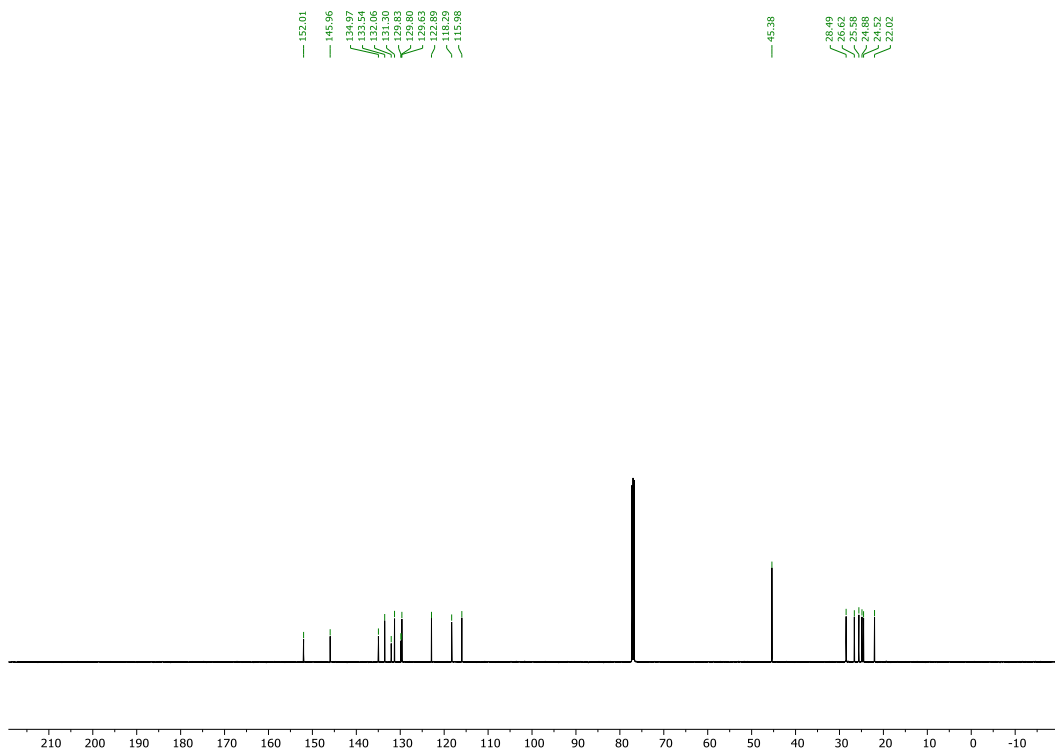

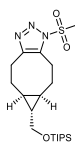

**21a**

$^1\text{H}$ ,  $\text{CDCl}_3$ , 400 MHz

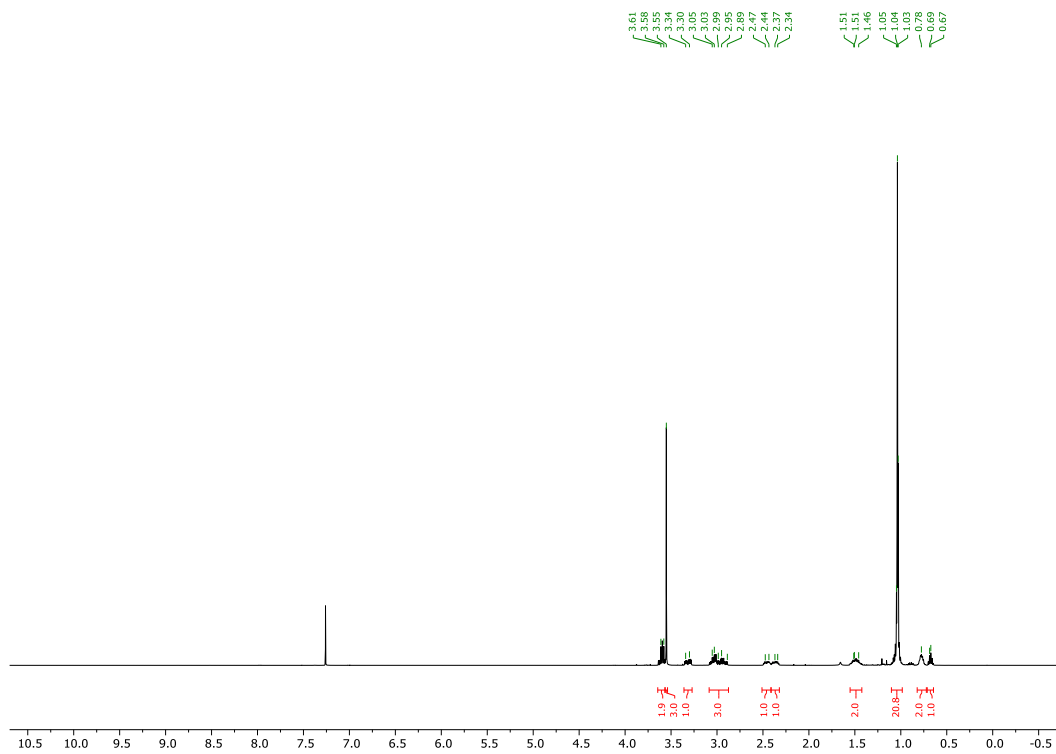

$^{13}\text{C}\{^1\text{H}\}$ ,  $\text{CDCl}_3$ , 101 MHz

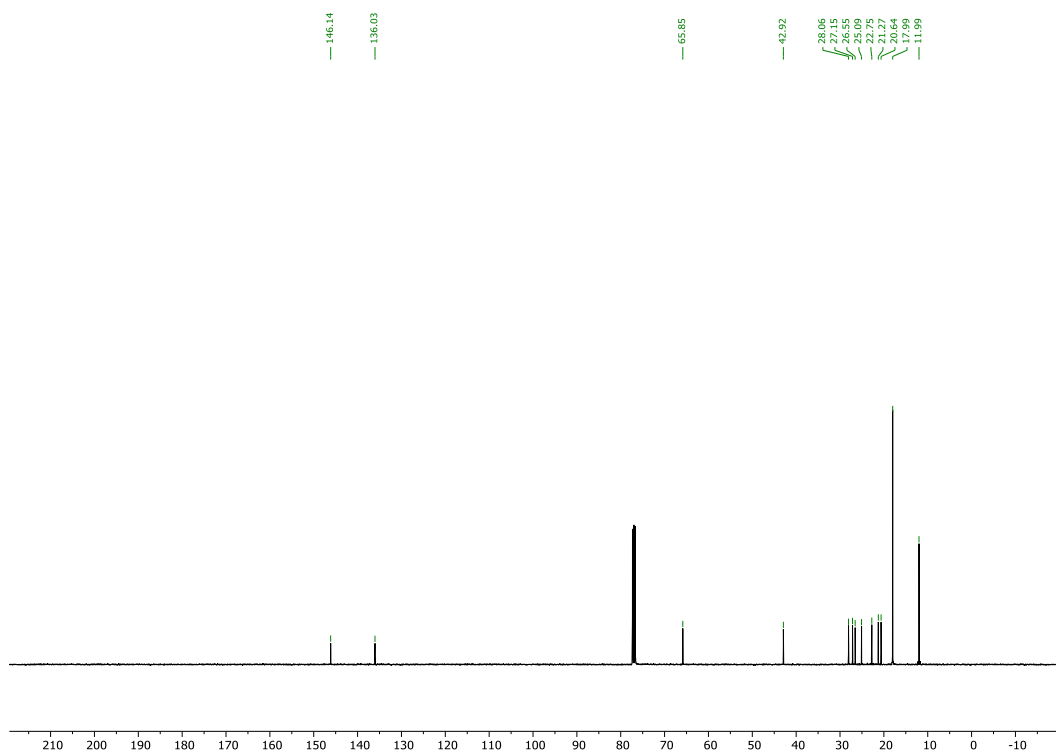



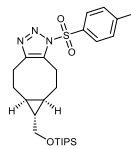

**21b**

$^1\text{H}$ ,  $\text{CDCl}_3$ , 400 MHz

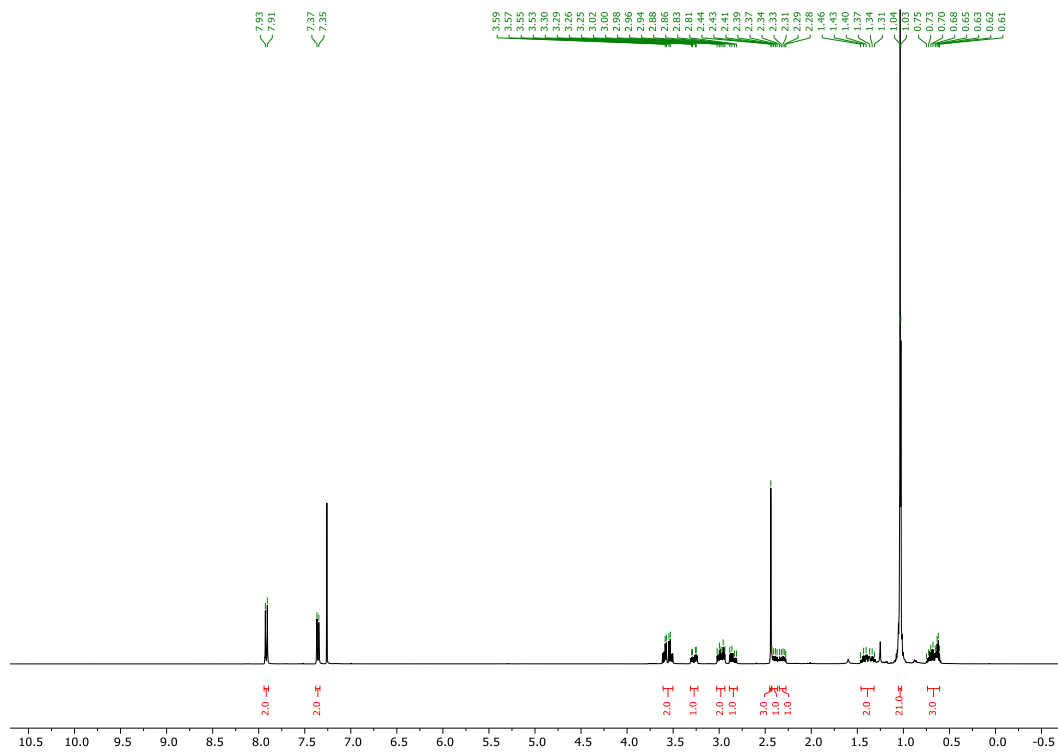

$^{13}\text{C}\{^1\text{H}\}$ ,  $\text{CDCl}_3$ , 101 MHz

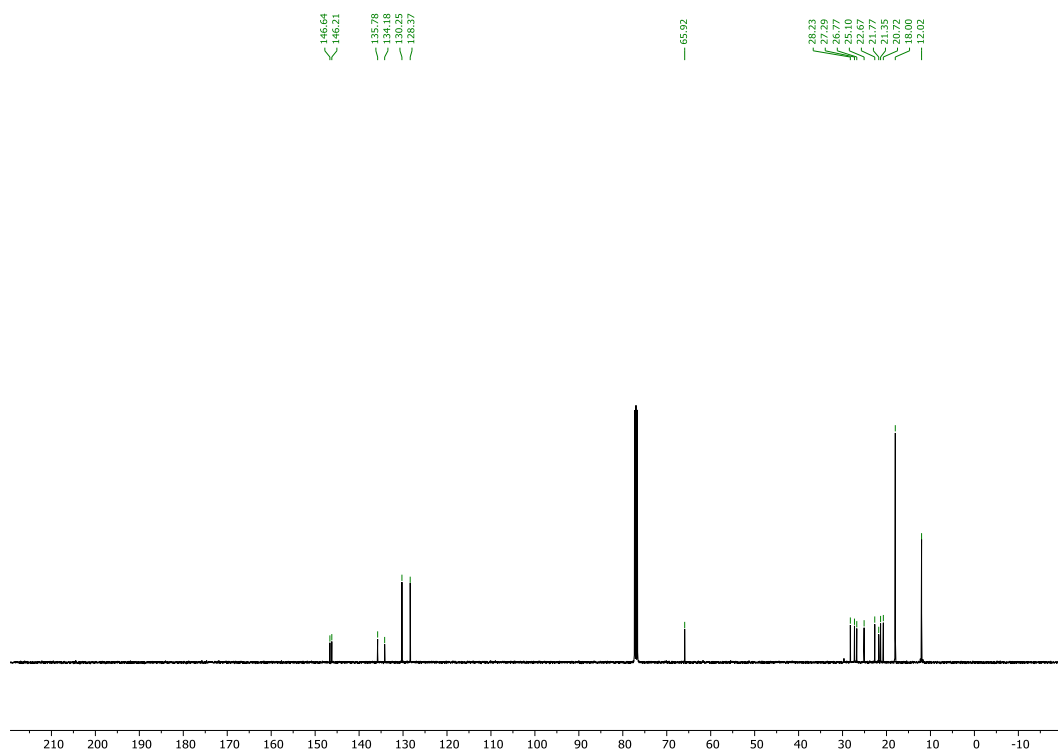

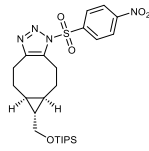

**21c**

$^1\text{H}$ ,  $\text{CDCl}_3$ , 400 MHz

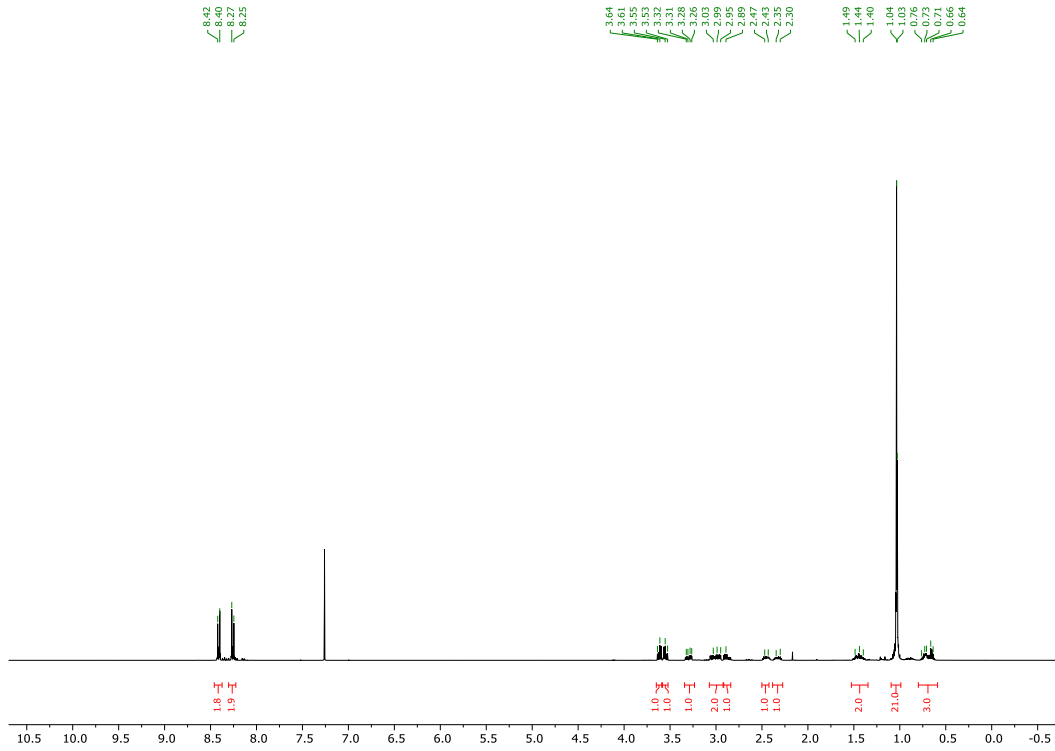

$^{13}\text{C}\{^1\text{H}\}$ ,  $\text{CDCl}_3$ , 101 MHz

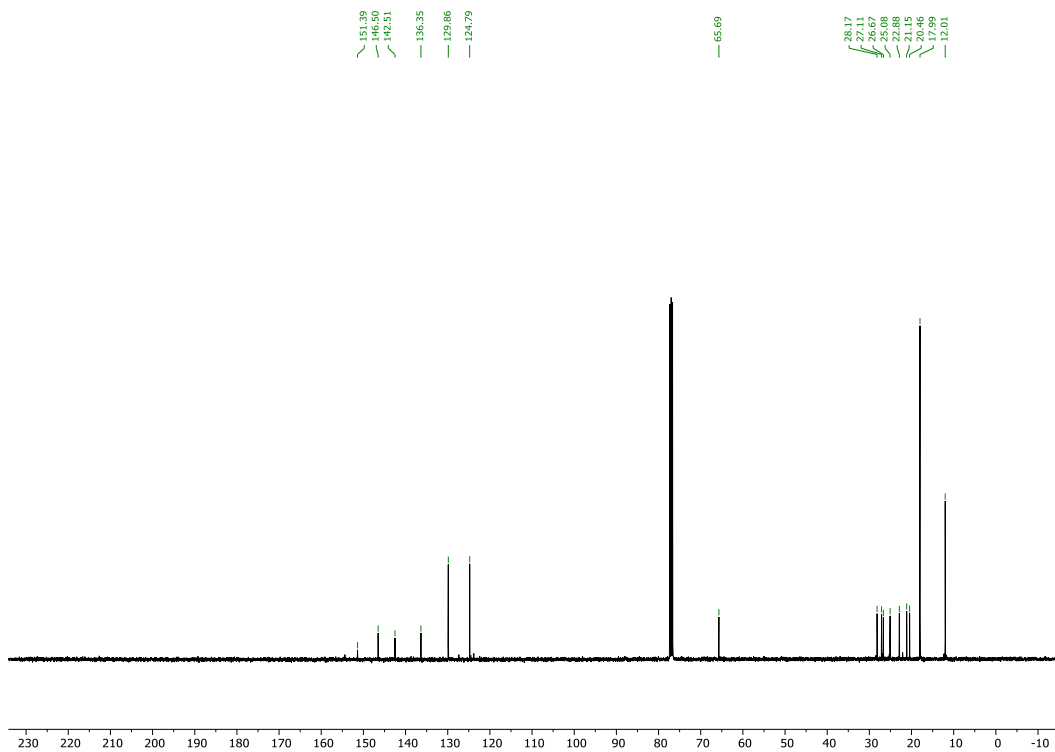

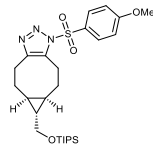

21d

$^1\text{H}$ ,  $\text{CDCl}_3$ , 400 MHz

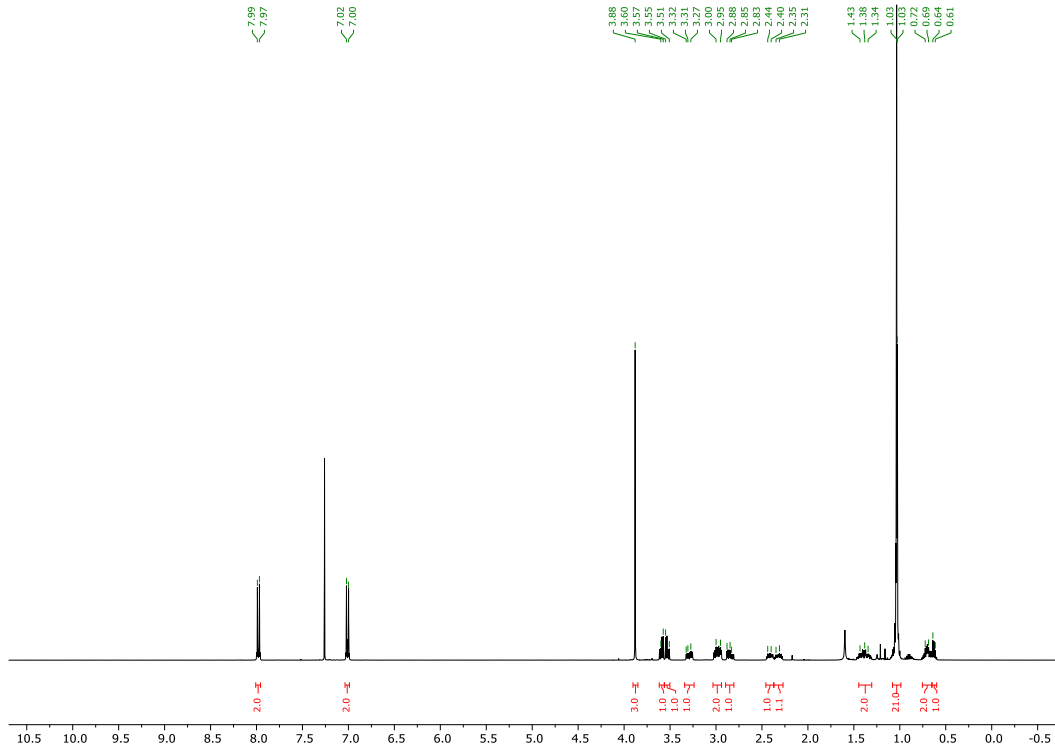

$^{13}\text{C}\{^1\text{H}\}$ ,  $\text{CDCl}_3$ , 101 MHz

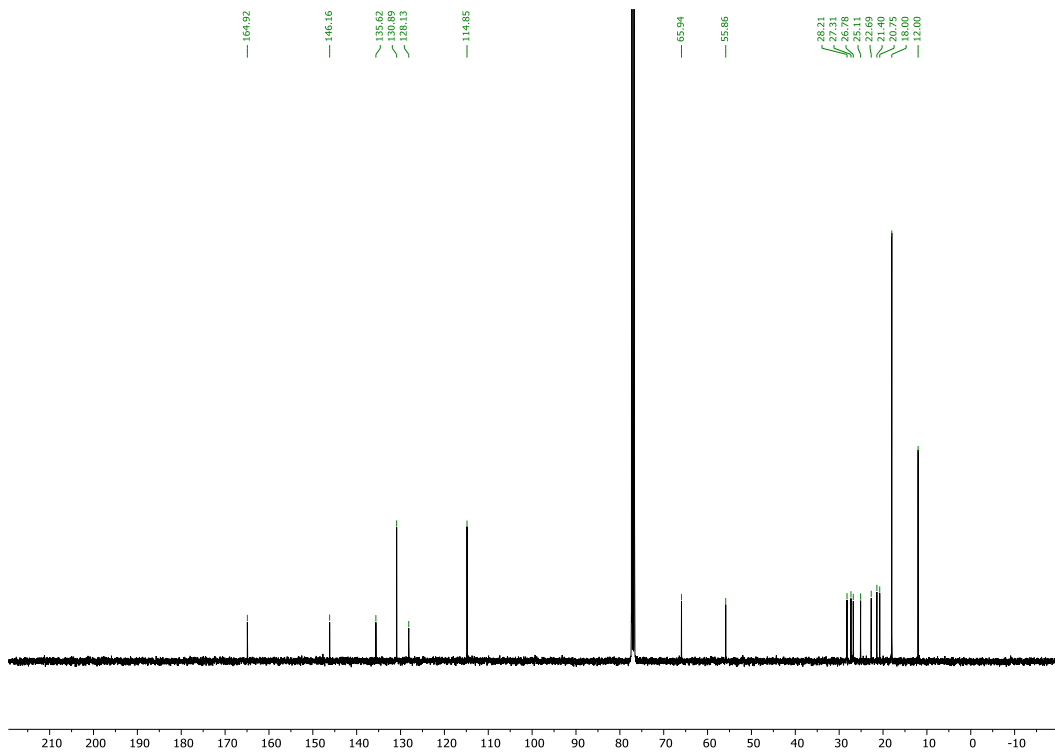



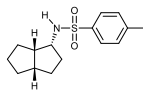

**22b**

$^1\text{H}$ ,  $\text{CDCl}_3$ , 400 MHz

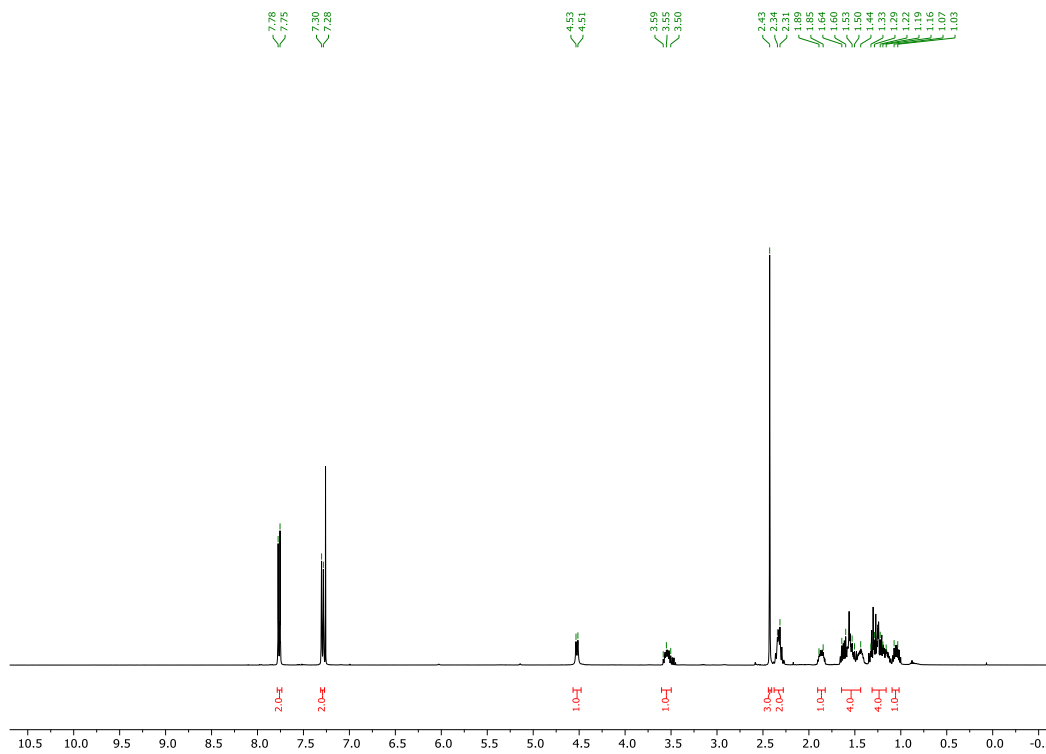

$^{13}\text{C}\{^1\text{H}\}$ ,  $\text{CDCl}_3$ , 101 MHz

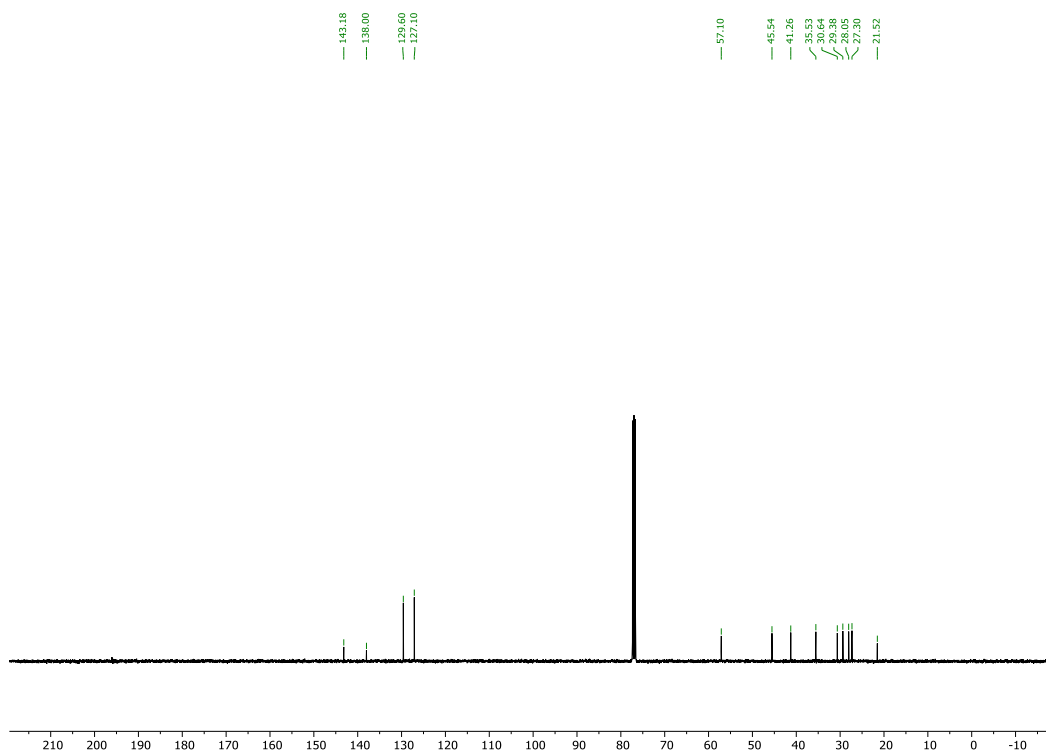

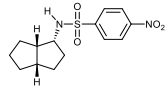

22c

$^1\text{H}$ ,  $\text{CDCl}_3$ , 500 MHz

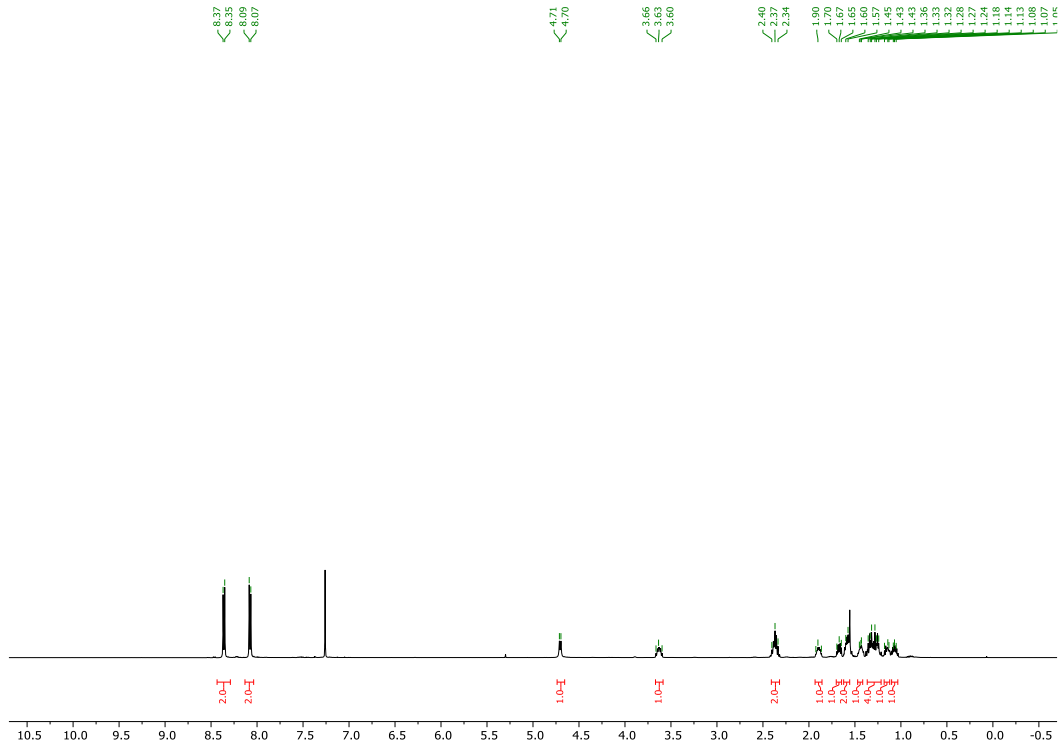

$^{13}\text{C}\{^1\text{H}\}$ ,  $\text{CDCl}_3$ , 126 MHz

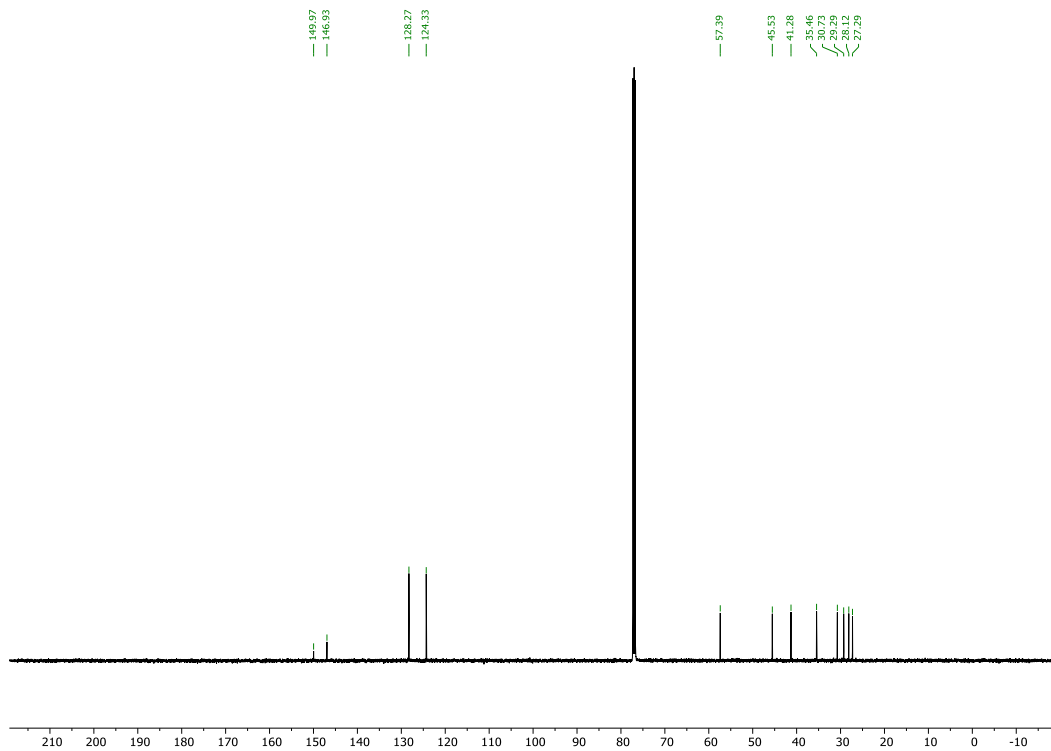







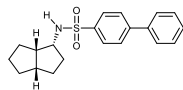

**22f**

$^1\text{H}$ ,  $\text{CDCl}_3$ , 500 MHz

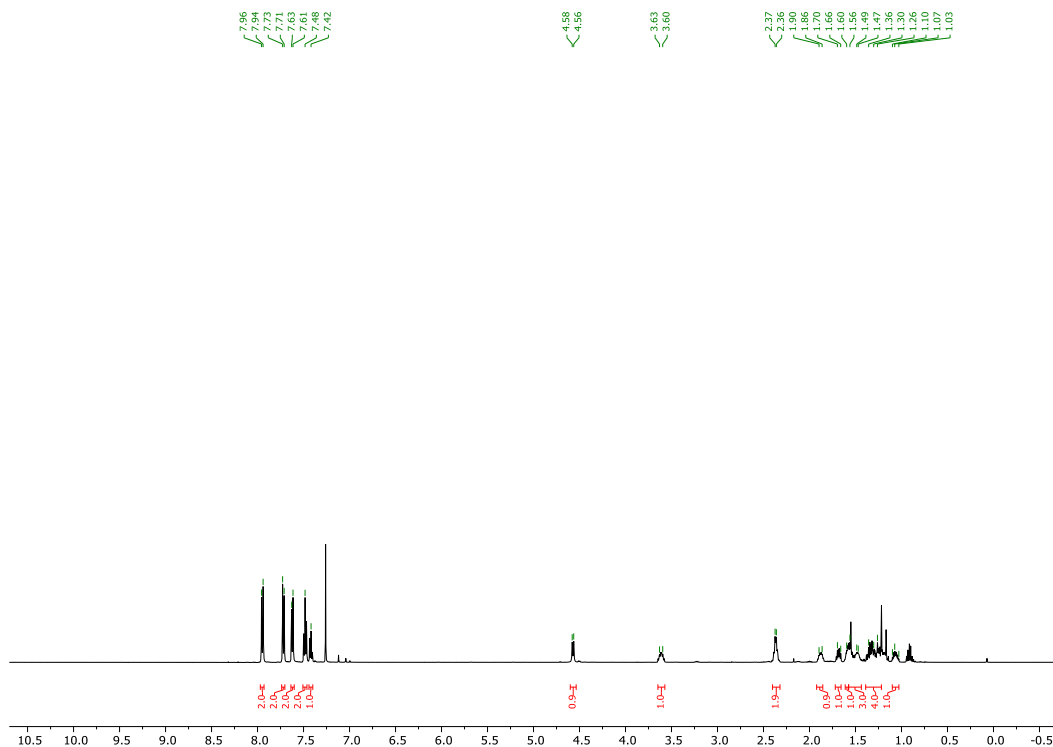

$^{13}\text{C}\{^1\text{H}\}$ ,  $\text{CDCl}_3$ , 126 MHz

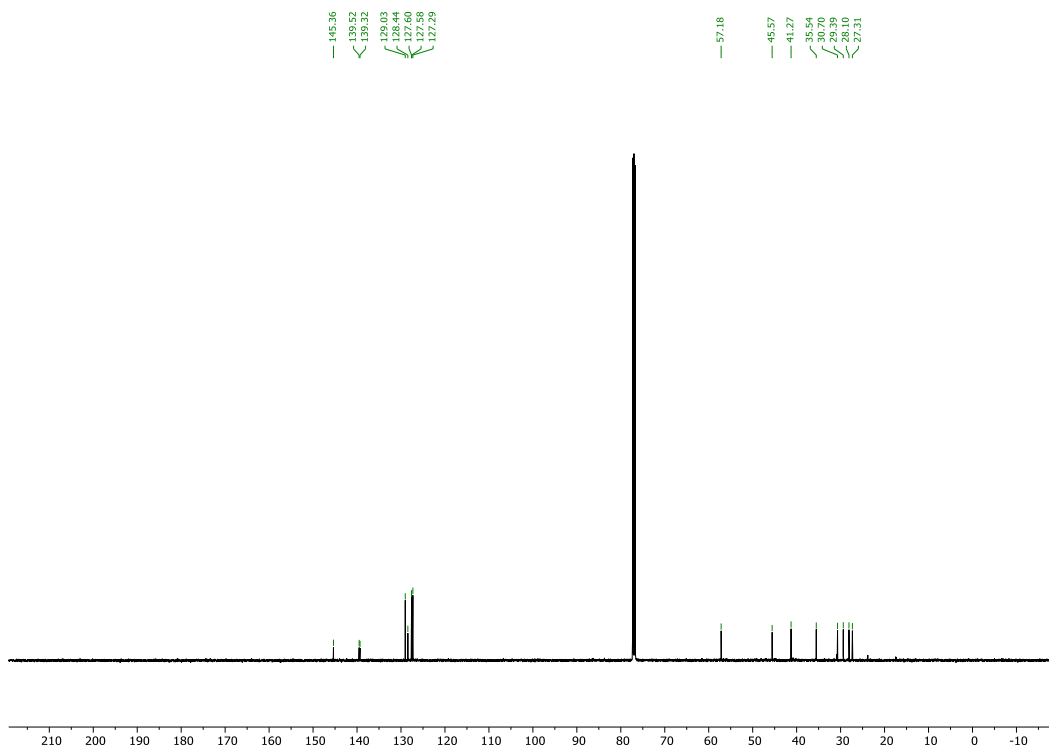

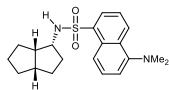

**22g**

$^1\text{H}$ ,  $\text{CDCl}_3$ , 500 MHz

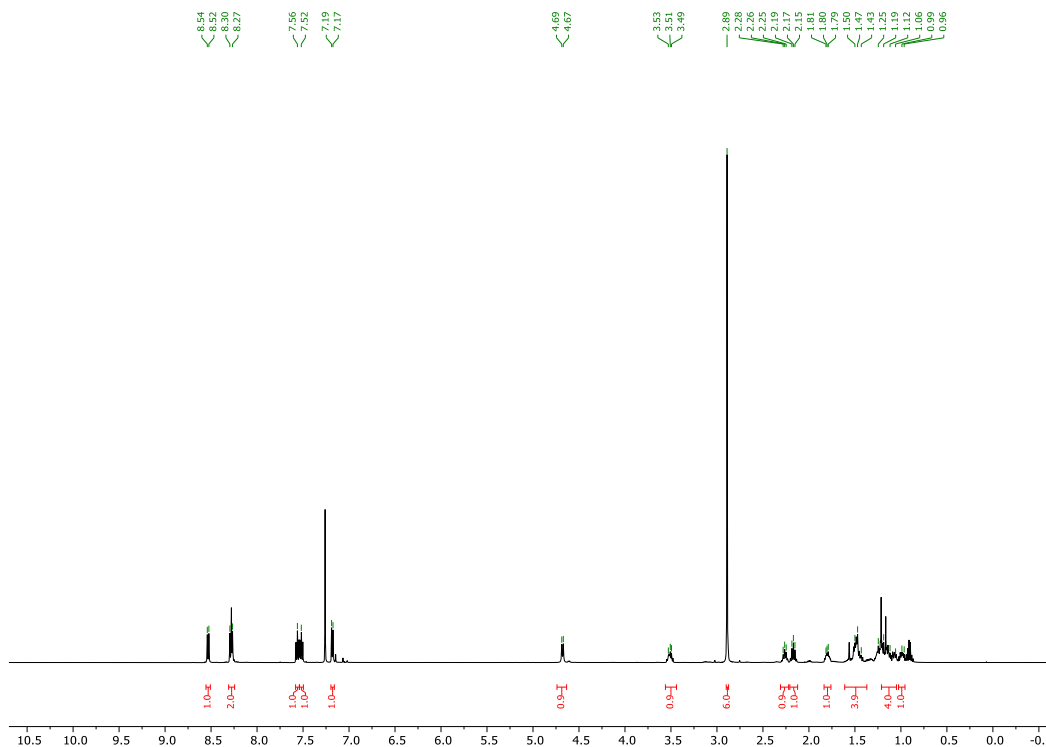

$^{13}\text{C}\{^1\text{H}\}$ ,  $\text{CDCl}_3$ , 126 MHz

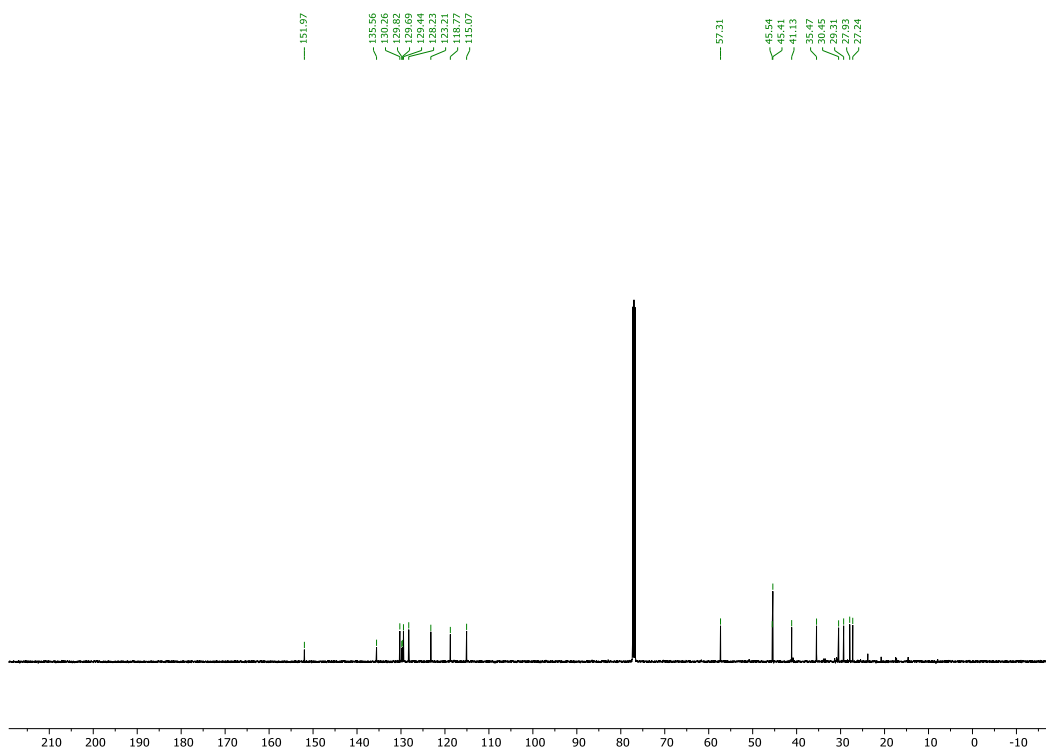

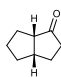

23

$^1\text{H}$ ,  $\text{CDCl}_3$ , 500 MHz

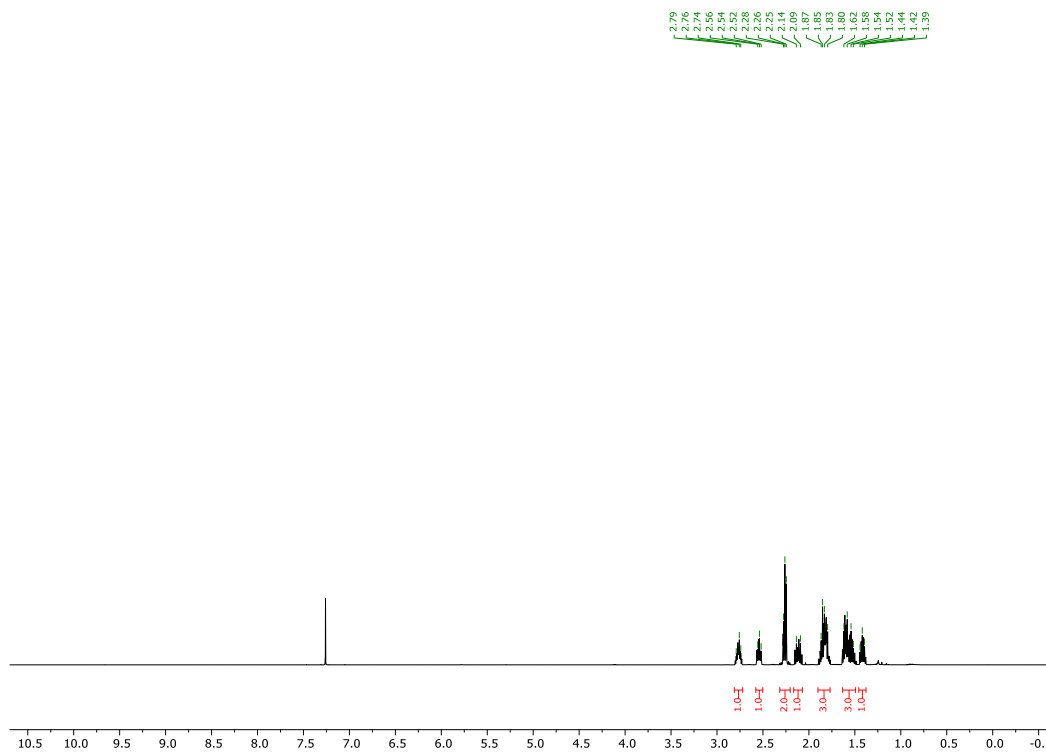

$^{13}\text{C}\{^1\text{H}\}$ ,  $\text{CDCl}_3$ , 101 MHz

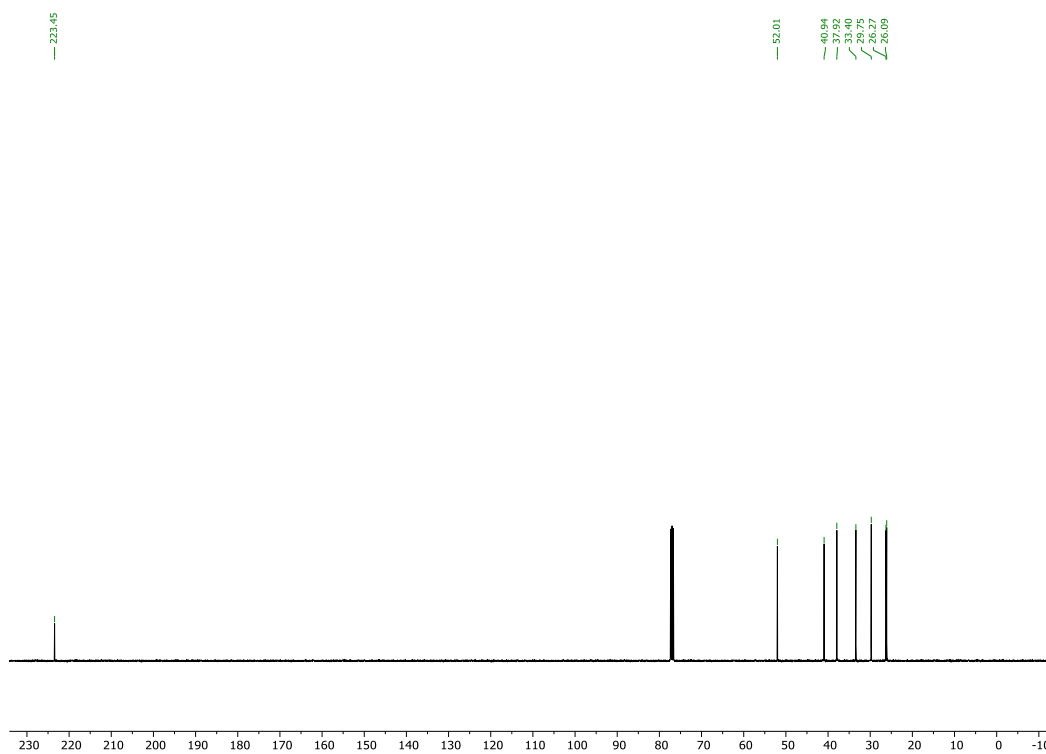

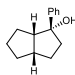

24

$^1\text{H}$ ,  $\text{CDCl}_3$ , 400 MHz

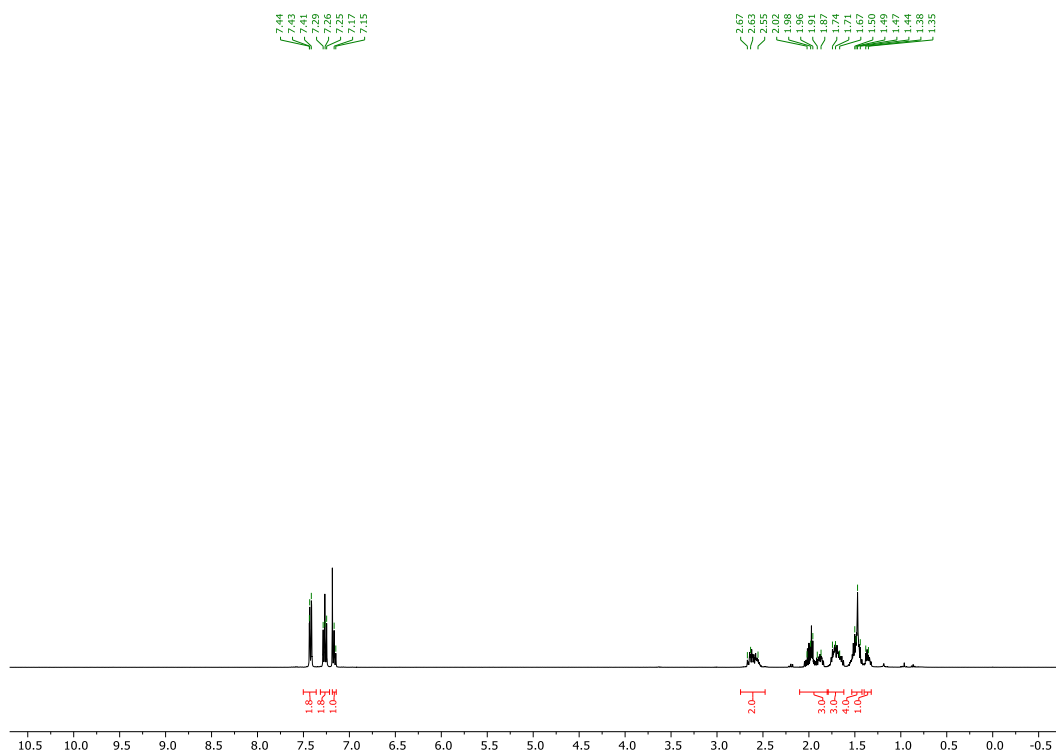

$^{13}\text{C}\{^1\text{H}\}$ ,  $\text{CDCl}_3$ , 101 MHz

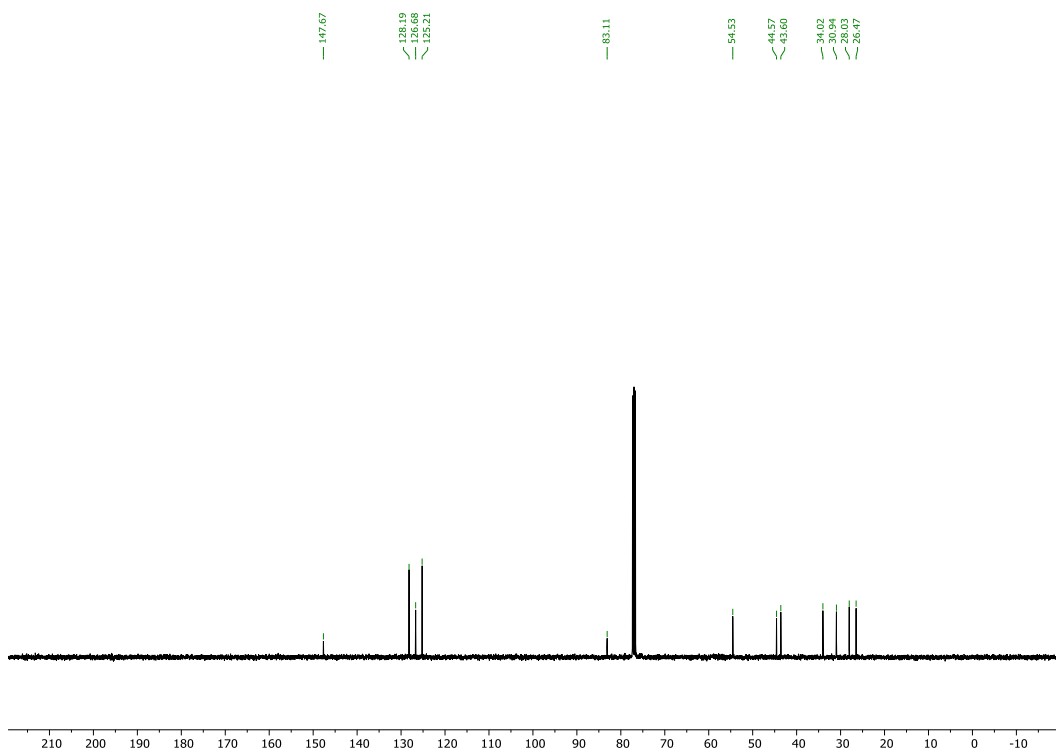

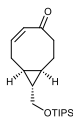

25

$^1\text{H}$ ,  $\text{CDCl}_3$ , 400 MHz

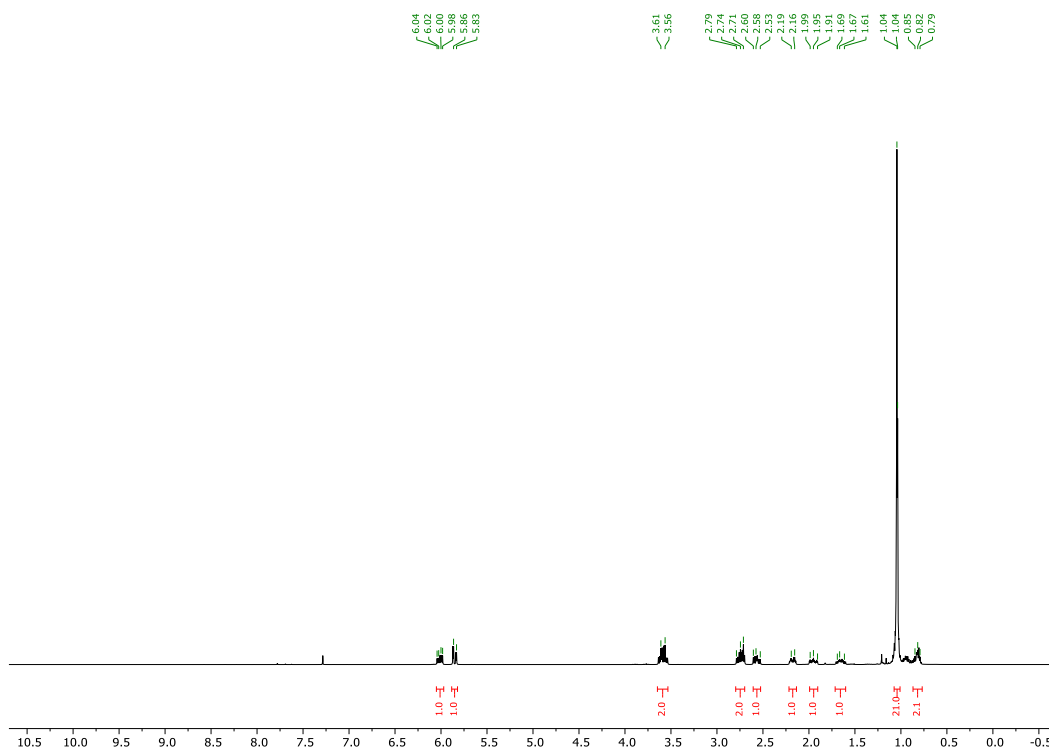

$^{13}\text{C}\{^1\text{H}\}$ ,  $\text{CDCl}_3$ , 101 MHz

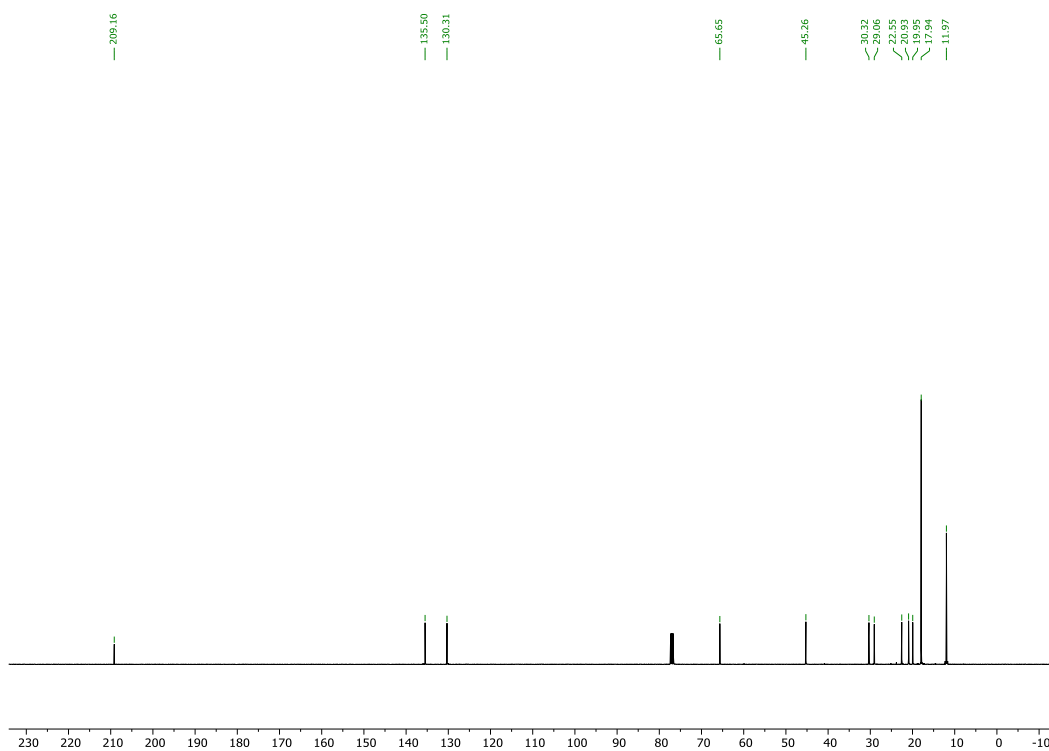

## Optimised Structures and Thermochemical Analyses

Calculations were performed on the PSI4 program.<sup>[6]</sup>

Geometry optimisation and thermochemistry analysis was performed using B3LYP/6-31G(d).

Molecular orbitals were calculated using HF/6-311++G(2d,p) at B3LYP/6-31G(d) geometry.

Ground state structures were optimised and found to have zero imaginary frequencies by vibrational analysis:

- **GS1:** Methanesulfonyl azide
- **GS2:** Cyclooctyne in a chair conformation
- **GS3:** Bicyclononyne
- **GS4:** Acetylene

Geometries were inspired by previous work by the groups of Zeng<sup>[7]</sup> and Houk.<sup>[8]</sup>

Transition structures were optimised and found to have exactly one imaginary frequency by vibrational analysis:

- **TS1:** MsN<sub>3</sub> + Cyclooctyne
- **TS2:** MsN<sub>3</sub> + BCN
- **TS3:** MsN<sub>3</sub> + Acetylene

Geometries were inspired by previous work by groups of Houk<sup>[8]</sup> and Bickelhaupt *et al.*<sup>[9]</sup>

Distortion interaction analysis was performed following the work in this area by Houk *et al.*<sup>[8]</sup>

Cycloaddition between MsN<sub>3</sub> and cyclooctyne in its twist boat geometry was found to be a less favourable pathway than ring flip<sup>[10]</sup> to the cyclooctyne chair conformation and then cycloaddition so was not considered.

GS1

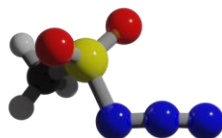

B3LYP/6-31G(D) optimised cartesian coordinates in Å

```
C -1.608519319467  1.457500593759 -0.063963233043
H -2.591326236454  1.284233387220  0.380714572510
H -1.703330072376  1.703787214968 -1.122526158519
H -1.066467955548  2.232920246299  0.478506732644
N  0.730021096991  0.400535623236 -0.835722057356
N  1.790949197114  0.048652886187 -0.287660921488
N  2.807257072661 -0.226759045565  0.137837070379
O -1.393245800251 -1.114220638337 -0.699273589930
O -0.315596877748 -0.322374532977  1.469000339776
S -0.706036913645 -0.090337630567  0.078877676271
```

```
N1-N2 distance      :  1.245 Å
N2-N3 distance      :  1.136 Å
Azide N-N-N angle   : 174.96°
```

B3LYP/6-31G(D) frequency analysis

Number of imaginary frequencies: 0

```
E0 :   -752.66557042 Ha
ZPE:   -752.60487666 Ha
H   :   -752.59652407 Ha
S   :         0.13770244 mHa/K
G   :   -752.63758005 Ha
evaluated at 298.15 K
```

```
      HOMO-1      HOMO      LUMO      LUMO+1
-12.434656  -11.815705   0.902765   1.685338 eV  HF/6-311++G(2D,P)
```

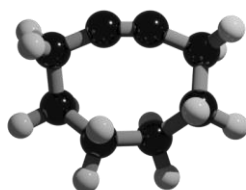

B3LYP/6-31G(D) optimised cartesian coordinates in Å

```

C  -1.950674577258  -0.872434863451  -0.132659300671
C  -1.854882674202  0.620417969012  0.290791614893
C  -0.698207387431  1.429617578033  -0.353182137875
C  -0.604210769791  -1.431719108537  -0.035598782290
C   0.604281019996  -1.431678020515  0.035652352377
C   0.698135403896  1.429670144360  0.353127403667
C   1.854853651130  0.620505769309  -0.290812981004
C   1.950717841297  -0.872327732409  0.132691459716
H  -2.810441636177  1.102275105372  0.042928450235
H  -2.681695085584  -1.395968343418  0.496870195418
H  -2.319706995271  -0.946365782036  -1.165443627177
H  -1.758620098866  0.666886709905  1.383247961761
H  -1.037120632674  2.472810040819  -0.389173207832
H  -0.580908227713  1.124072540978  -1.401817423593
H   0.580853087312  1.124162616689  1.401775545124
H   1.036992982379  2.472882213043  0.389074632411
H   1.758592832225  0.666931041743  -1.383271340529
H   2.319755234564  -0.946203531625  1.165477957667
H   2.681762036372  -1.395848927384  -0.496820741601
H   2.810387577134  1.102419277917  -0.042963050523

```

Alkyne C-C distance : 1.211 Å  
 Alkyne bond angles : 157.48°, 157.48°

B3LYP/6-31G(D) frequency analysis

Number of imaginary frequencies: 0

```

E0 :   -312.00018962 Ha
ZPE:   -311.81936907 Ha
H   :   -311.81059064 Ha
S   :     0.13622001 mHa/K
G   :   -311.85120464 Ha
evaluated at 298.15 K

```

```

      HOMO-1      HOMO      LUMO      LUMO+1
-9.745517    -9.619991    1.166634    1.320705  eV  HF/6-311++G(2D,P)

```



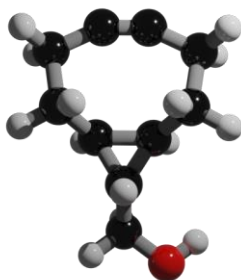

B3LYP/6-31G(D) optimised cartesian coordinates in Å

```

C -1.535097805949  0.216503152613  0.780603654246
C -1.495090093543  1.592247350513  1.512416110485
C -0.583177128793  2.434719011952  0.735956935942
C -0.169263588230 -0.441440948246  0.623624893310
C  0.109186941333 -1.468694381617 -0.458871679429
C  0.244048846417  2.653339920087 -0.121852450203
C  0.767282996305  0.828386259312 -1.611291291532
C  0.785648802185 -2.780881364275 -0.134939498689
C  0.872157587237 -0.163406806813 -0.458921400949
C  1.140428599355  2.290573658533 -1.221560587898
H -2.508430457570  2.008394816913  1.578569841869
H -2.195452973410 -0.464822382033  1.337290223612
H -1.998249942838  0.367435601721 -0.201268965622
H -1.140115995246  1.466284535412  2.544651523560
H -0.667538343066 -1.554610854643 -1.219833441177
H -0.586794161487 -3.376231200620  1.101739405570
H -0.251051046393  0.834619363749 -2.016709540497
H  0.291822242378 -0.667666194936  1.588307389820
H  1.033395614403  2.947897589999 -2.093820310176
H  1.236828759874 -3.216391703341 -1.033506361872
H  1.428297890856  0.493937387495 -2.423986640385
H  1.601612453019 -2.605739035855  0.587565164217
H  1.892651806174 -0.241947999357 -0.078830560910
H  2.193451540313  2.347571154581 -0.913147757673
O -0.122946256015 -3.767565082668  0.344530139492

```

Alkyne C-C distance : 1.212 Å  
 Alkyne bond angles : 154.75°, 154.81°

B3LYP/6-31G(D) frequency analysis

Number of imaginary frequencies: 0

```

E0 : -464.59664904 Ha
ZPE: -464.37720029 Ha
H : -464.36559127 Ha
S : 0.15892050 mHa/K
G : -464.41297342 Ha
evaluated at 298.15 K

```

```

HOMO-1      HOMO      LUMO      LUMO+1
-9.829246   -9.688074   1.037652   1.160974 eV  HF/6-311++G(2D,P)

```

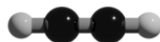

B3LYP/6-31G(D) optimised cartesian coordinates in Å

```
C -0.000000010212  0.000000044425 -0.602484980775
C -0.000000010212  0.000000044425  0.602484961555
H -0.000009075862  0.000000896472 -1.669106428570
H  0.000009319050 -0.000001954388  1.669106657424
```

```
Alkyne C-C distance      :  1.205 Å
Alkyne bond angles      : 180.00°, 180.00°
```

B3LYP/6-31G(D) frequency analysis

Number of imaginary frequencies: 0

```
E0 :    -77.32563186 Ha
ZPE:    -77.30021899 Ha
H  :    -77.29654192 Ha
S  :         0.07809315 mHa/K
G  :    -77.31982539 Ha
```

evaluated at 298.15 K

| HOMO-1     | HOMO       | LUMO     | LUMO+1   |    |                   |
|------------|------------|----------|----------|----|-------------------|
| -11.168183 | -11.168183 | 1.141436 | 1.277385 | eV | HF/6-311++G(2D,P) |

TS1

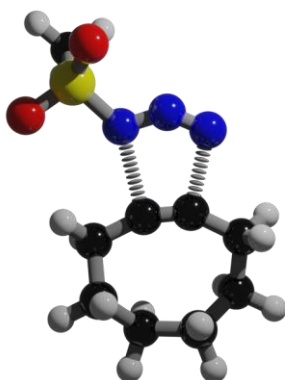

B3LYP/6-31G(D) optimised cartesian coordinates in Å

```
C -3.148356606691 2.579235149662 -0.629254936799
C -3.027257989458 1.046133973733 -0.481679825435
C -2.489050159376 3.431648407520 0.483020338988
C -1.612112977838 0.657849554129 -0.330011101966
C -1.001734129975 3.866989184529 0.309246065630
C -0.456104384370 0.974430838826 -0.040441426088
C 0.090117519094 3.083299470390 1.076267803709
C 0.659987310033 1.826462452254 0.370388697199
C 2.676426564695 -2.785659093179 -1.312864560995
H -4.220091931329 2.816298001876 -0.665577489478
H -3.588451562976 0.706613721437 0.400176913716
H -3.486082475129 0.548420341769 -1.344059877114
H -3.079243116013 4.353741915128 0.553211334665
H -2.736038842590 2.874177337299 -1.603212644586
H -2.615515008982 2.931194267156 1.453487257949
H -0.934373145855 4.905502230570 0.656457264528
H -0.749004009673 3.900597074728 -0.760118784000
H -0.300024319340 2.788748259424 2.058998297846
H 0.938486660294 3.752844146722 1.269023735382
H 1.242813376475 2.123138717616 -0.512461867438
H 1.350608128839 1.297673465552 1.035015464400
H 1.958406934123 -3.439511933723 -1.811274383124
H 2.957848476371 -1.946364012920 -1.950348244872
H 3.560306365280 -3.352539616321 -1.010371192347
N -1.597783731448 -1.491540562685 -0.772255161078
N -0.475011006244 -1.752813705039 -0.628079762228
N 0.635833790780 -1.164113703577 -0.412163200442
O 1.413984488191 -3.262291132365 0.975516552379
O 2.833894298629 -1.148992777790 0.777690933893
S 1.928267026432 -2.137016393881 0.195501909826
```

```
N1-N2 distance : 1.276 Å
N2-N3 distance : 1.162 Å
Alkyne C-C distance : 1.233 Å
N1-C distance : 2.430 Å
N3-C distance : 2.194 Å
Azide N-N-N angle : 139.36°
Alkyne bond angles : 158.54°, 148.86°
```

## B3LYP/6-31G(D) frequency analysis

Number of imaginary frequencies: 1

E0 : -1064.65235543 Ha  
ZPE: -1064.41014712 Ha  
H : -1064.39312311 Ha  
S : 0.21064736 mHa/K  
G : -1064.45592762 Ha  
evaluated at 298.15 K

Difference from GS1 and GS2 ground states

$\Delta E0$  : 0.01340461 Ha 8.411 kcal/mol  
 $\Delta H$  : 0.01399160 Ha 8.780 kcal/mol  
 $\Delta S$  : -0.06327509 mHa/K -39.705 cal/mol/K  
 $\Delta G$  : 0.03285707 Ha 20.618 kcal/mol  
evaluated at 298.15 K

### Azide at transition state geometry

E0 : -752.63732419 Ha B3LYP/6-31G(D)  
E0 : -749.98581599 Ha HF/6-311++G(2D,P)

$\Delta E_{\text{dist}}$  from GS1 ground state 17.72458 kcal/mol B3LYP/6-31G(D)

| HOMO-1     | HOMO       | LUMO     | LUMO+1   |                      |
|------------|------------|----------|----------|----------------------|
| -12.326763 | -12.053560 | 0.085689 | 0.906194 | eV HF/6-311++G(2D,P) |

### Alkyne at transition state geometry

E0 : -311.99750562 Ha B3LYP/6-31G(D)  
E0 : -309.84573460 Ha HF/6-311++G(2D,P)

$\Delta E_{\text{dist}}$  from GS2 ground state 1.68432 kcal/mol B3LYP/6-31G(D)

| HOMO-1    | HOMO      | LUMO     | LUMO+1   |                      |
|-----------|-----------|----------|----------|----------------------|
| -9.627120 | -9.532969 | 1.156756 | 1.320542 | eV HF/6-311++G(2D,P) |

HF/6-311++G(2D,P) Ground State HOMO - LUMO gaps (at distorted geometry)

HOMO Alkyne GS2 - LUMO Azide GS1 : 10.523 eV ( 9.619 eV)  
HOMO Azide GS1 - LUMO Alkyne GS2 : 12.982 eV ( 13.210 eV)

### B3LYP/6-31G(D) distortion-interaction analysis

$\Sigma \Delta E_{\text{dist}}$ : 19.40890 kcal/mol  
 $E_{\text{int}} = \Sigma \Delta E0 - \Sigma \Delta E_{\text{dist}}$ : -10.99737 kcal/mol

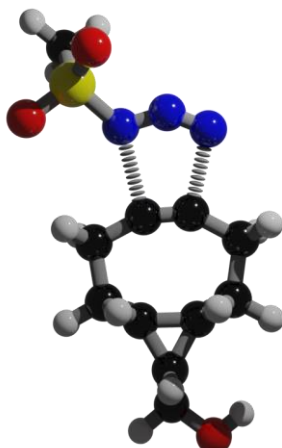

B3LYP/6-31G(D) optimised cartesian coordinates in Å

```

C -2.022111563594 -2.228277861997 1.049130742828
C -1.863024780567 -0.831017202717 1.702547399656
C -0.888715754848 -0.044649410523 0.920549895337
C -0.729858535861 -3.028789117841 0.975109882452
C -0.548308879960 -4.162192829496 -0.017848473608
C -0.047813329422 -0.025935040922 0.020202148841
C 0.018251375085 -5.494268991846 0.417814424645
C 0.270916674810 -2.016368222835 -1.337058971375
C 0.323857708171 -2.933122371726 -0.123538420297
C 0.782926283316 -0.576353711387 -1.054069694270
C 2.309181097022 4.461929033121 -0.161109890160
H -2.834210168754 -0.323899505614 1.748397590242
H -2.762637747934 -2.801209320932 1.625769053271
H -2.446362162882 -2.096667663941 0.046835060133
H -1.520135497527 -0.931254426770 2.741462610835
H -1.389401031039 -5.873394989862 1.700454769105
H -1.333532581728 -4.246437551285 -0.769959117561
H -0.752163591247 -1.952605016436 -1.725336548514
H -0.296280414780 -3.214107534550 1.960820222318
H 0.428639919463 -6.038461120230 -0.439977352555
H 0.731312578252 0.037098107593 -1.959809669835
H 0.848595471205 -5.327560801211 1.125795029127
H 0.882514510313 -2.451504551281 -2.139471111355
H 1.340176527489 -3.065954784983 0.251849783126
H 1.838237383231 -0.598143932850 -0.752046370862
H 1.900548499608 4.918040850202 0.742426510414
H 2.672043653627 5.232679328916 -0.845512232073
H 3.104054900337 3.753611999897 0.076410261754
N -1.064671444746 2.064228680929 1.663523682143
N -0.299392369364 2.584669593412 0.966069336147
N 0.596342690262 2.318612671573 0.100836437261
O -0.967096032873 -6.358644108786 0.973967617369
O -0.140032167486 4.491087457093 -1.192869344461
O 1.570693274951 2.849880538736 -2.143154323102
S 0.990162593876 3.579531286392 -1.018666878886

```

```

N1-N2 distance      : 1.273 Å
N2-N3 distance      : 1.159 Å
Alkyne C-C distance : 1.232 Å
N1-C distance       : 2.433 Å
N3-C distance       : 2.243 Å
Azide N-N-N angle   : 141.22°
Alkyne bond angles  : 156.48°, 147.74°

```

B3LYP/6-31G(D) frequency analysis

Number of imaginary frequencies: 1

E0 : -1217.25087376 Ha  
ZPE: -1216.97011412 Ha  
H : -1216.95018599 Ha  
S : 0.23423057 mHa/K  
G : -1217.02002183 Ha  
evaluated at 298.15 K

Difference from GS1 and GS3 ground states

$\Delta E0$  : 0.01134570 Ha 7.119 kcal/mol  
 $\Delta H$  : 0.01192935 Ha 7.486 kcal/mol  
 $\Delta S$  : -0.06239237 mHa/K -39.151 cal/mol/K  
 $\Delta G$  : 0.03053164 Ha 19.159 kcal/mol  
evaluated at 298.15 K

Azide at transition state geometry

E0 : -752.64006601 Ha B3LYP/6-31G(D)  
E0 : -749.98880533 Ha HF/6-311++G(2D,P)

$\Delta E_{\text{dist}}$  from GS1 ground state 16.00408 kcal/mol B3LYP/6-31G(D)

| HOMO-1     | HOMO       | LUMO     | LUMO+1   |                      |
|------------|------------|----------|----------|----------------------|
| -12.342436 | -12.024988 | 0.217392 | 0.907391 | eV HF/6-311++G(2D,P) |

Alkyne at transition state geometry

E0 : -464.59474472 Ha B3LYP/6-31G(D)  
E0 : -461.56849346 Ha HF/6-311++G(2D,P)

$\Delta E_{\text{dist}}$  from GS3 ground state 1.19496 kcal/mol B3LYP/6-31G(D)

| HOMO-1    | HOMO      | LUMO     | LUMO+1   |                      |
|-----------|-----------|----------|----------|----------------------|
| -9.728482 | -9.614358 | 1.033489 | 1.151913 | eV HF/6-311++G(2D,P) |

HF/6-311++G(2D,P) Ground State HOMO - LUMO gaps (at distorted geometry)

HOMO Alkyne GS3 - LUMO Azide GS1 : 10.591 eV ( 9.832 eV)  
HOMO Azide GS1 - LUMO Alkyne GS3 : 12.853 eV ( 13.058 eV)

B3LYP/6-31G(D) distortion-interaction analysis

$\Sigma \Delta E_{\text{dist}}$ : 17.19904 kcal/mol  
 $E_{\text{int}} = \Sigma \Delta E0 - \Sigma \Delta E_{\text{dist}}$ : -10.07959 kcal/mol

## TS3

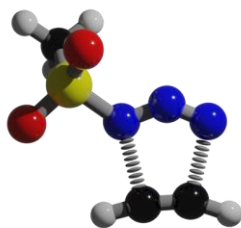

B3LYP/6-31G(D) optimised cartesian coordinates in Å

```

C  -2.739635483330  0.775690313641  1.293251677467
C  -1.845072207042  1.538666465355  0.923791422009
C   1.409303265664 -0.516354327130 -2.056292985287
H  -3.652576283571  0.476594525023  1.761638671629
H  -1.179930526456  2.342842462708  0.698867336253
H   0.912993045703  0.211438887901 -2.699568394561
H   0.980392971178 -1.512717313123 -2.177247268723
H   2.483652133035 -0.537796547430 -2.255314883106
N  -2.172692392396 -1.179621990615  0.666267398821
N  -1.159427975084 -0.937588718638  0.140207201235
N  -0.516342897870  0.115053009108 -0.189188468793
O   1.627225503708  1.392971381461 -0.211176310430
O   1.737206309212 -1.050994529889  0.525481693670
S   1.208567381609  0.000075350137 -0.340672719257

```

```

N1-N2 distance      :  1.277 Å
N2-N3 distance      :  1.167 Å
Alkyne C-C distance :  1.232 Å
N1-C distance       :  2.243 Å
N3-C distance       :  2.130 Å
Azide N-N-N angle   : 136.43°
Alkyne bond angles  : 169.03°, 157.61°

```

B3LYP/6-31G(D) frequency analysis

Number of imaginary frequencies: 1

```

E0 :   -829.96554018 Ha
ZPE:   -829.87630716 Ha
H   :   -829.86552540 Ha
S   :         0.15716510 mHa/K
G   :   -829.91238418 Ha
evaluated at 298.15 K

```

Difference from GS1 and GS4 ground states

```

ΔE0 :         0.02566210 Ha          16.103 kcal/mol
ΔH   :         0.02754059 Ha          17.282 kcal/mol
ΔS   :        -0.05863049 mHa/K       -36.791 cal/mol/K
ΔG   :         0.04502126 Ha          28.251 kcal/mol
evaluated at 298.15 K

```

Azide at transition state geometry

E0 : -752.63114165 Ha B3LYP/6-31G(D)  
E0 : -749.97767517 Ha HF/6-311++G(2D,P)

$\Delta E_{\text{dist}}$  from GS1 ground state 21.60414 kcal/mol B3LYP/6-31G(D)

| HOMO-1     | HOMO       | LUMO      | LUMO+1   |    |                   |
|------------|------------|-----------|----------|----|-------------------|
| -12.268068 | -11.929204 | -0.049389 | 0.907418 | eV | HF/6-311++G(2D,P) |

Alkyne at transition state geometry

E0 : -77.31705545 Ha B3LYP/6-31G(D)  
E0 : -76.80371615 Ha HF/6-311++G(2D,P)

$\Delta E_{\text{dist}}$  from GS4 ground state 5.38172 kcal/mol B3LYP/6-31G(D)

| HOMO-1     | HOMO       | LUMO     | LUMO+1   |    |                   |
|------------|------------|----------|----------|----|-------------------|
| -11.026657 | -11.008153 | 1.179913 | 1.367672 | eV | HF/6-311++G(2D,P) |

HF/6-311++G(2D,P) Ground State HOMO - LUMO gaps (at distorted geometry)

HOMO Alkyne GS4 - LUMO Azide GS1 : 12.071 eV ( 10.959 eV)

HOMO Azide GS1 - LUMO Alkyne GS4 : 12.957 eV ( 13.109 eV)

B3LYP/6-31G(D) distortion-interaction analysis

$\Sigma \Delta E_{\text{dist}}$ : 26.98587 kcal/mol

$E_{\text{int}} = \Sigma \Delta E_0 - \Sigma \Delta E_{\text{dist}}$ : -10.88284 kcal/mol



## References

- 1 ) L. Brandsma, H. D. Verkruisje, *Synthesis* **1978**, 1978, 290-290.
- 2 ) J. Dommerholt, S. Schmidt, R. Temming, L. J. A. Hendriks, F. P. J. T. Rutjes, J. C. M. van Hest, D. J. Lefeber, P. Friedl, F. L. van Delft, *Angew. Chem. Int. Ed.* **2010**, 49, 9422-9425.
- 3 ) K. Banert, T. Pester, *J. Org. Chem.* **2019**, 84, 4033-4039.
- 4 ) P. Müller, P. Nury, *Helv. Chim. Acta* **2001**, 84, 662-677.
- 5 ) J. K. Whitesell, M. A. Minton, S. W. Felman, *J. Org. Chem.* **1983**, 48, 2193-2195.
- 6 a) J. M. Turney, A. C. Simmonett, R. M. Parrish, E. G. Hohenstein, F. A. Evangelista, J. T. Fermann, B. J. Mintz, L. A. Burns, J. J. Wilke, M. L. Abrams, N. J. Russ, M. L. Leininger, C. L. Janssen, E. T. Seidl, W. D. Allen, H. F. Schaefer, R. A. King, E. F. Valeev, C. D. Sherrill, T. D. Crawford, *Wiley Interdiscip. Rev. Comput. Mol. Sci.* **2012**, 2, 556-565; b) D. G. A. Smith, L. A. Burns, A. C. Simmonett, R. M. Parrish, M. C. Schieber, R. Galvelis, P. Kraus, H. Kruse, R. Di Remigio, A. Alenaizan, A. M. James, S. Lehtola, J. P. Misiewicz, M. Scheurer, R. A. Shaw, J. B. Schriber, Y. Xie, Z. L. Glick, D. A. Sirianni, J. S. O'Brien, J. M. Waldrop, A. Kumar, E. G. Hohenstein, B. P. Pritchard, B. R. Brooks, H. F. Schaefer, A. Y. Sokolov, K. Patkowski, A. E. DePrince, U. Bozkaya, R. A. King, F. A. Evangelista, J. M. Turney, T. D. Crawford, C. D. Sherrill, *J. Chem. Phys.* **2020**, 152; c) P. J. Stephens, F. J. Devlin, C. F. Chabalowski, M. J. Frisch, *J. Phys. Chem.* **2002**, 98, 11623-11627; d) S. Lehtola, C. Steigemann, M. J. T. Oliveira, M. A. L. Marques, *SoftwareX* **2018**, 7, 1-5.
- 7 ) G. Deng, D. Li, Z. Wu, H. Li, E. Bernhardt, X. Zeng, *J. Phys. Chem. A* **2016**, 120, 5590-5597.
- 8 a) D. H. Ess, G. O. Jones, K. N. Houk, *Org. Lett.* **2008**, 10, 1633-1636; b) F. Schoenebeck, D. H. Ess, G. O. Jones, K. N. Houk, *J. Am. Chem. Soc.* **2009**, 131, 8121-8133.
- 9 ) J. Dommerholt, O. van Rooijen, A. Borrmann, C. F. Guerra, F. M. Bickelhaupt, F. L. van Delft, *Nature Communications* **2014**, 5.
- 10 ) I. Yavari, F. Nasiri, H. Djahaniani, A. Jabbari, *Int. J. Quantum Chem* **2006**, 106, 697-703.
